# Supplementary material for: Phytochemicals from Pterocarpus angolensis DC and Their Cytotoxic Activities against Breast Cancer Cells
Source: MDPI journal article supplement (doi:10.3390/plants13020301), 2024-01-19
Supplement: s1 [file s1]

## Legends for Figures

**Figure S1:**  $^1\text{H}$  NMR spectrum of friedelan-3-one (**1**) recorded in  $\text{CDCl}_3$ .

**Figure S2:**  $^{13}\text{C}$  NMR spectrum of friedelan-3-one (**1**) recorded in  $\text{CDCl}_3$ .

**Figure S3:** MS spectrum of friedelan-3-one (**1**).

**Figure S4:** FT-IR spectrum of friedelan-3-one (**1**)

**Figure S5:**  $^1\text{H}$  NMR spectrum of 3 $\alpha$  -Hydroxyfriedel-2-one (**2**) recorded in  $\text{CDCl}_3$ .

**Figure S6:**  $^{13}\text{C}$  NMR spectrum of 3 $\alpha$  -Hydroxyfriedel-2-one (**2**) recorded in  $\text{CDCl}_3$ .

**Figure S7:** MS spectrum of 3 $\alpha$  -Hydroxyfriedel-2-one (**2**).

**Figure S8:** FT-IR spectrum of 3 $\alpha$  -Hydroxyfriedel-2-one (**2**).

**Figure S9:**  $^1\text{H}$  NMR spectrum of 3-Hydroxyfriedel-3-en-2-one (**3**) recorded in  $\text{CDCl}_3$ .

**Figure S10:**  $^{13}\text{C}$  NMR spectrum of 3-Hydroxyfriedel-3-en-2-one (**3**) recorded in  $\text{CDCl}_3$ .

**Figure S11:** MS spectrum of 3-Hydroxyfriedel-3-en-2-one (**3**).

**Figure S12:** FT-IR spectrum of 3-Hydroxyfriedel-3-en-2-one (**3**).

**Figure S13:**  $^1\text{H}$  NMR spectrum of Lupeol (**4**) recorded in  $\text{CDCl}_3$ .

**Figure S14:**  $^{13}\text{C}$  NMR spectrum of Lupeol (**4**) recorded in  $\text{CDCl}_3$ .

**Figure S15:** MS spectrum of Lupeol (**4**).

**Figure S16:** FT-IR spectrum of Lupeol (**4**).

**Figure S17:**  $^1\text{H}$  NMR spectrum of Stigmasterol (**5**) recorded in  $\text{CDCl}_3$ .

**Figure S18:**  $^{13}\text{C}$  NMR spectrum of Stigmasterol (**5**) recorded in  $\text{CDCl}_3$ .

**Figure S19:** MS spectrum of Stigmasterol (**5**).

**Figure S20:** FT-IR spectrum of Stigmasterol (**5**).

**Figure S21:**  $^1\text{H}$  NMR spectrum of ( $\pm$ ) -4-O-Methylangolensin (**6**) recorded in  $\text{CDCl}_3$ .

**Figure S22:**  $^{13}\text{C}$  NMR spectrum of ( $\pm$ ) -4-O-Methylangolensin (**6**) recorded in  $\text{CDCl}_3$ .

**Figure S23:** MS spectrum of (±) -4-O-Methylangolensin (**6**).

**Figure S24:** FT-IR spectrum of (±) -4-O-Methylangolensin (**6**).

**Figure S25:**  $^1\text{H}$  NMR spectrum of Oleanolic acid acetate (**7**) recorded in  $\text{CDCl}_3$ .

**Figure S26:**  $^{13}\text{C}$  NMR spectrum of Oleanolic acid acetate (**7**) recorded in  $\text{CDCl}_3$ .

**Figure S27:** MS spectrum of Oleanolic acid acetate (**7**).

**Figure S28:** FT-IR spectrum of Oleanolic acid acetate (**7**).

**Figure S29:**  $^1\text{H}$  NMR spectrum of Tetradecyl (E)-ferulate (**8**) recorded in  $\text{CDCl}_3$ .

**Figure S30:**  $^{13}\text{C}$  NMR spectrum of Tetradecyl (E)-ferulate (**8**) recorded in  $\text{CDCl}_3$ .

**Figure S31:** MS spectrum of Tetradecyl (E)-ferulate (**8**).

**Figure S32:** FT-IR spectrum of Tetradecyl (E)-ferulate (**8**).

**Figure S33:**  $^1\text{H}$  NMR spectrum of 9-Octadecenoic acid (**9**) recorded in  $\text{CDCl}_3$ .

**Figure S34:**  $^{13}\text{C}$  NMR spectrum of 9-Octadecenoic acid (**9**) recorded in  $\text{CDCl}_3$ .

**Figure S35:** MS spectrum of 9-Octadecenoic acid (**9**).

**Figure S36:** FT-IR spectrum of 9-Octadecenoic acid (**9**).

**Table S1:**  $^{13}\text{C}$  NMR (100 MHz) data ( $\delta$  value) of isolated compounds (1-8) in  $\text{CHCl}_3$ .

**Table S2:**  $^1\text{H}$  NMR (400 MHz) data ( $\delta$  value) of isolated compounds (1-5 and 7) in  $\text{CHCl}_3$ .

**Table S3:**  $^1\text{H}$  NMR (400 MHz) data ( $\delta$  value) of isolated compounds (6 and 8) in  $\text{CHCl}_3$ .

PROTON\_07  
ZTPA80-95\_major\_cult

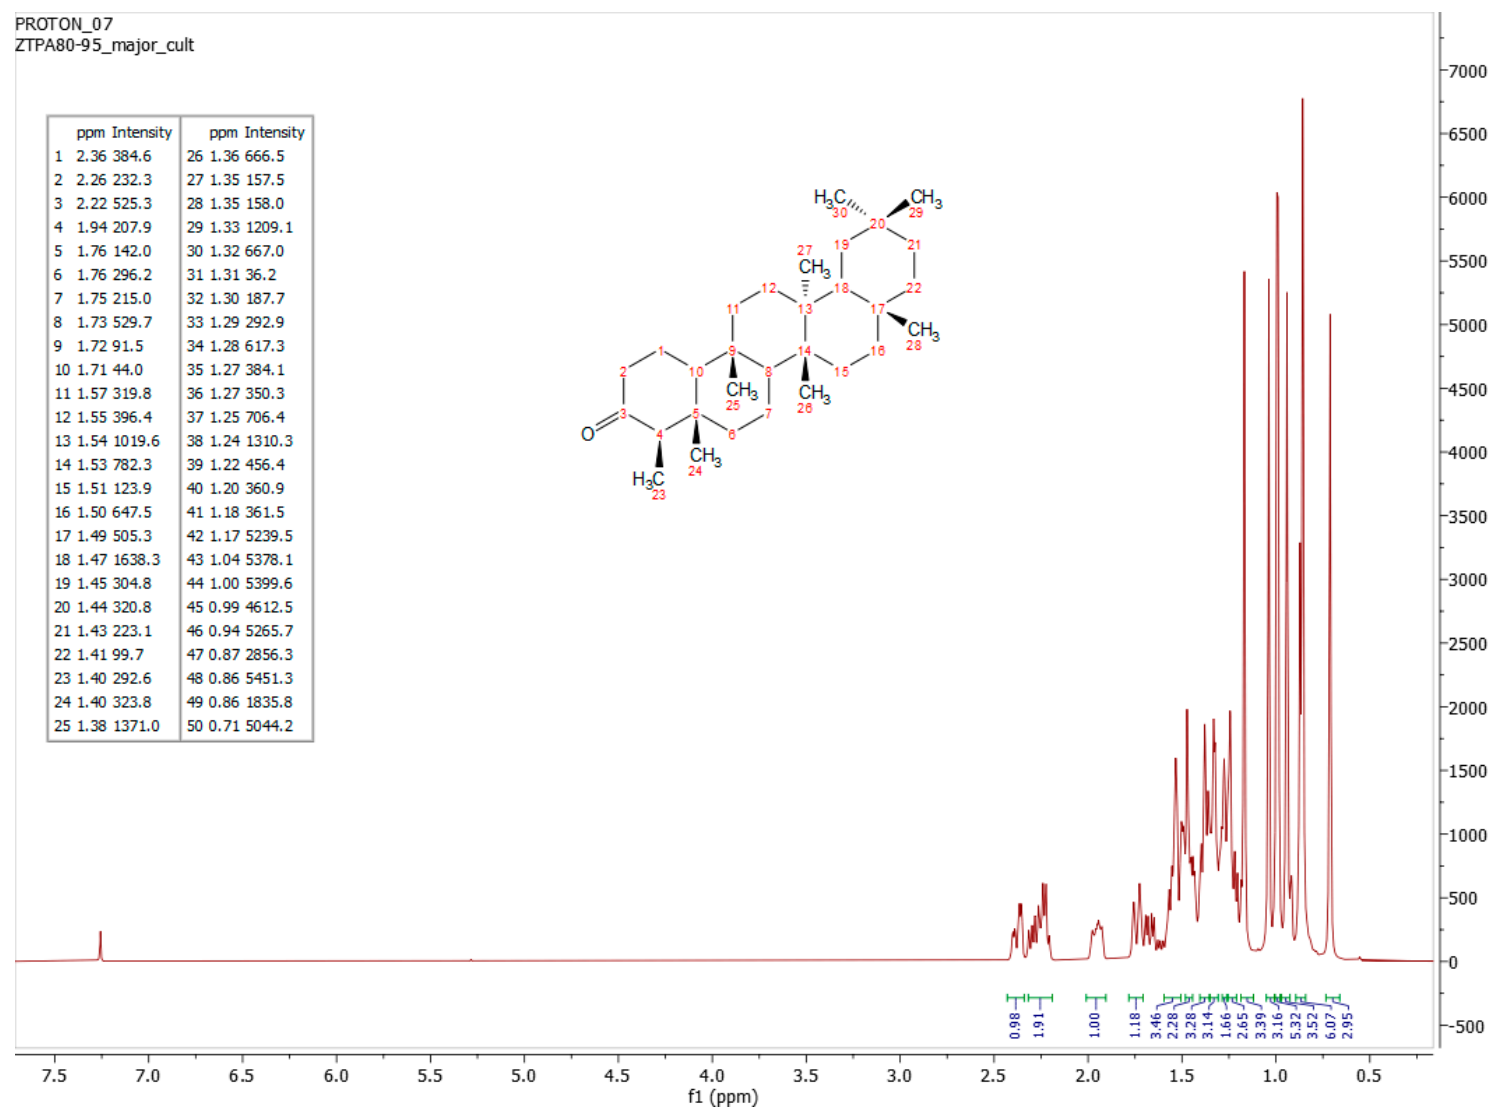

**Figure S1:**  $^1\text{H}$  NMR spectrum of friedelan-3-one (**1**) recorded in  $\text{CDCl}_3$ .

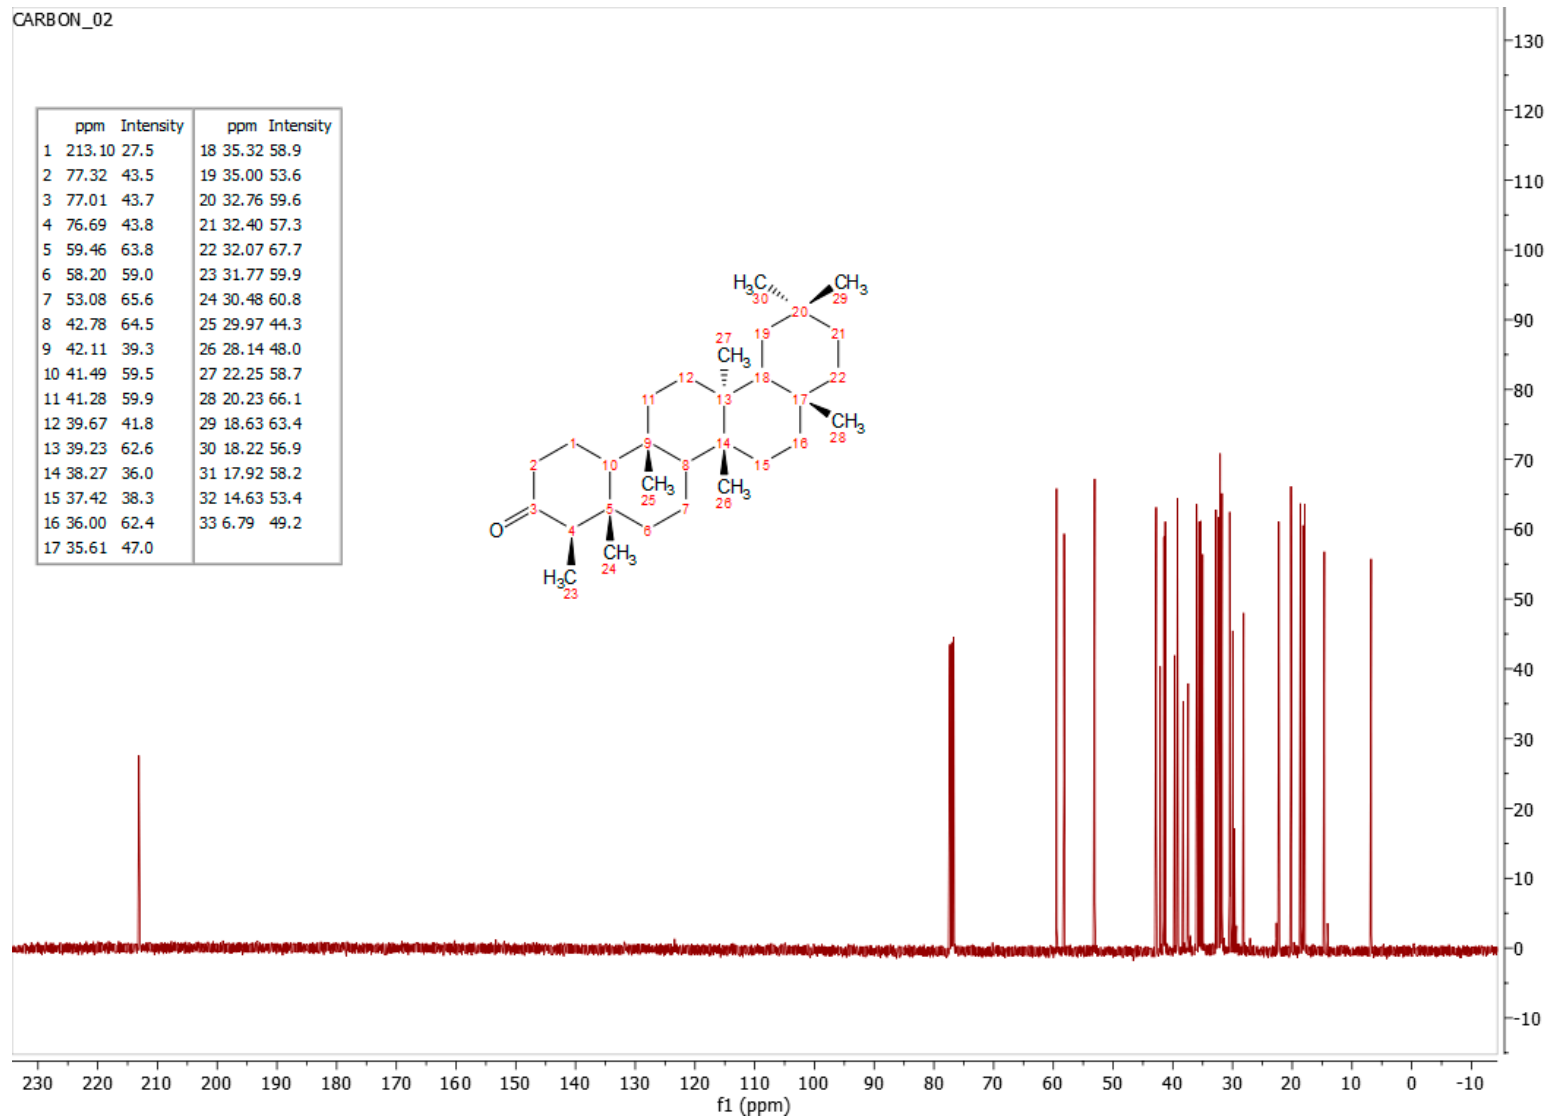

**Figure S2:**  $^{13}\text{C}$  NMR spectrum of friedelan-3-one (1) recorded in  $\text{CDCl}_3$ .

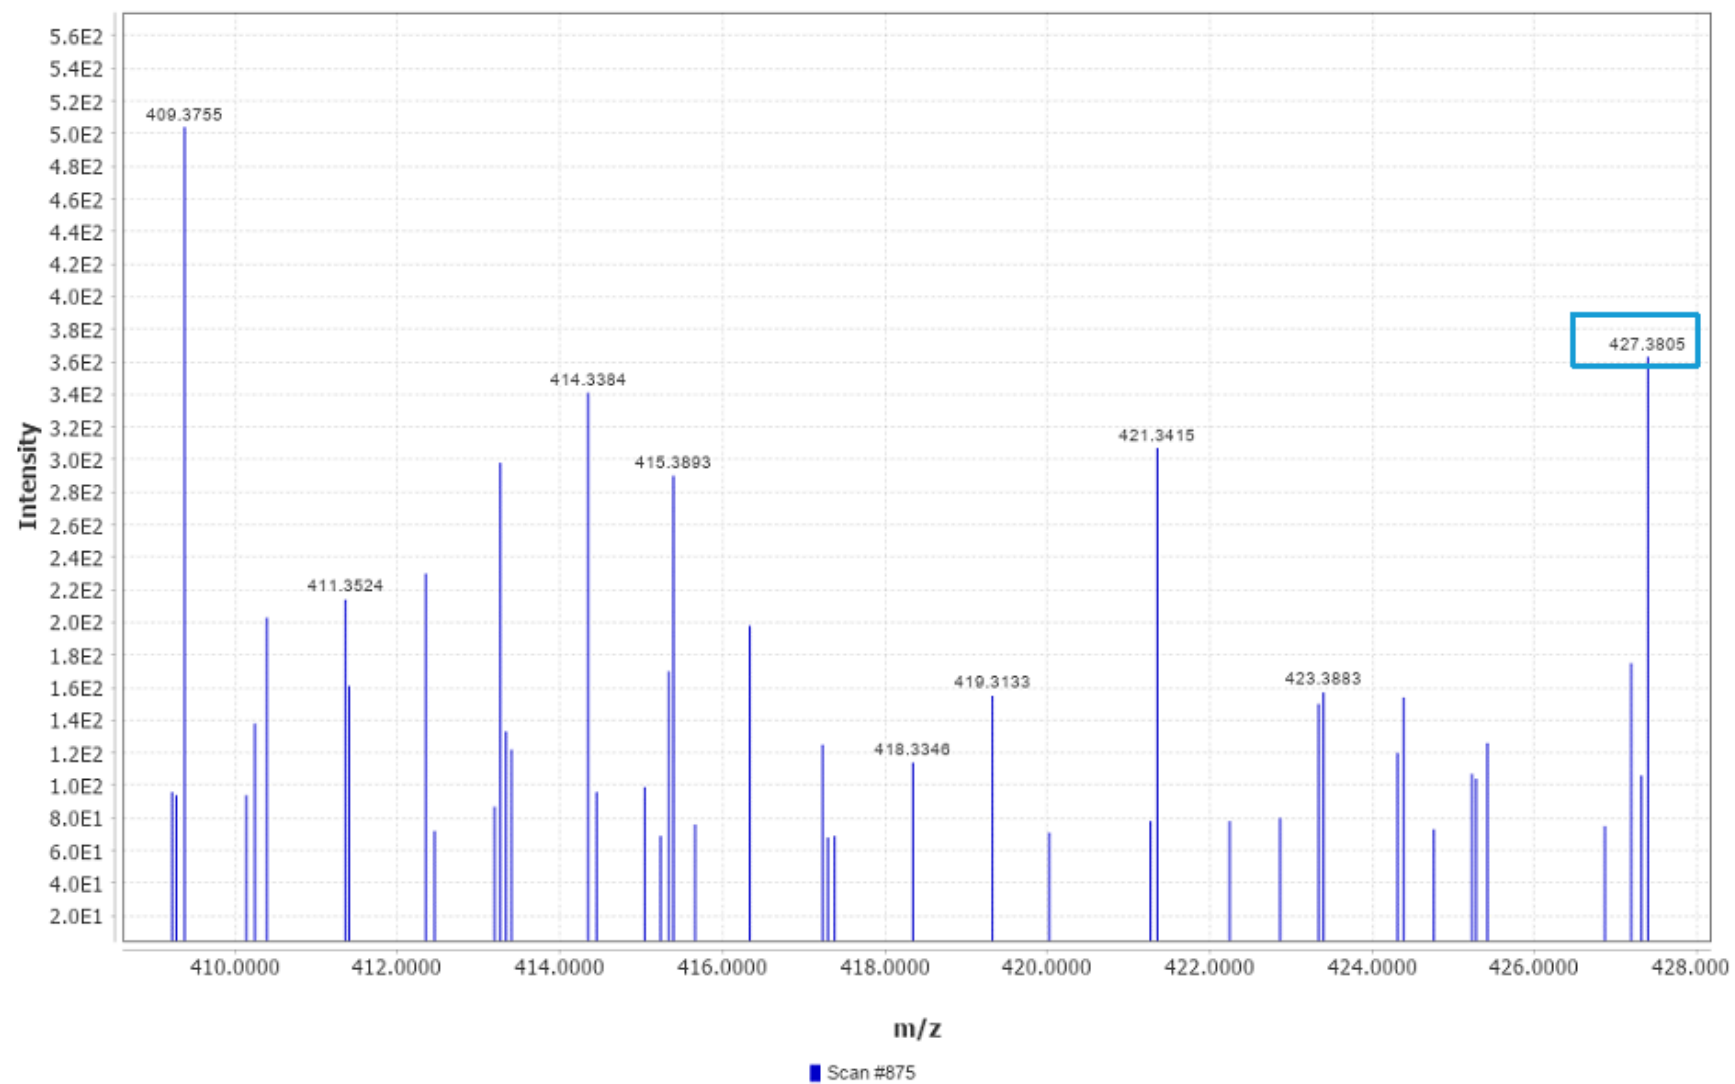

**Figure S3:** MS spectrum of friedelan-3-one (1).

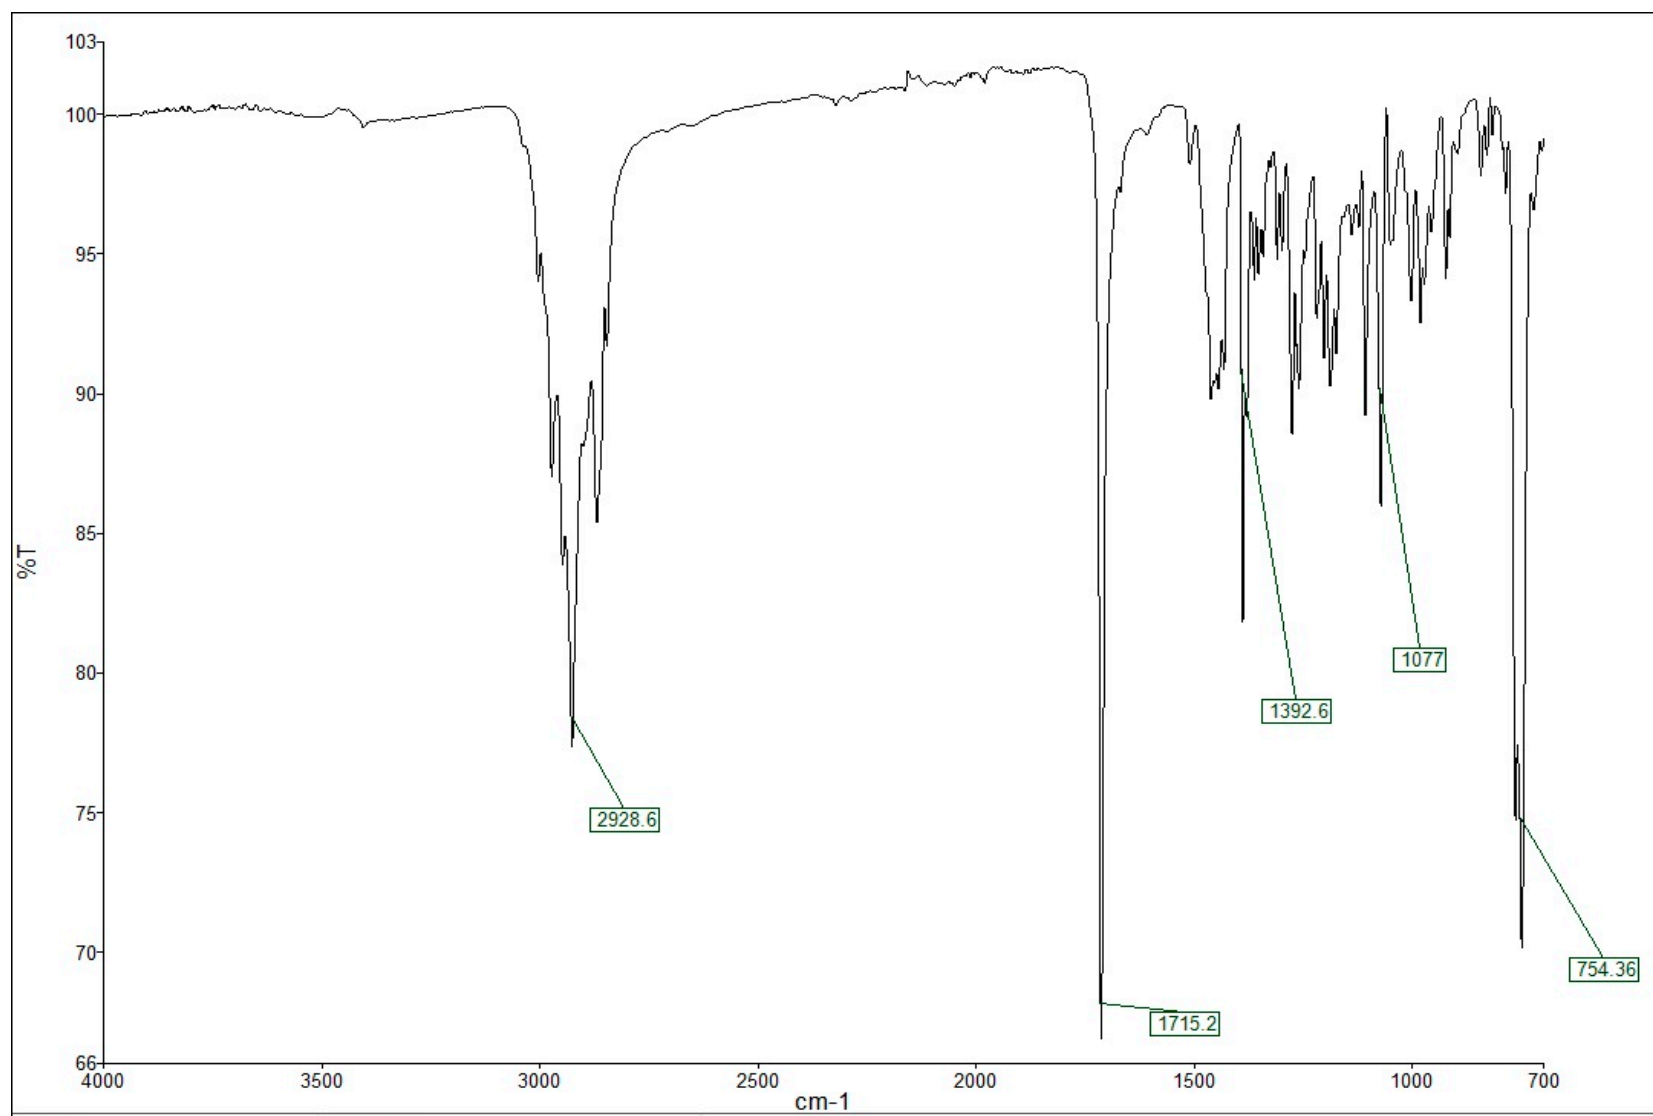

**Figure S4:** FT-IR spectrum of friedelan-3-one (**1**).

PROTON\_05  
ZTPA324-495\_2\_

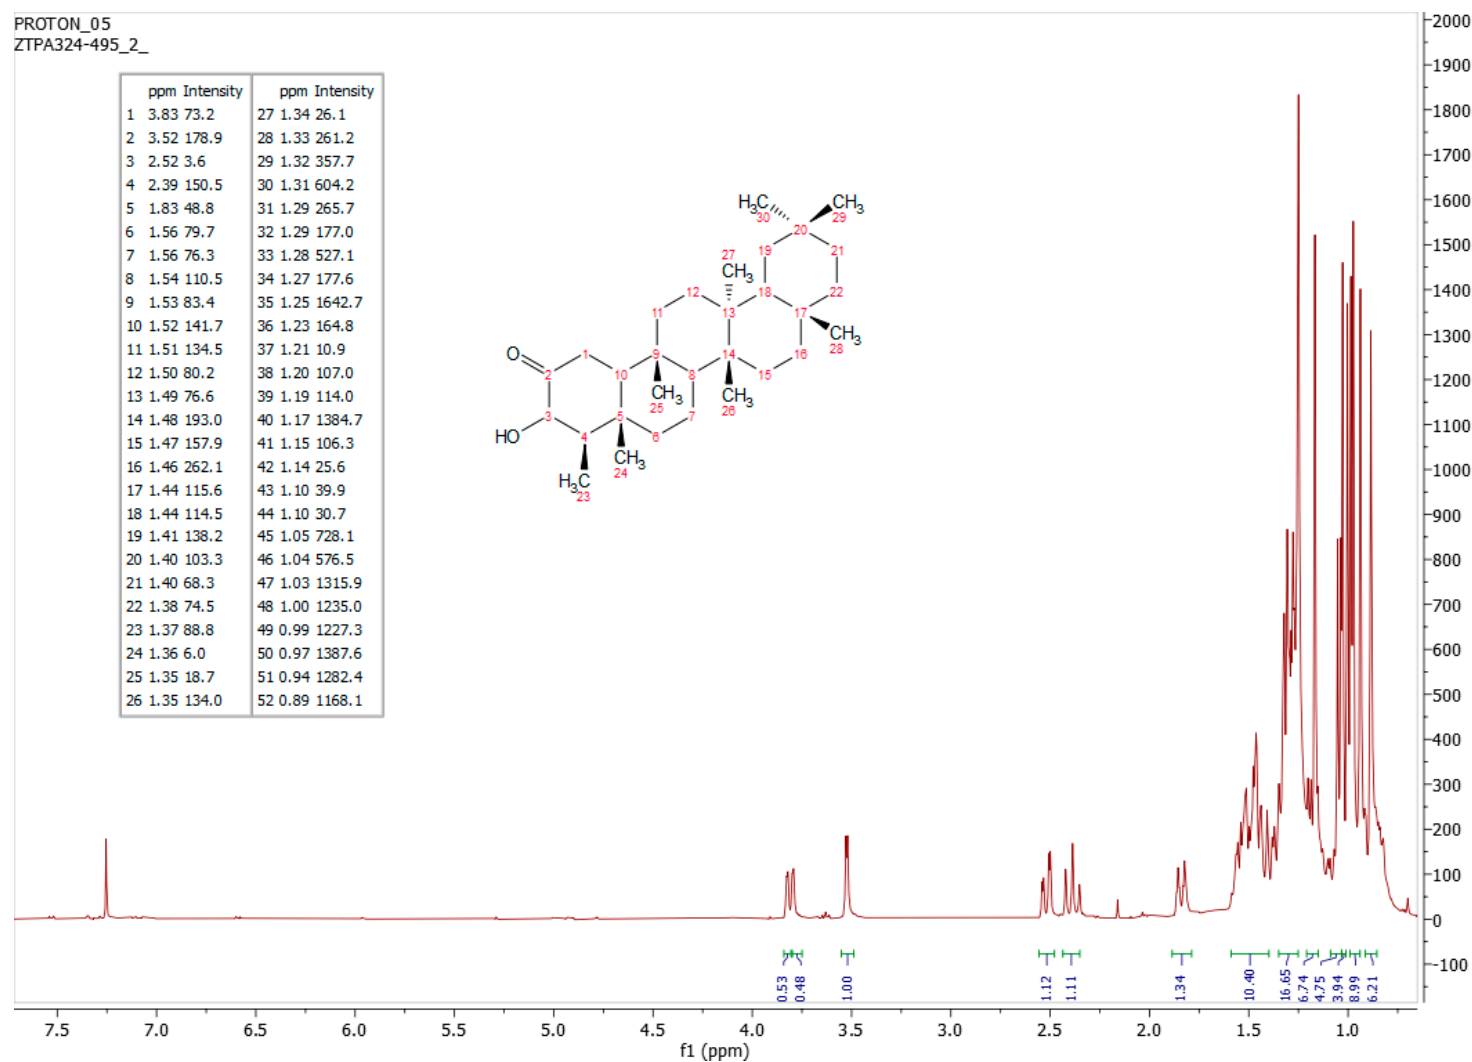

**Figure S5:**  $^1\text{H}$  NMR spectrum of 3 $\alpha$ -Hydroxyfriedel-2-one (**2**) recorded in  $\text{CDCl}_3$ .

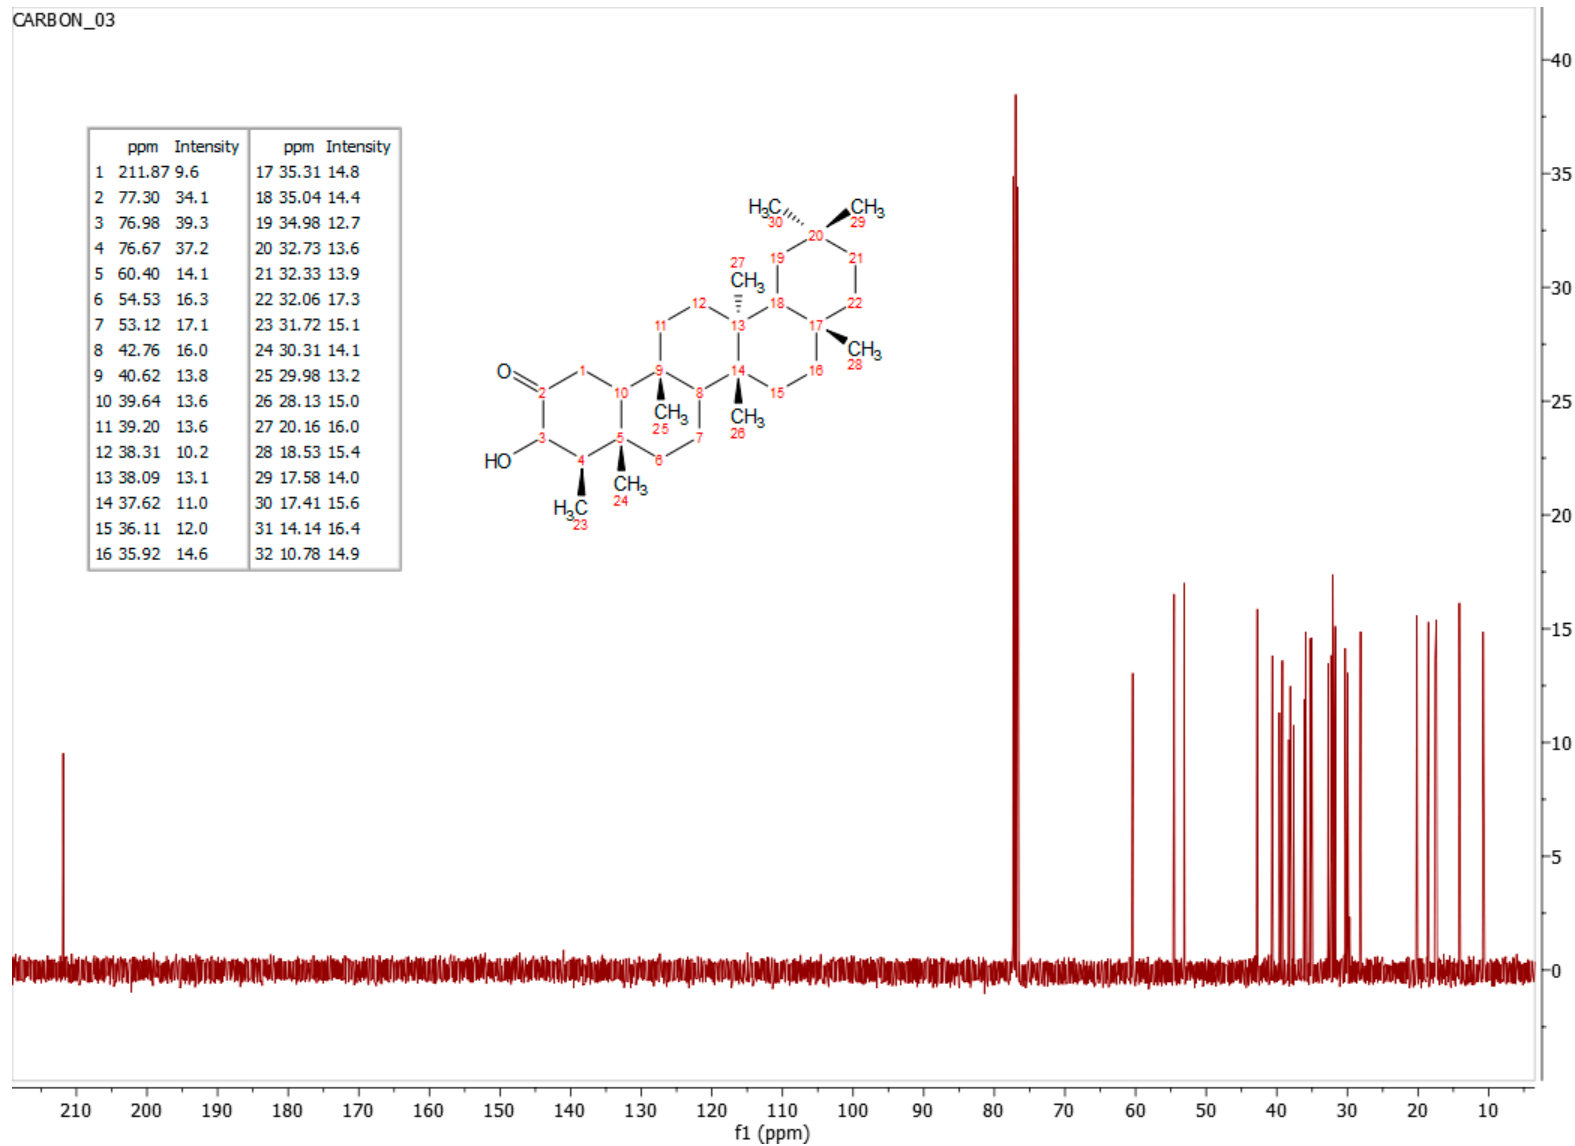

**Figure S6:**  $^{13}\text{C}$  NMR spectrum of 3 $\alpha$ -Hydroxyfriedel-2-one (**2**) recorded in  $\text{CDCl}_3$ .



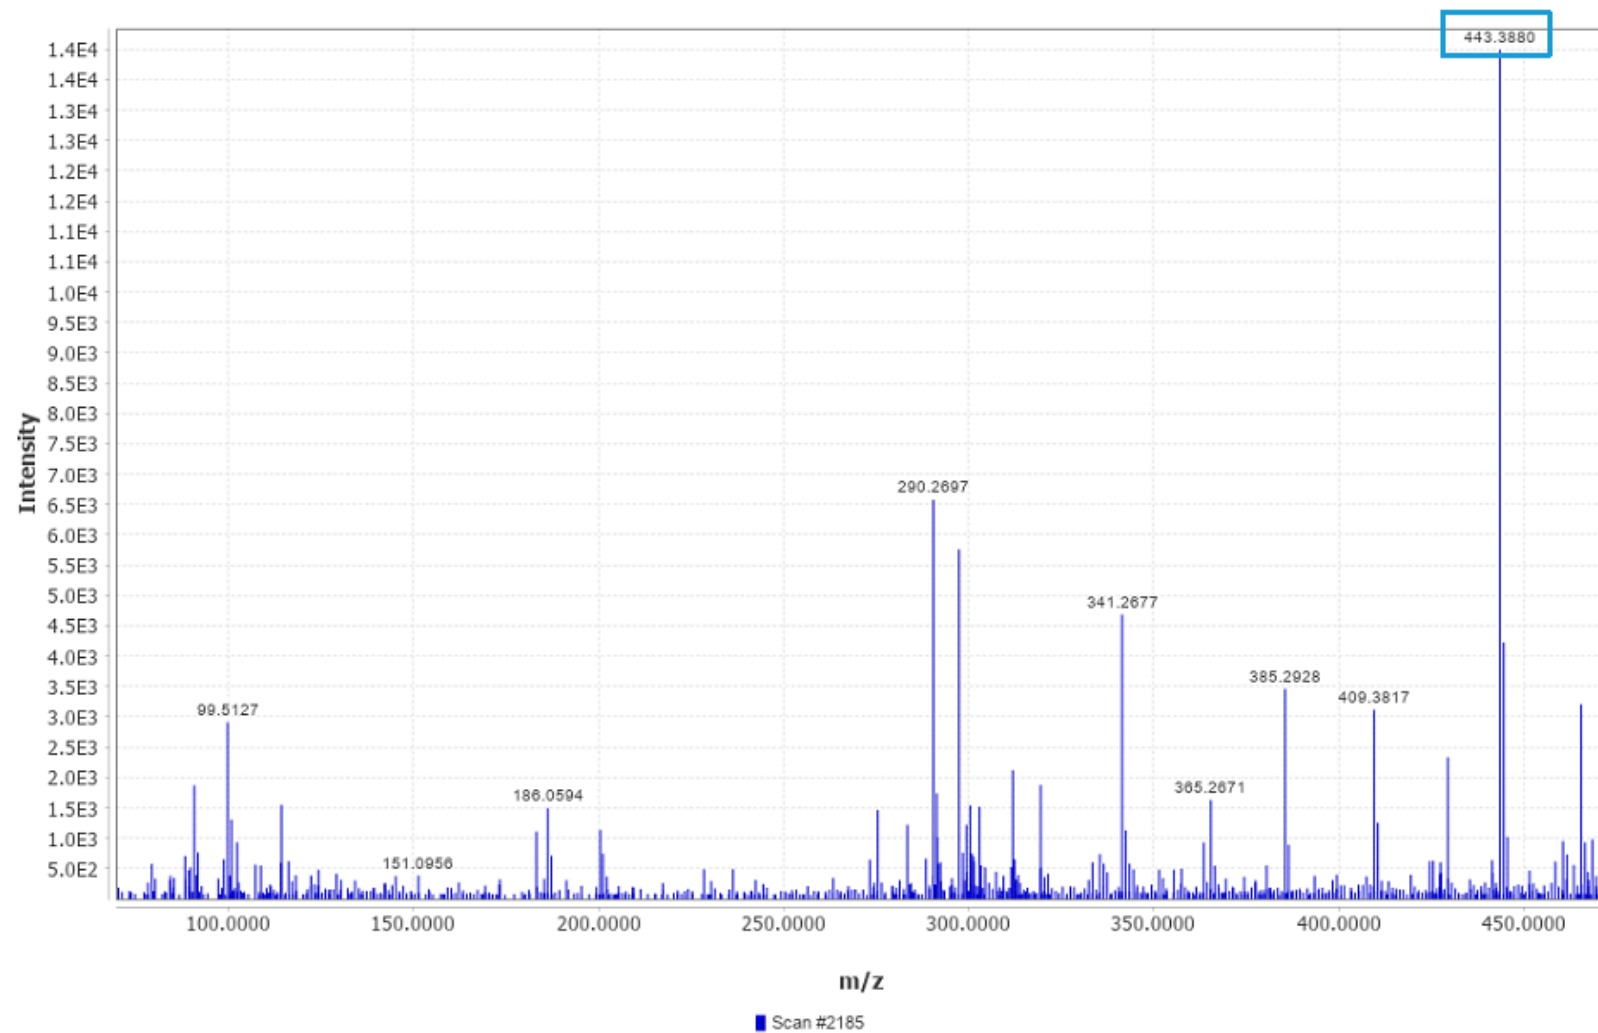

**Figure S7:** MS spectrum of 3α -Hydroxyfriedel-2-one (2).

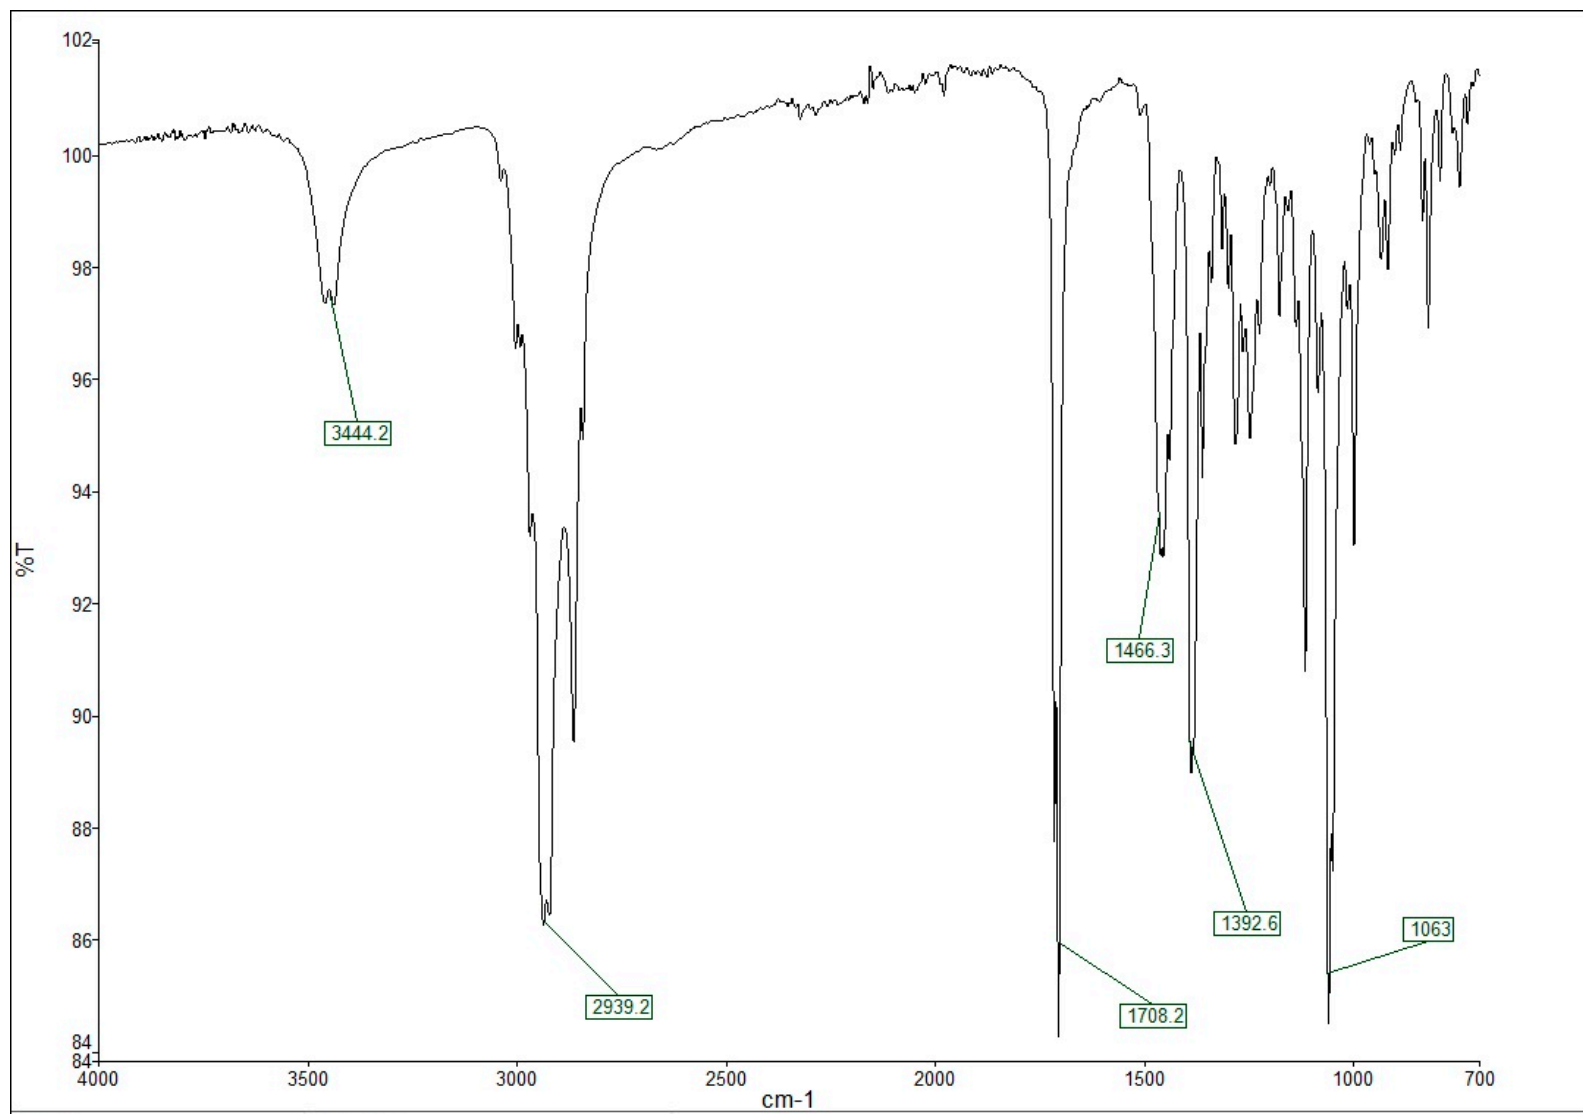

**Figure S8:** FT-IR spectrum of 3α -Hydroxyfriedel-2-one (**2**).

PROTON\_05  
ZTPA318-329\_1\_cult

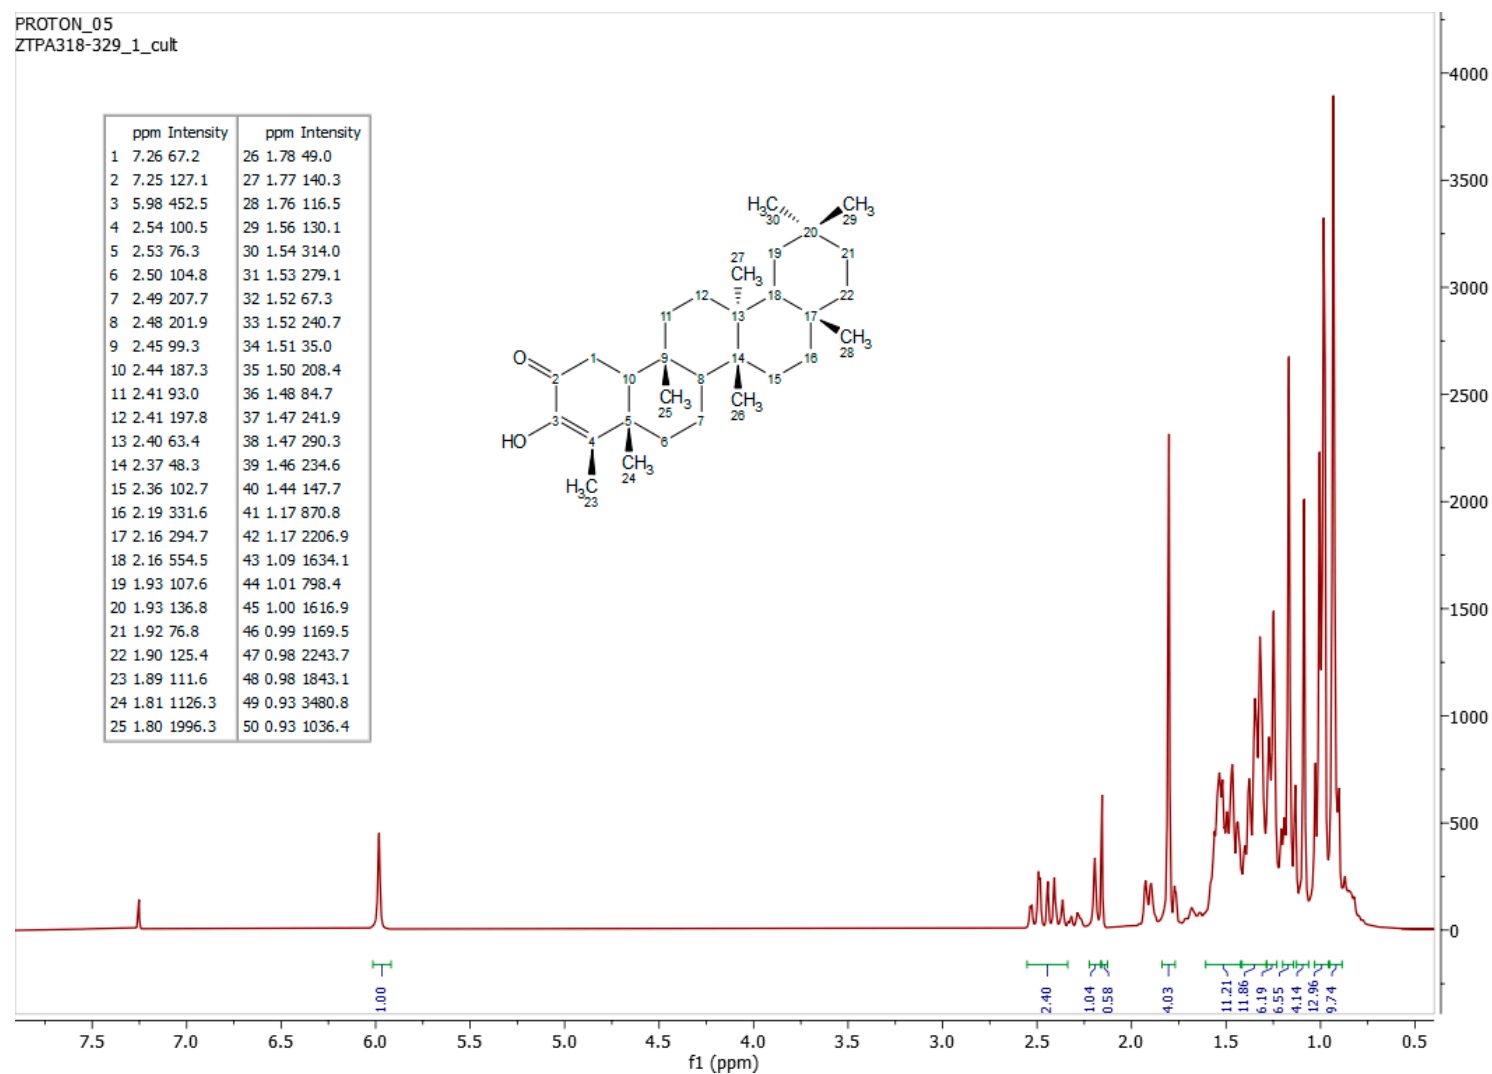

**Figure S9:**  $^1\text{H}$  NMR spectrum of 3-Hydroxyfriedel-3-en-2-one (**3**) recorded in  $\text{CDCl}_3$ .

CARBON\_05  
ZTPA318-329\_1\_cult

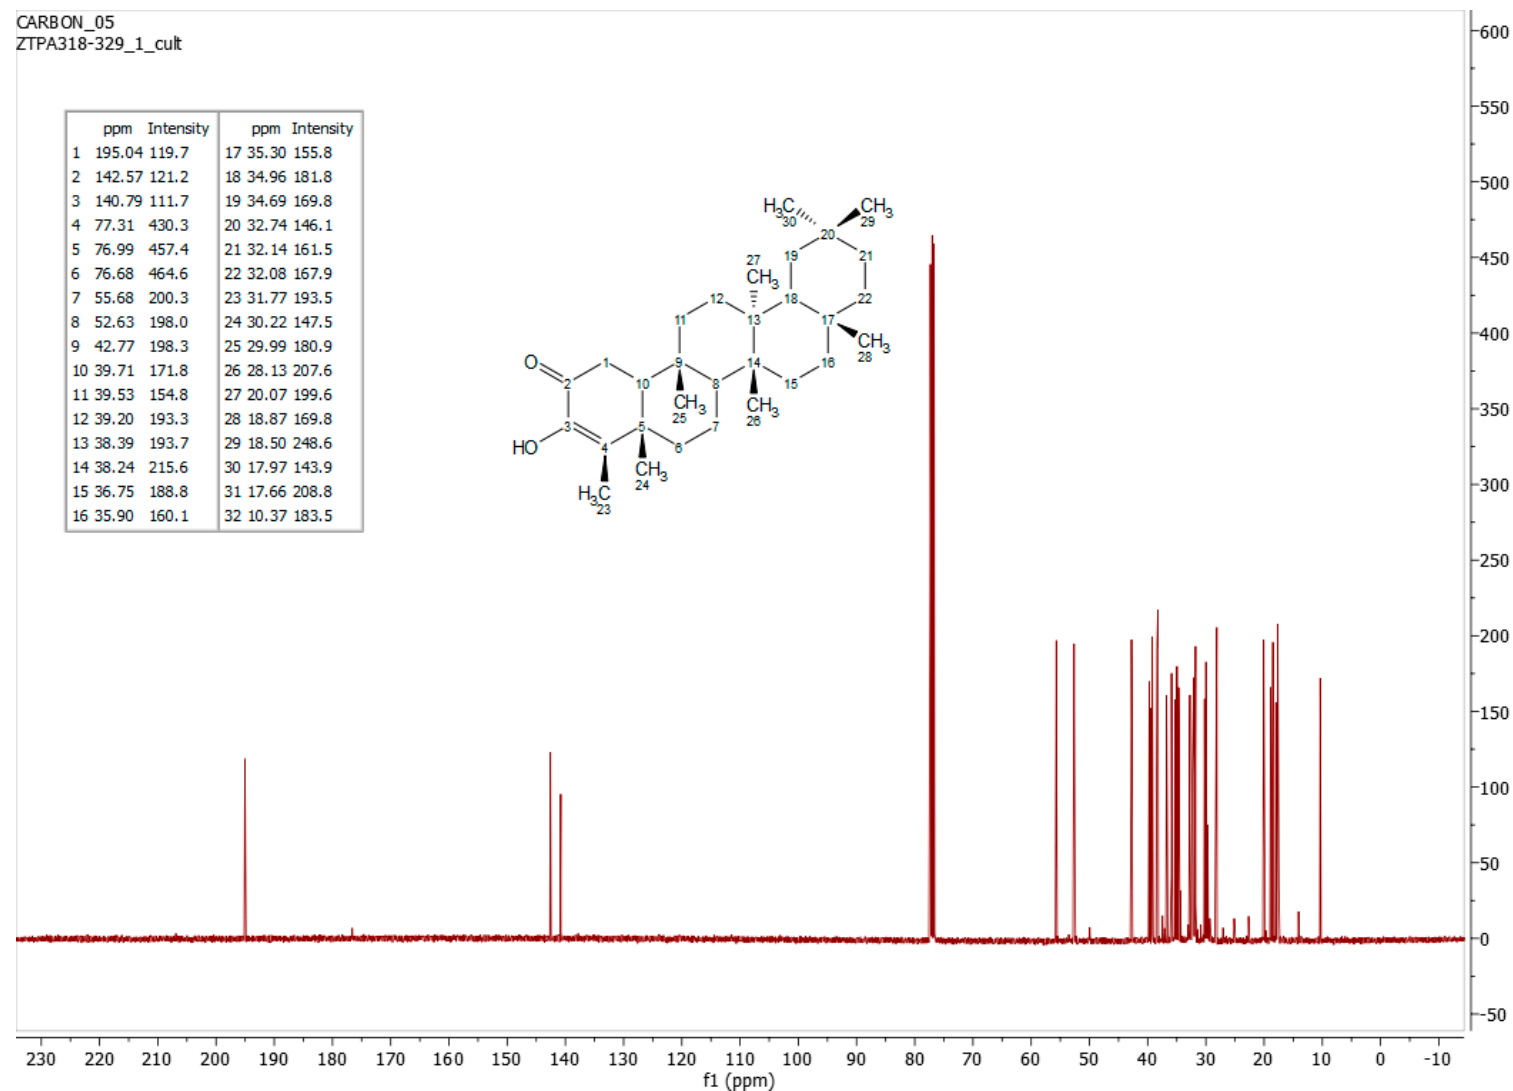

**Figure S10:**  $^{13}\text{C}$  NMR spectrum of 3-Hydroxyfriedel-3-en-2-one (**3**) recorded in  $\text{CDCl}_3$ .

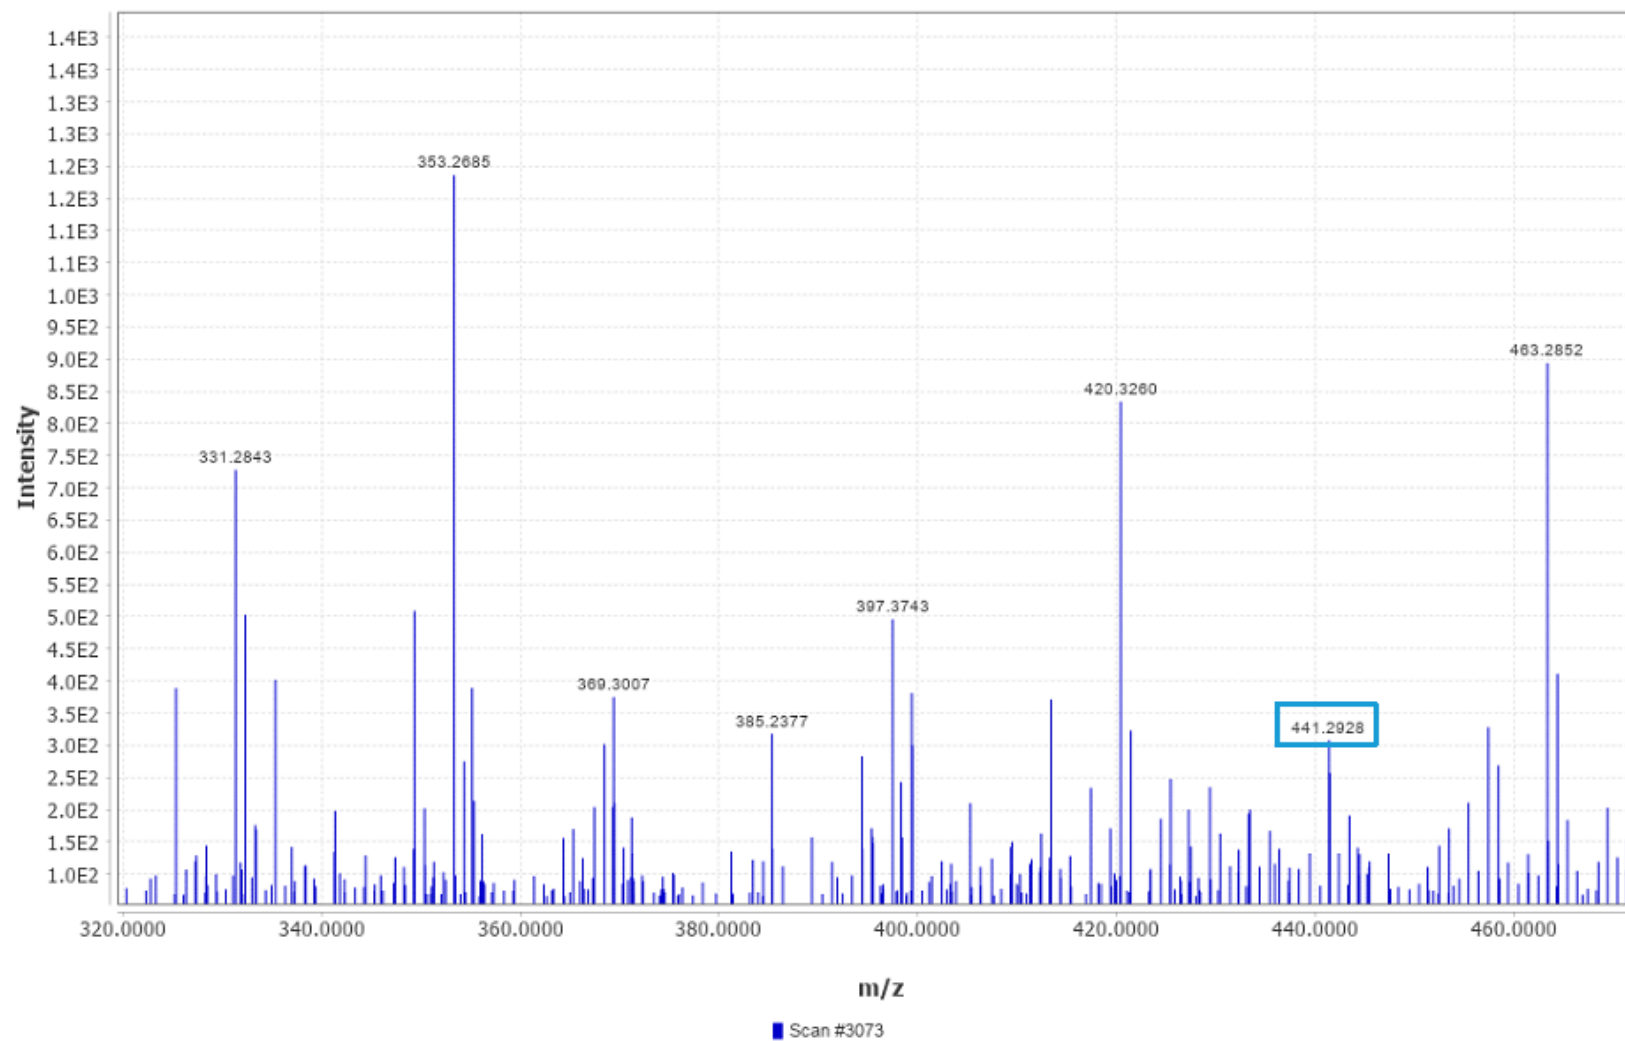

**Figure S11:** MS spectrum of 3-Hydroxyfriedel-3-en-2-one (**3**).

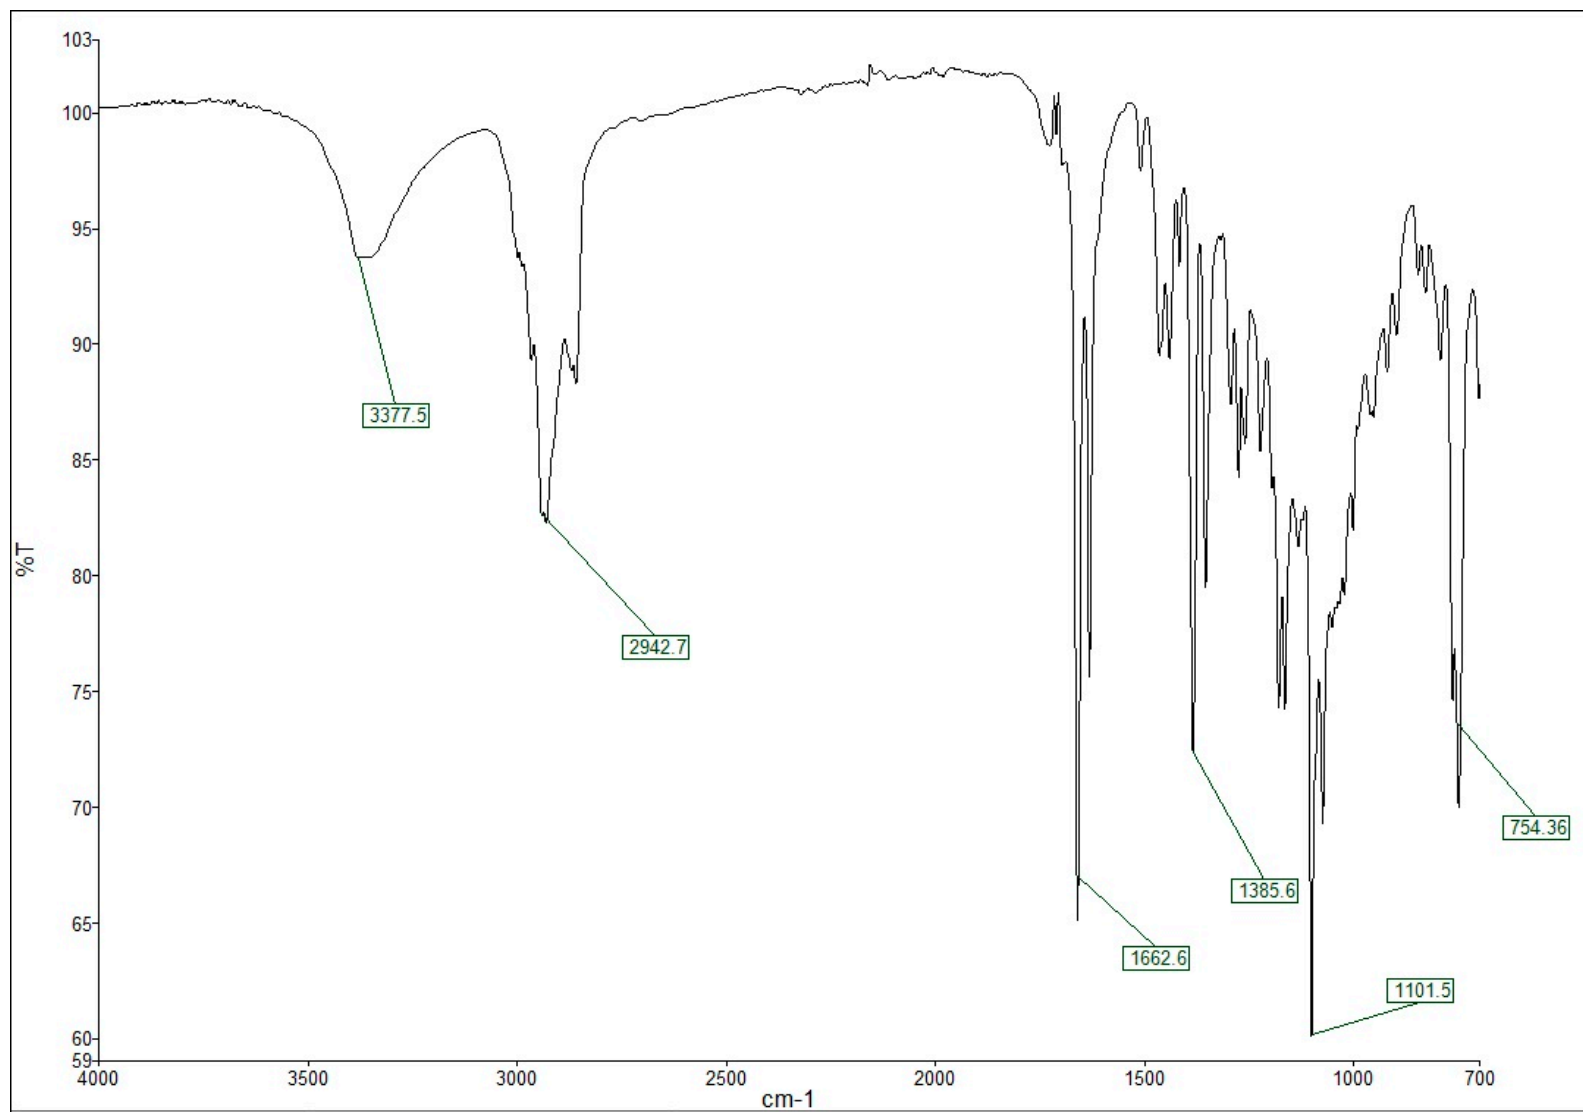

**Figure S12:** FT-IR spectrum of 3-Hydroxyfriedel-3-en-2-one (**3**)

PROTON\_05  
ZTPA203-237\_X2\_cult

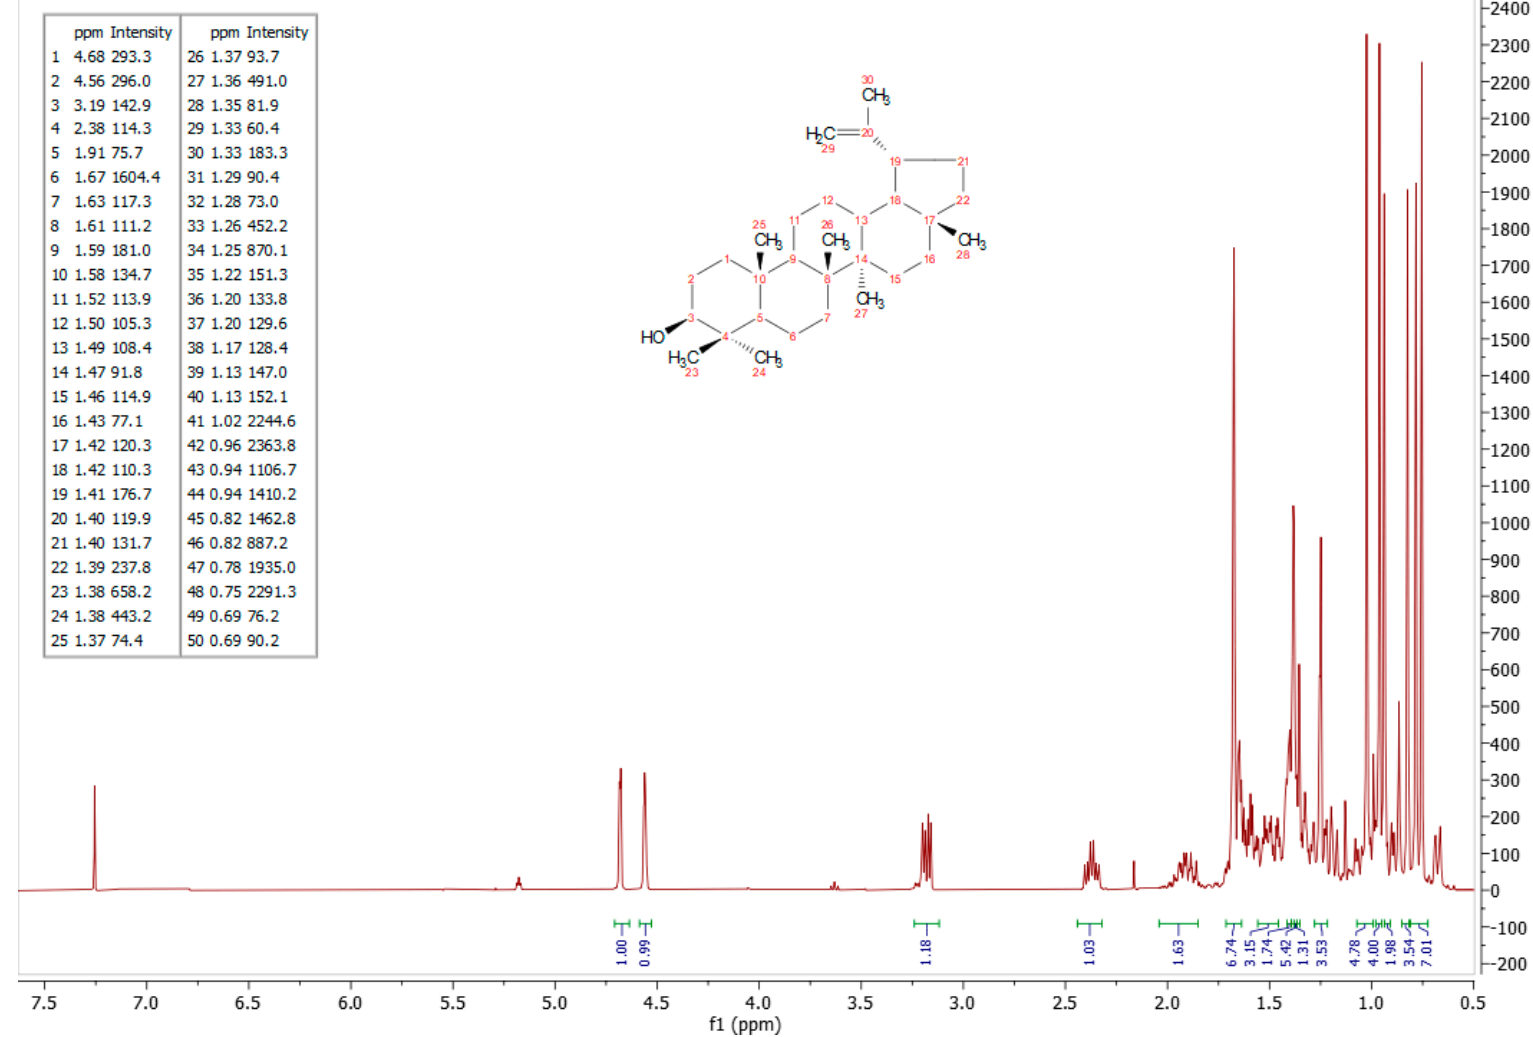

**Figure S13:**  $^1\text{H}$  NMR spectrum of lupeol (**4**) recorded in  $\text{CDCl}_3$ .

CARBON\_04  
ZTPA203-237\_X2\_cult

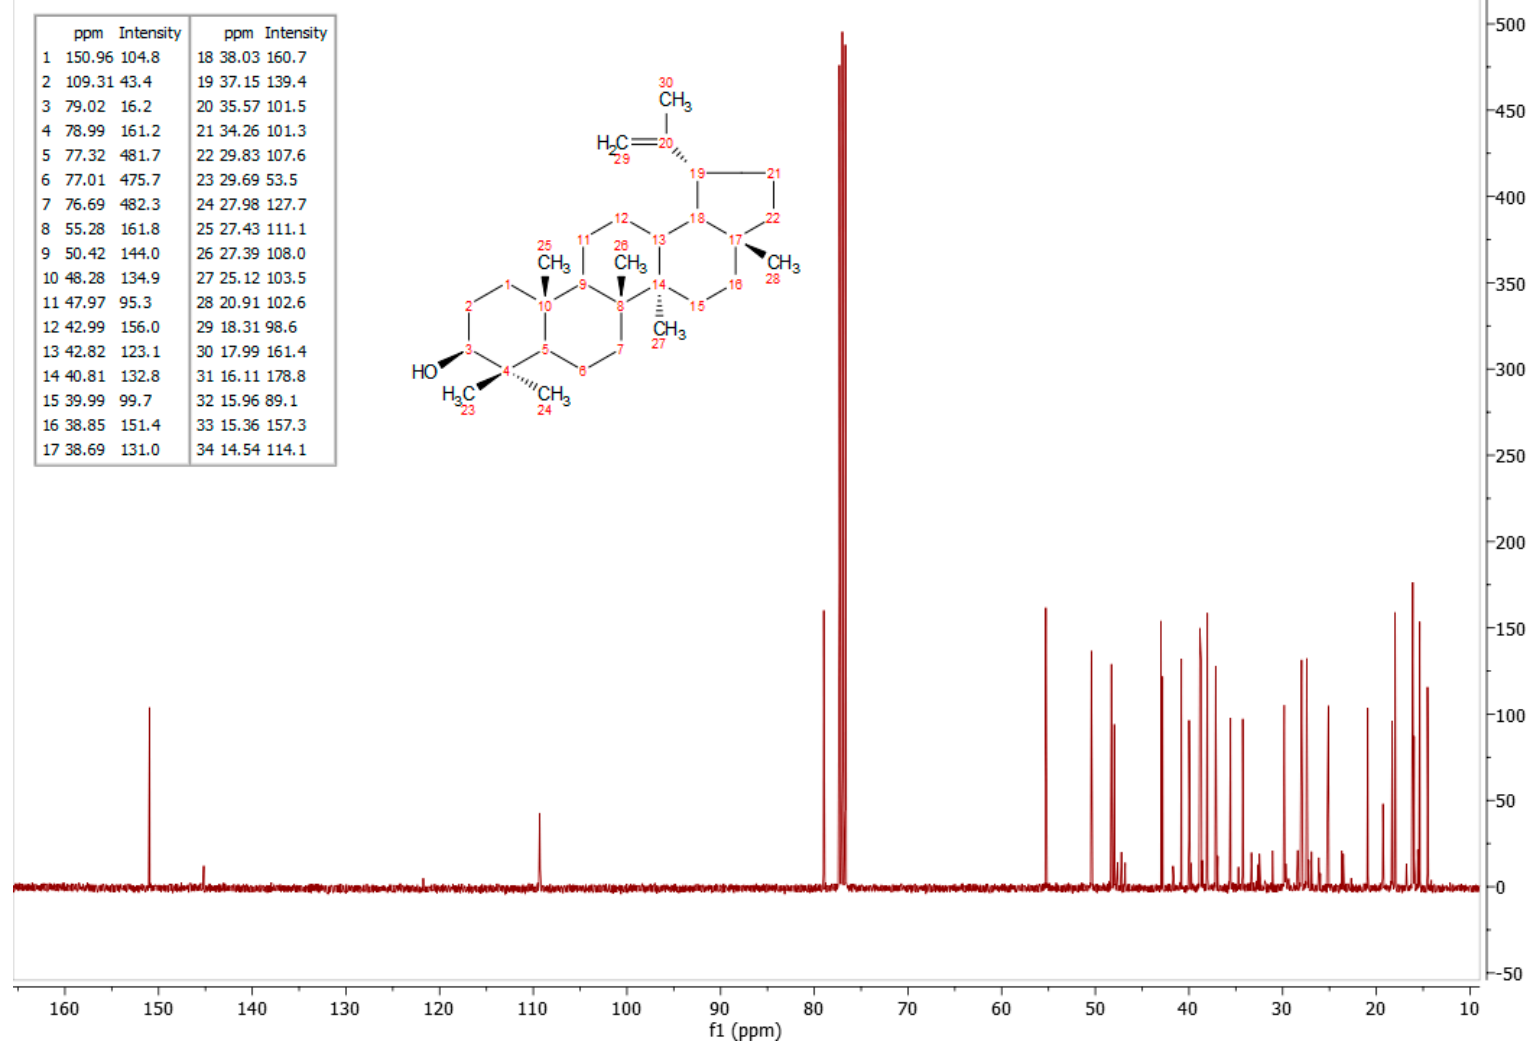

**Figure S14:**  $^{13}\text{C}$  NMR spectrum of lupeol (**4**) recorded in  $\text{CDCl}_3$ .



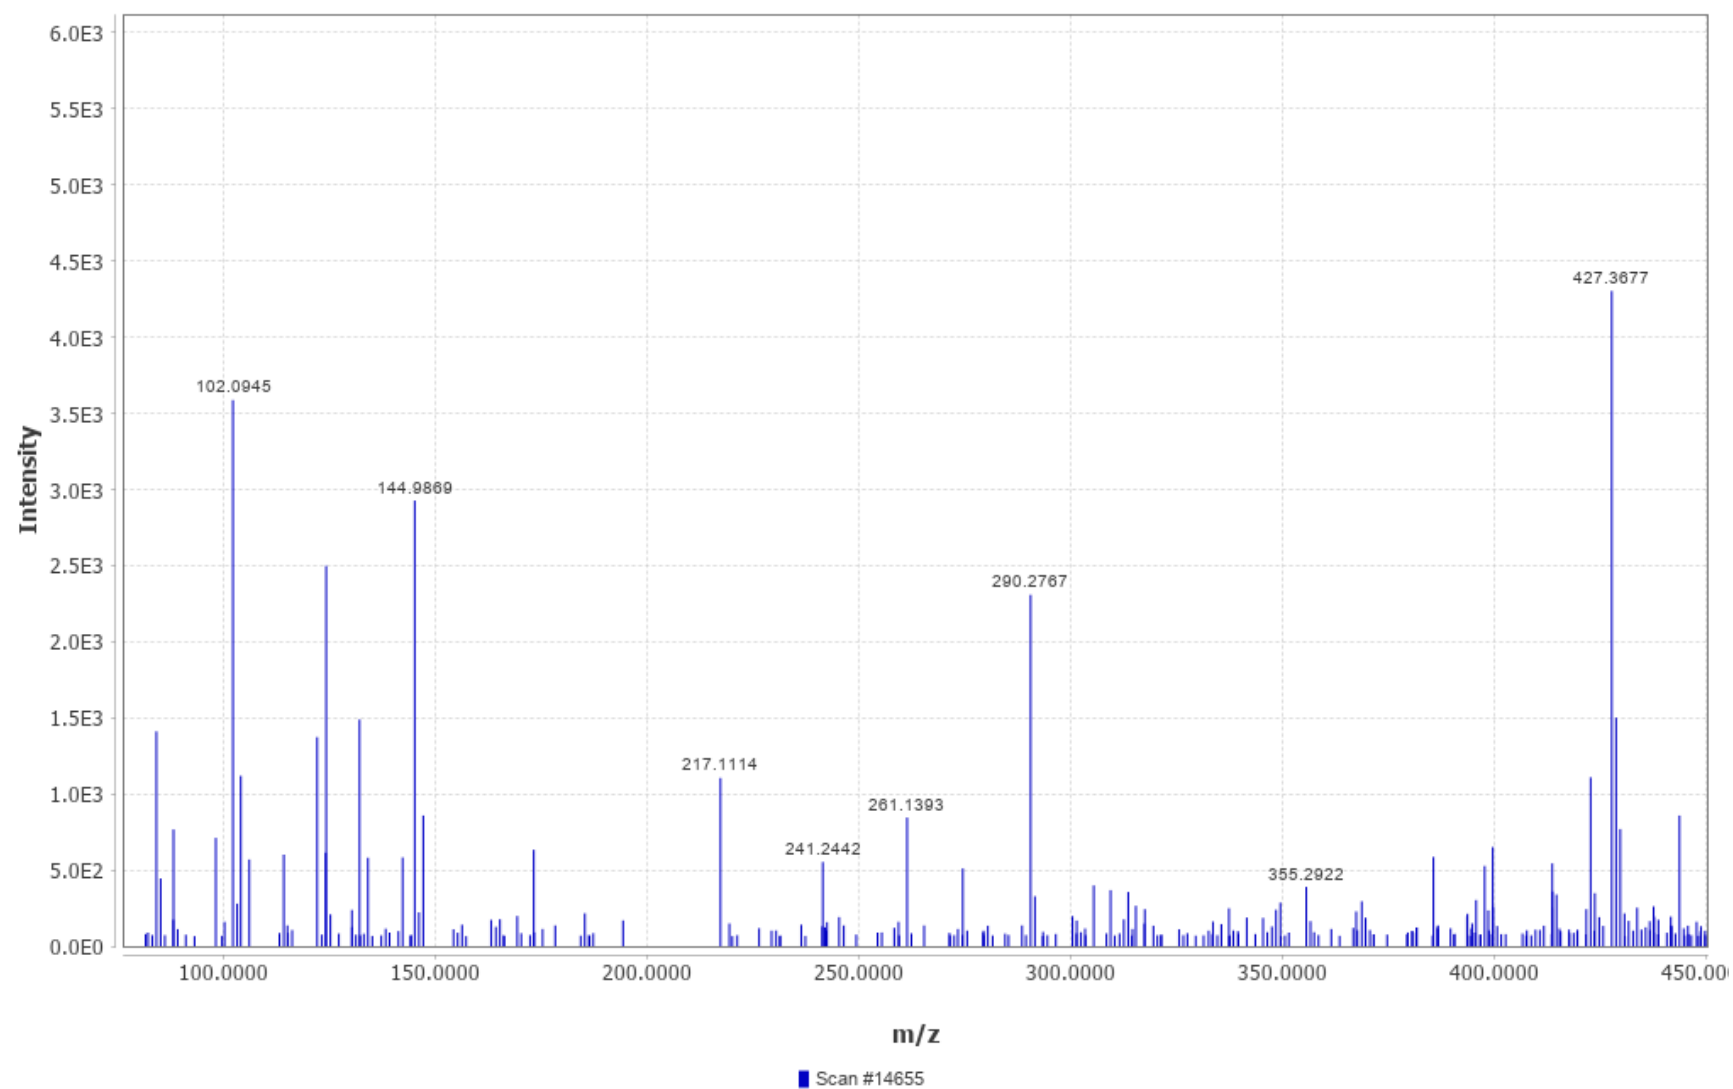

**Figure S15:** MS spectrum of lupeol (4).

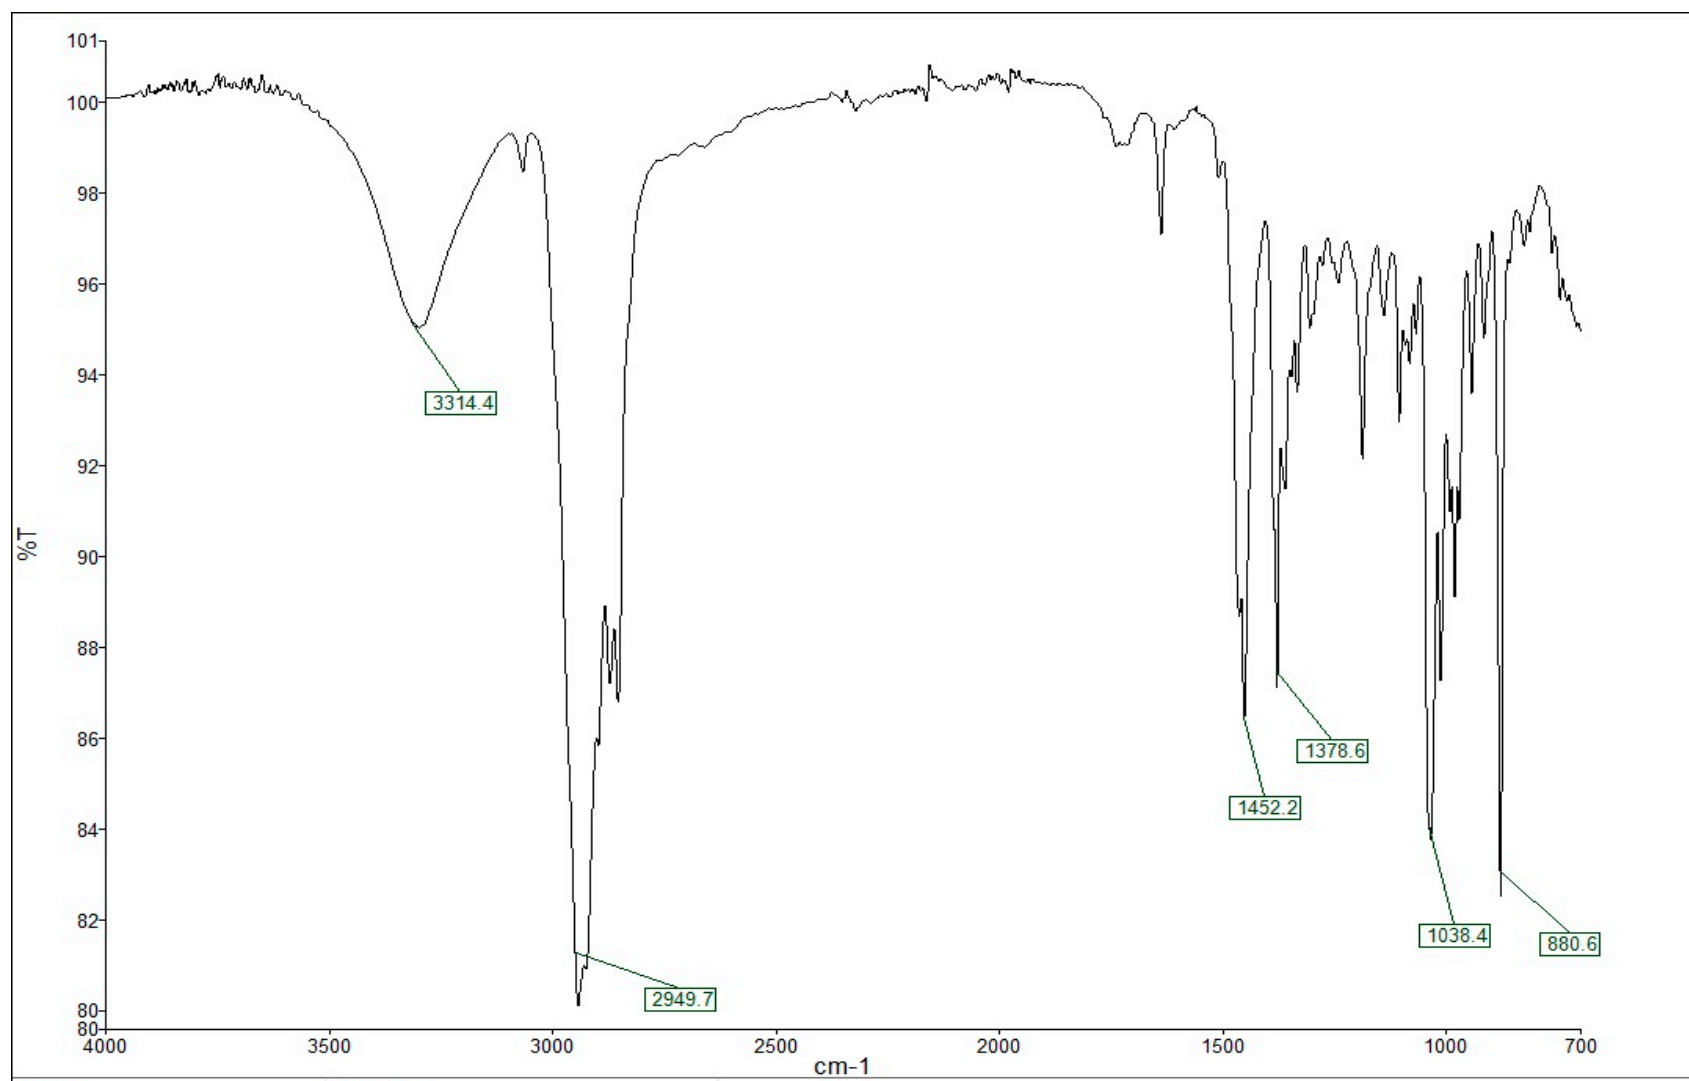

**Figure S16:** FT-IR spectrum of lupeol (**4**)

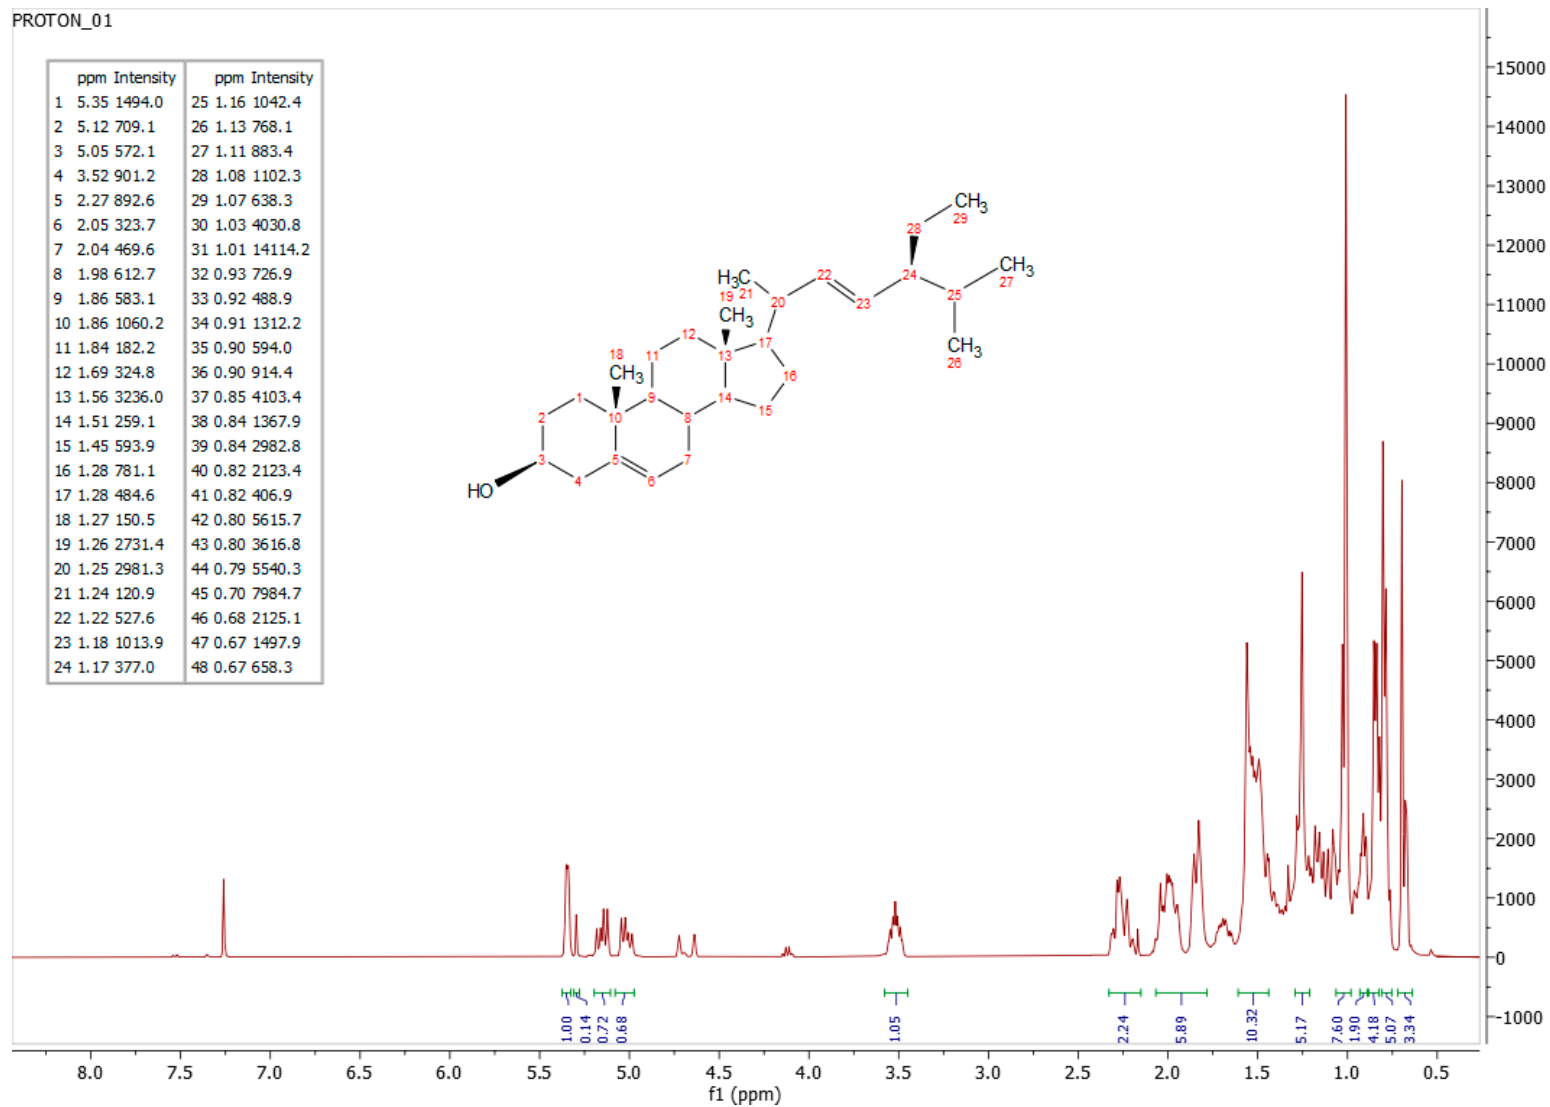

**Figure S17:**  $^1\text{H}$  NMR spectrum of stigmasterol (**5**) recorded in  $\text{CDCl}_3$ .

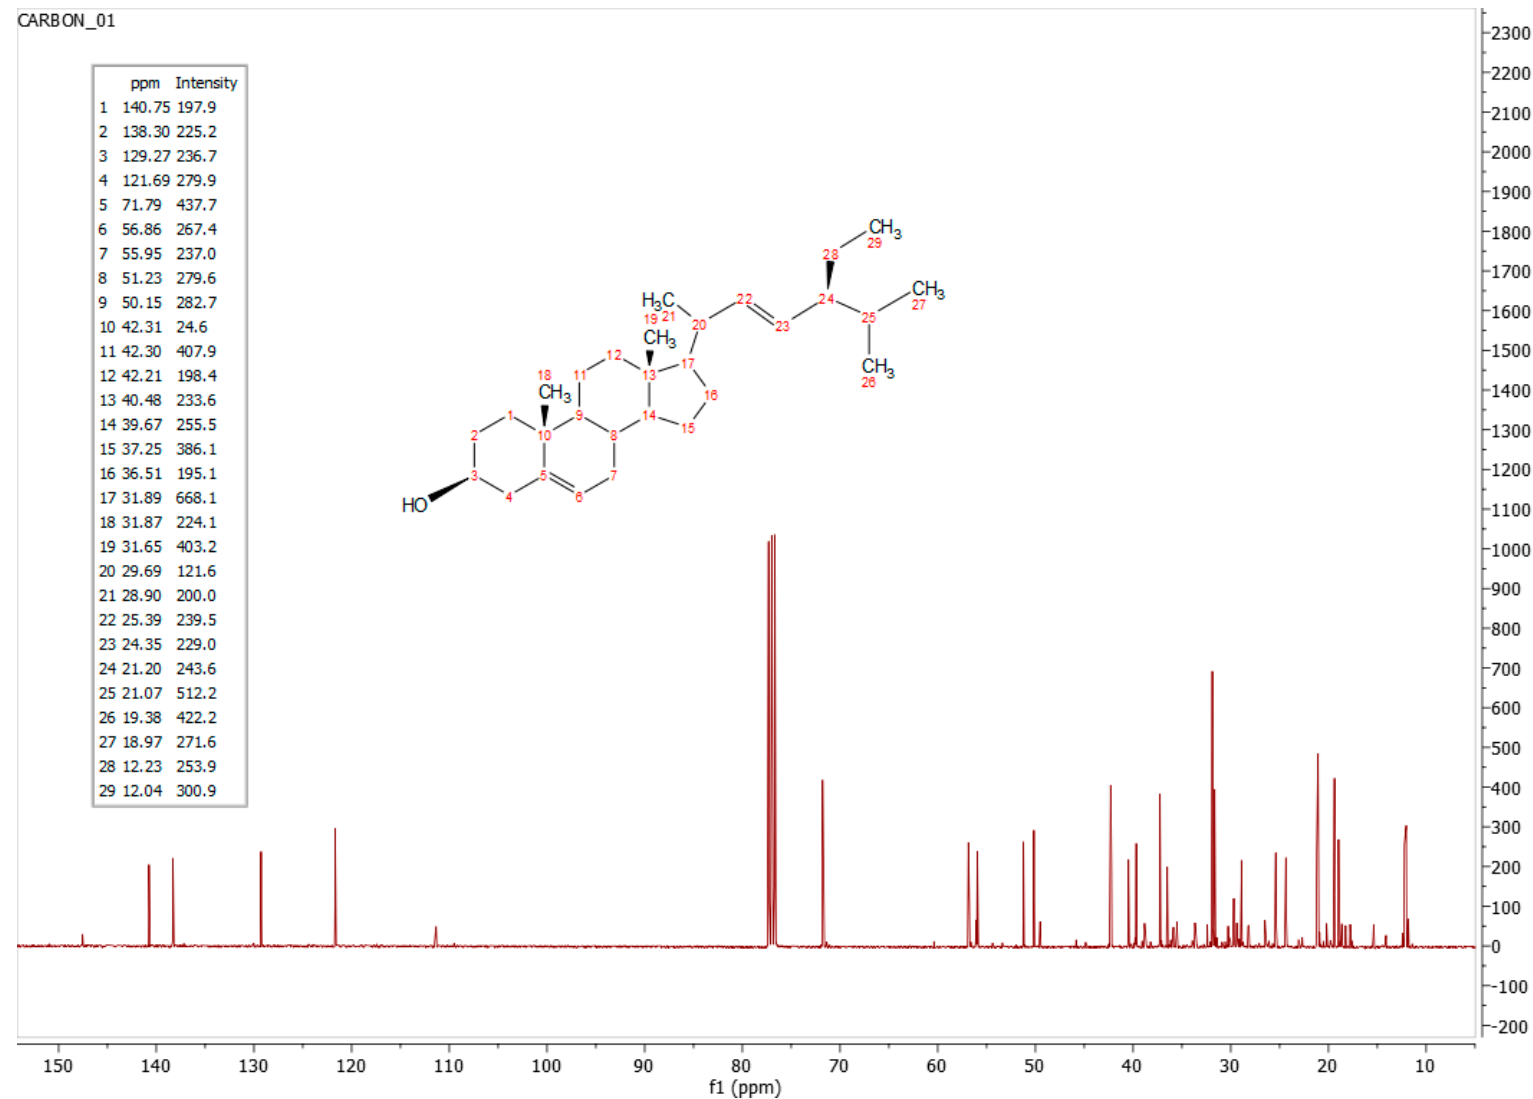

**Figure S18:**  $^{13}\text{C}$  NMR spectrum of stigmasterol (**5**) recorded in  $\text{CDCl}_3$

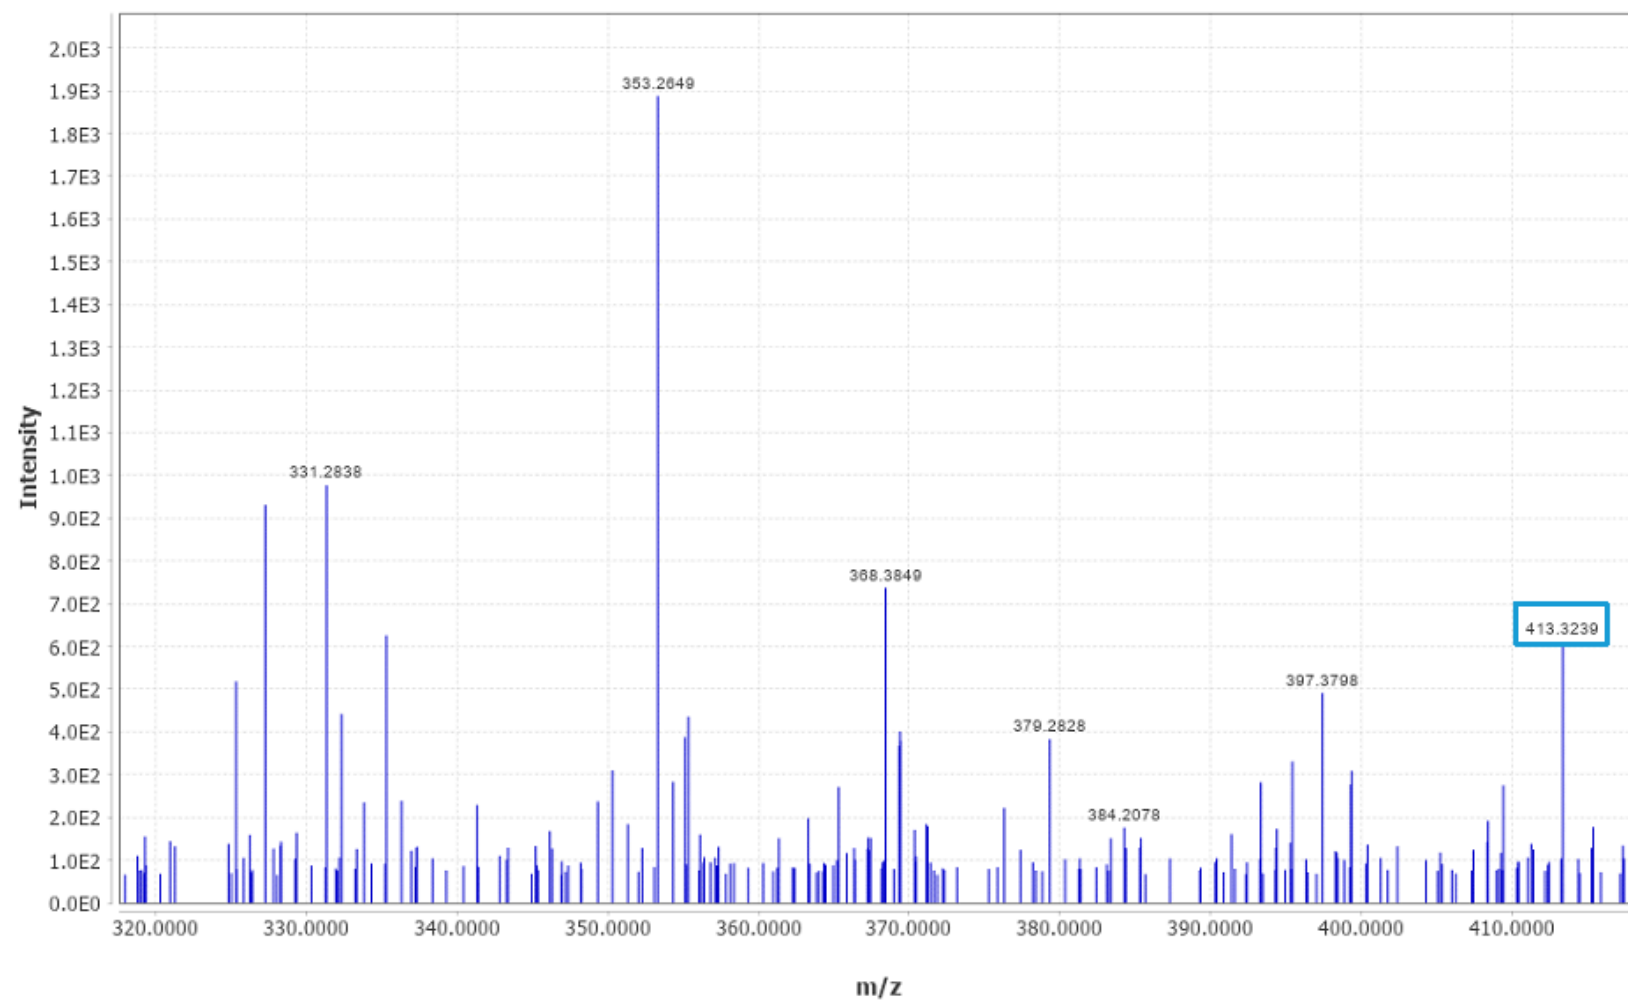

**Figure S19:** MS spectrum of stigmasterol (5).

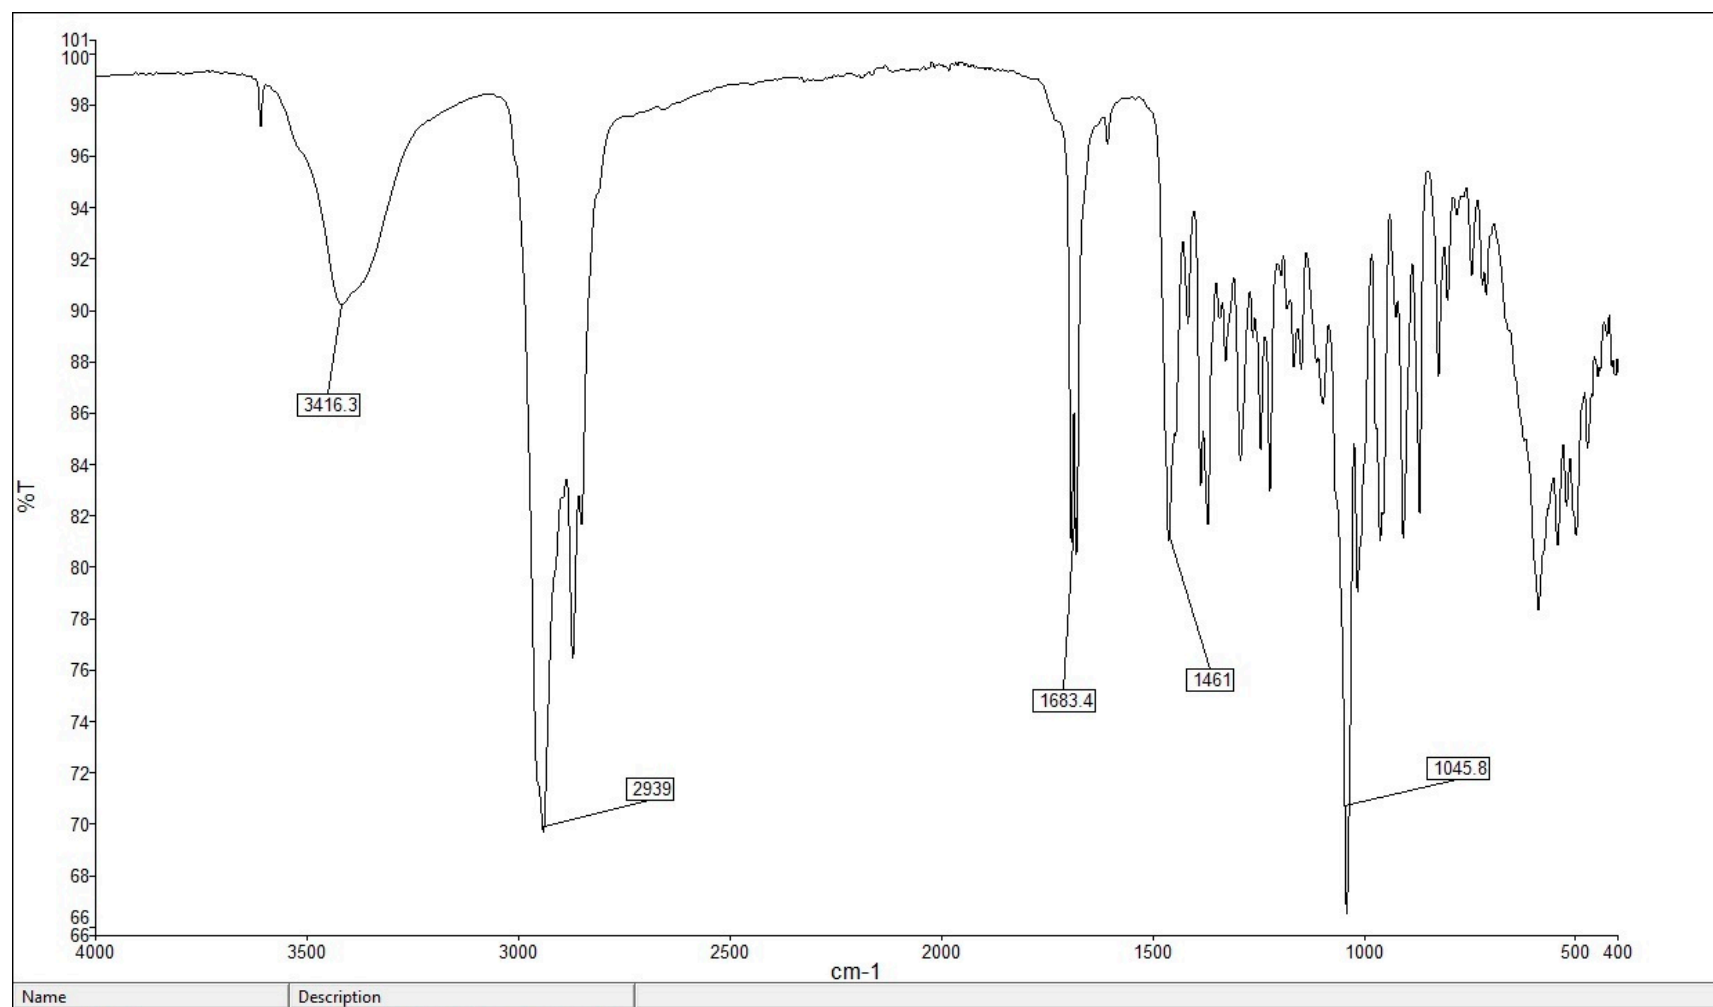

**Figure S20:** FT-IR spectrum of stigmasterol (**5**)

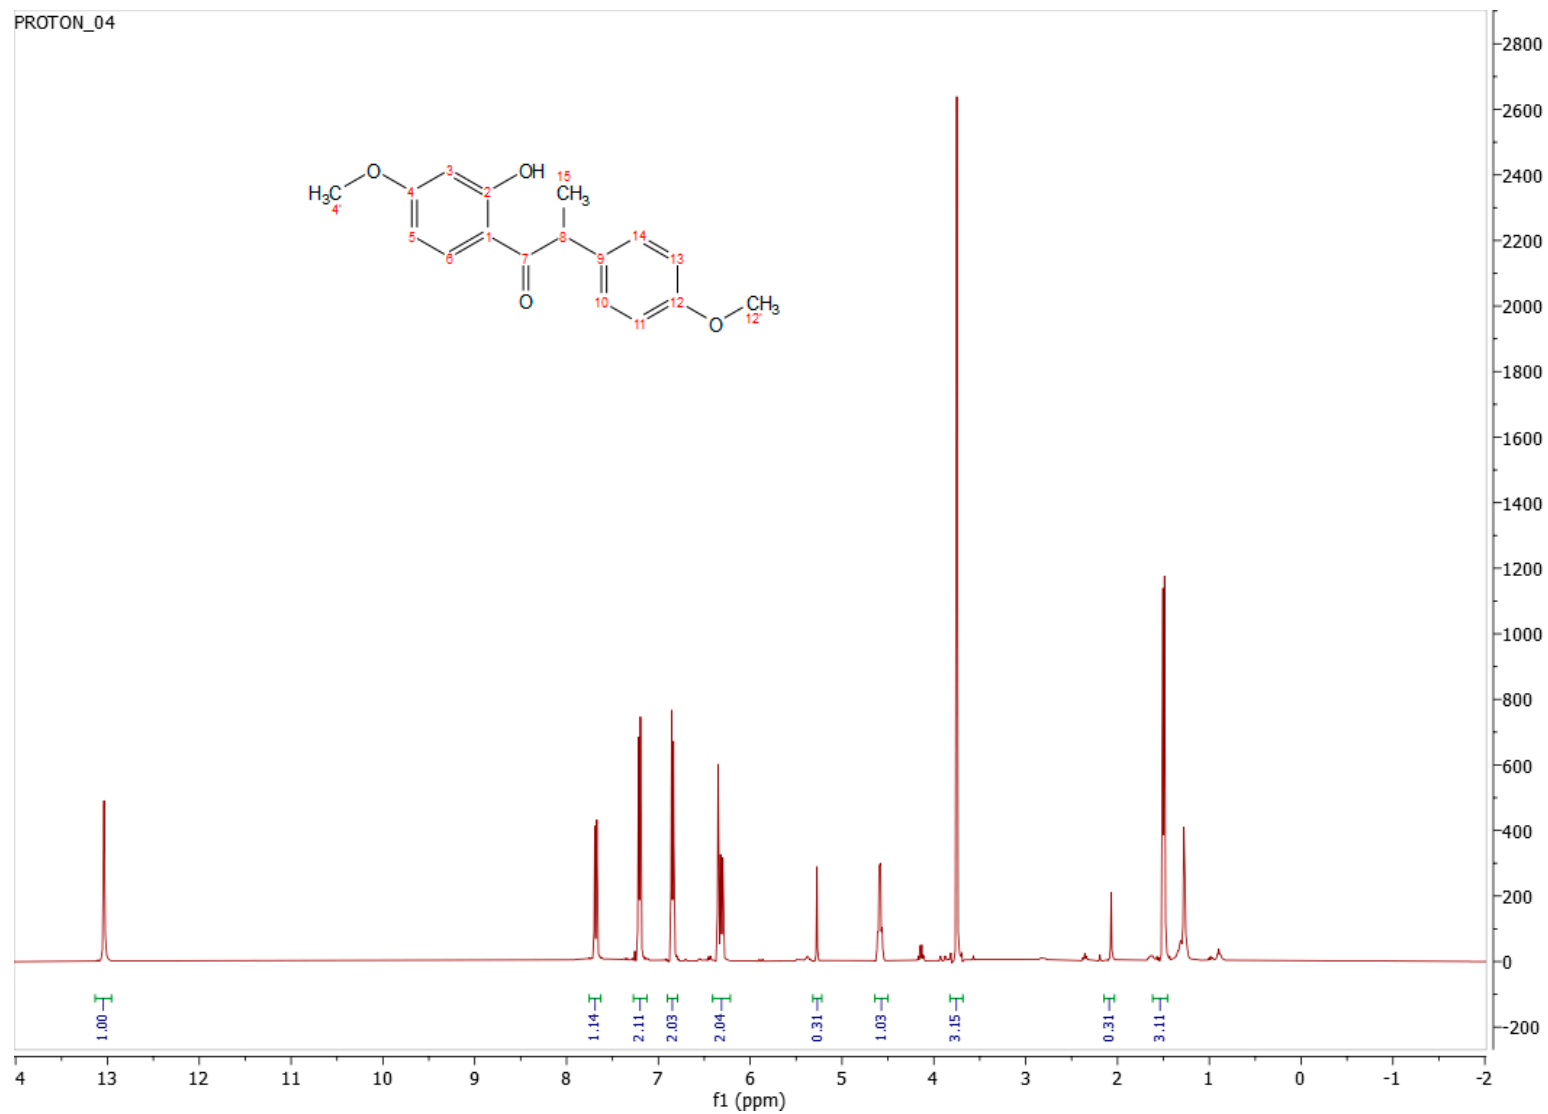

**Figure S21:** <sup>1</sup>H NMR spectrum of (±)-4-O-Methylangolensin (**6**) recorded in CDCl<sub>3</sub>.

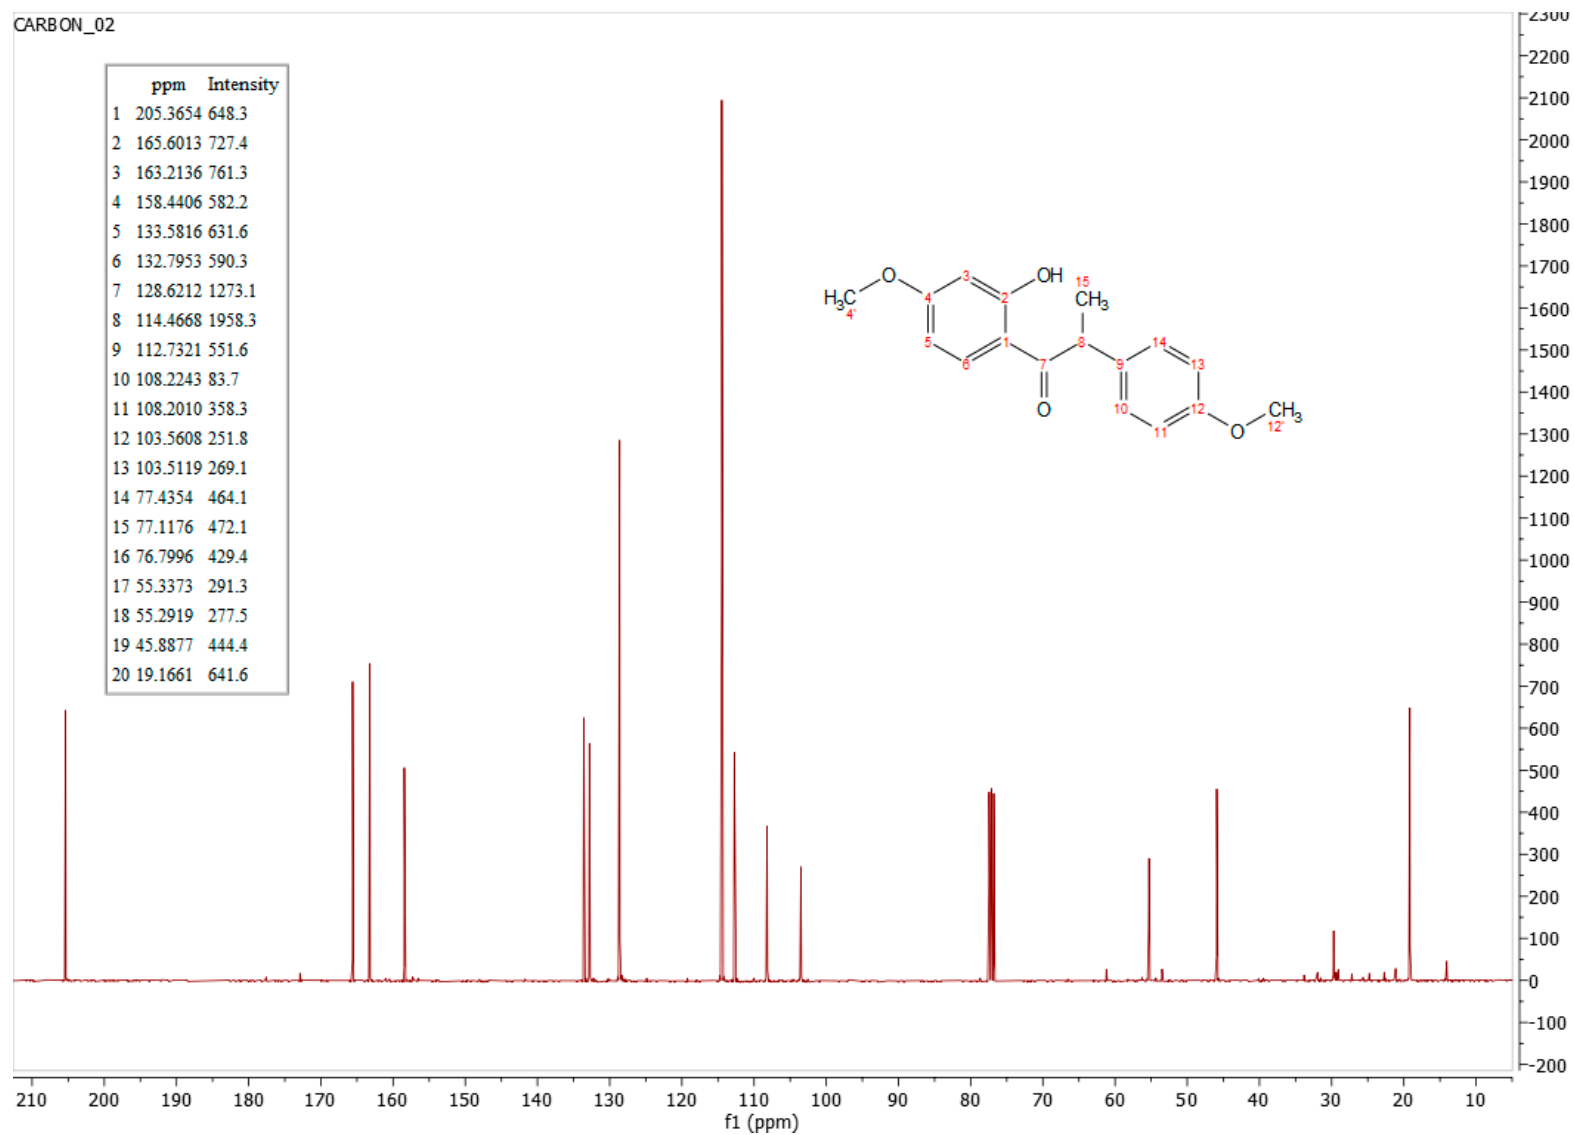

**Figure S22:**  $^{13}\text{C}$  NMR spectrum of (±) -4-O-Methylangolensin (**6**) recorded in  $\text{CDCl}_3$



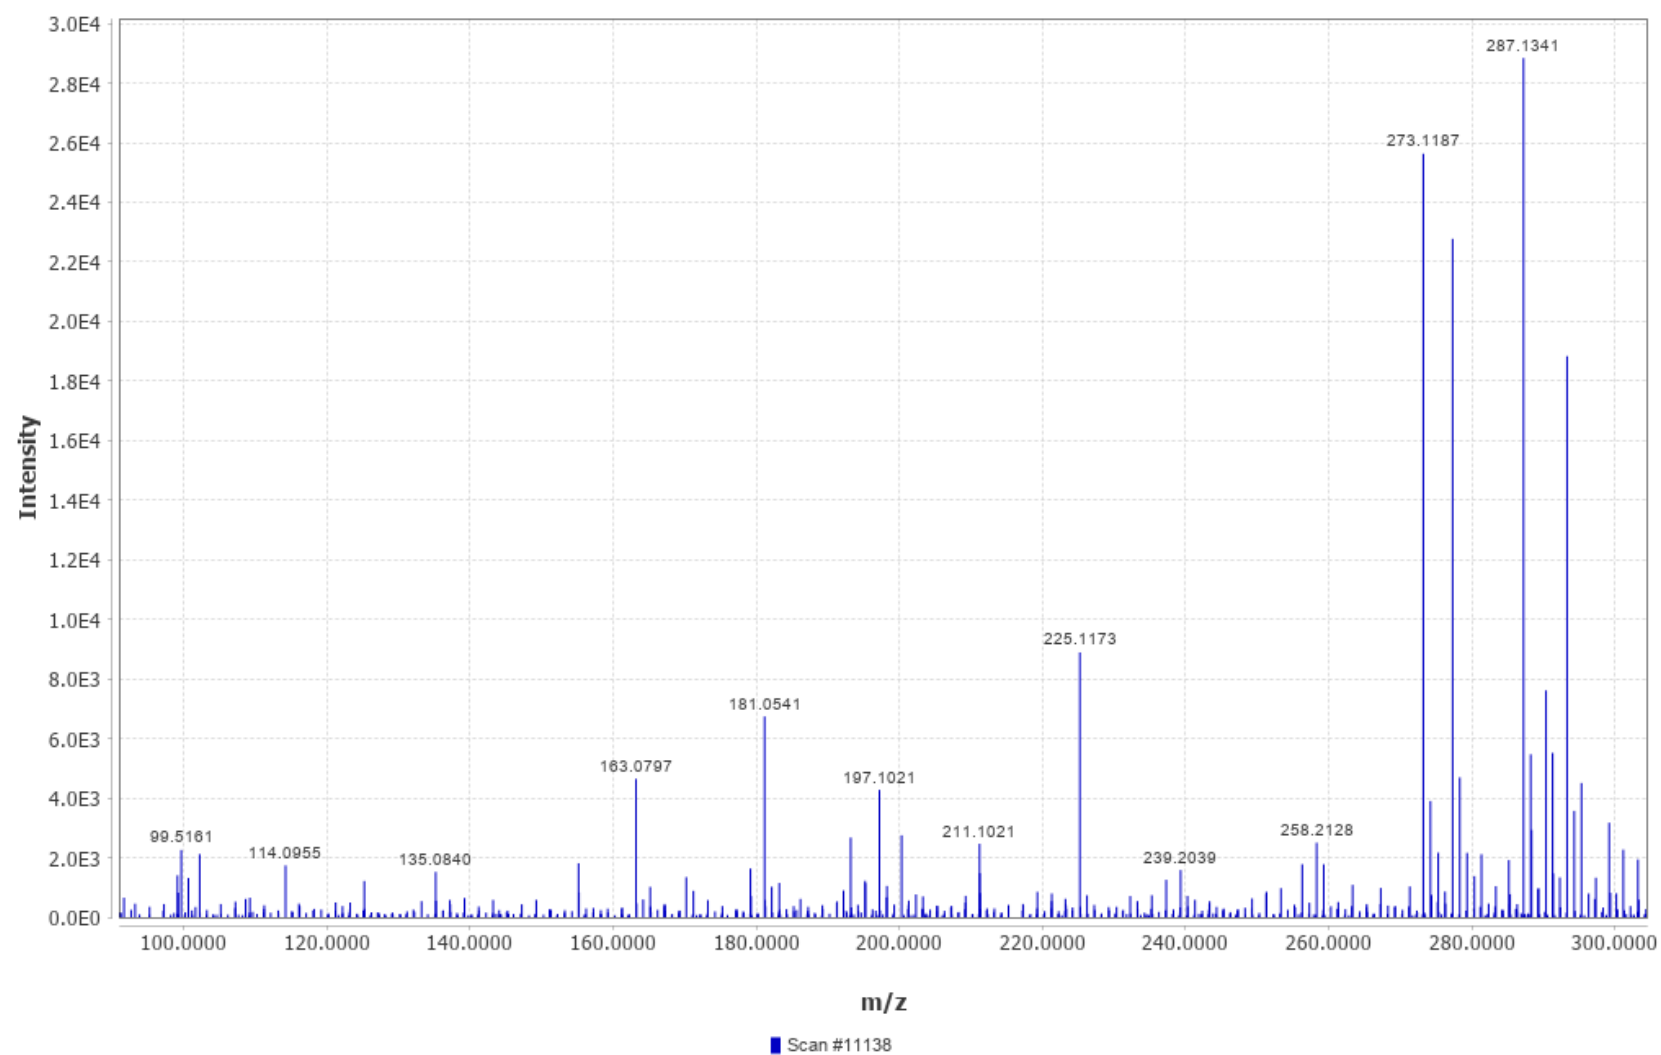

**Figure S23:** MS spectrum of (±)-4-O-Methylangolensin (**6**).

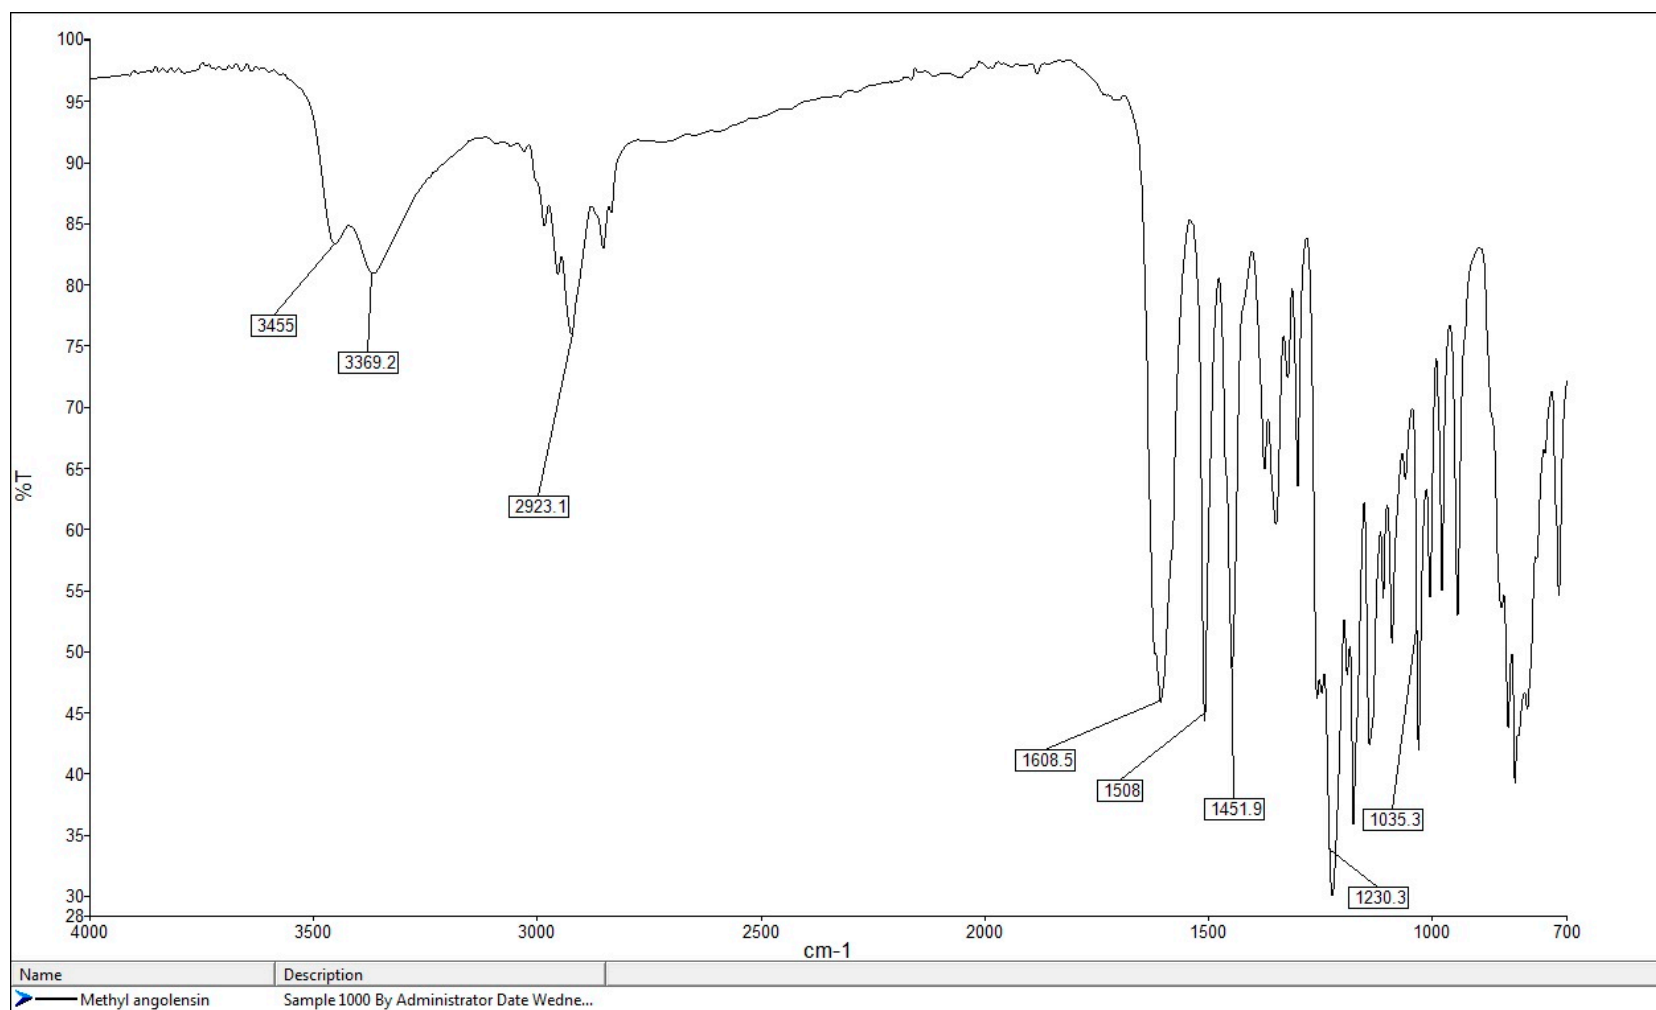

**Figure S24:** FT-IR spectrum of (±)-4-O-Methylangolensin (7).

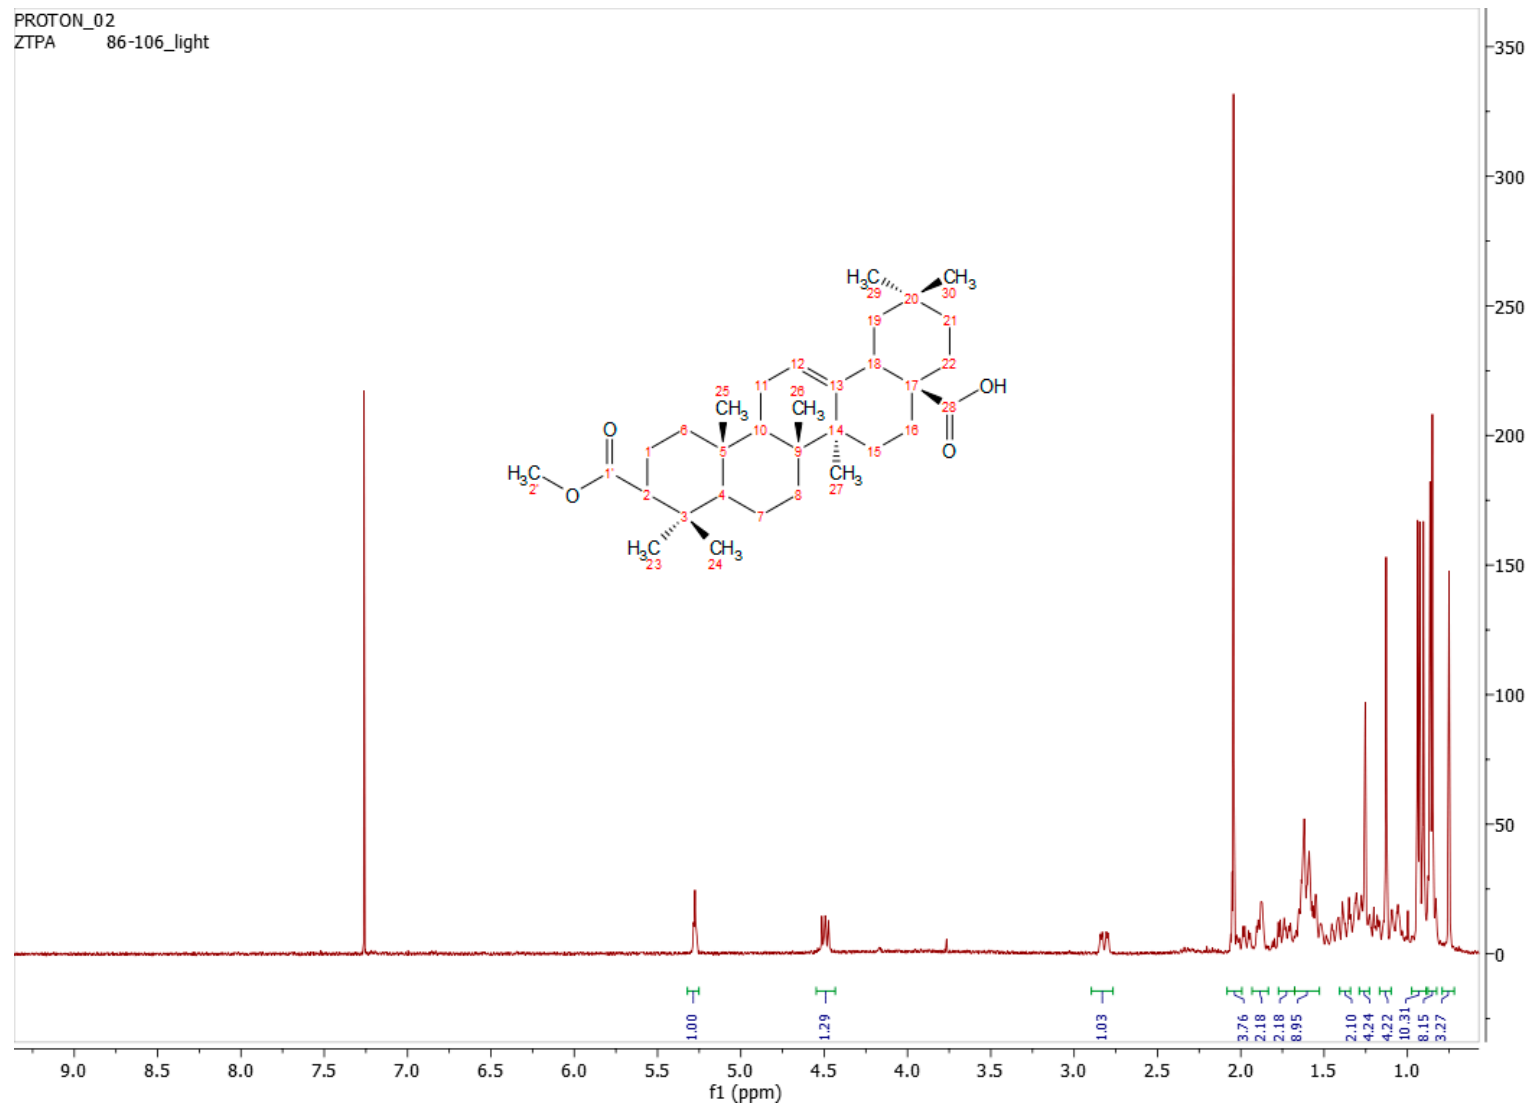

**Figure S25:**  $^1\text{H}$  NMR spectrum of Oleanolic acid acetate (**7**) recorded in  $\text{CDCl}_3$ .

CARBON\_03  
ZTPA\_Hex\_86-106\_light

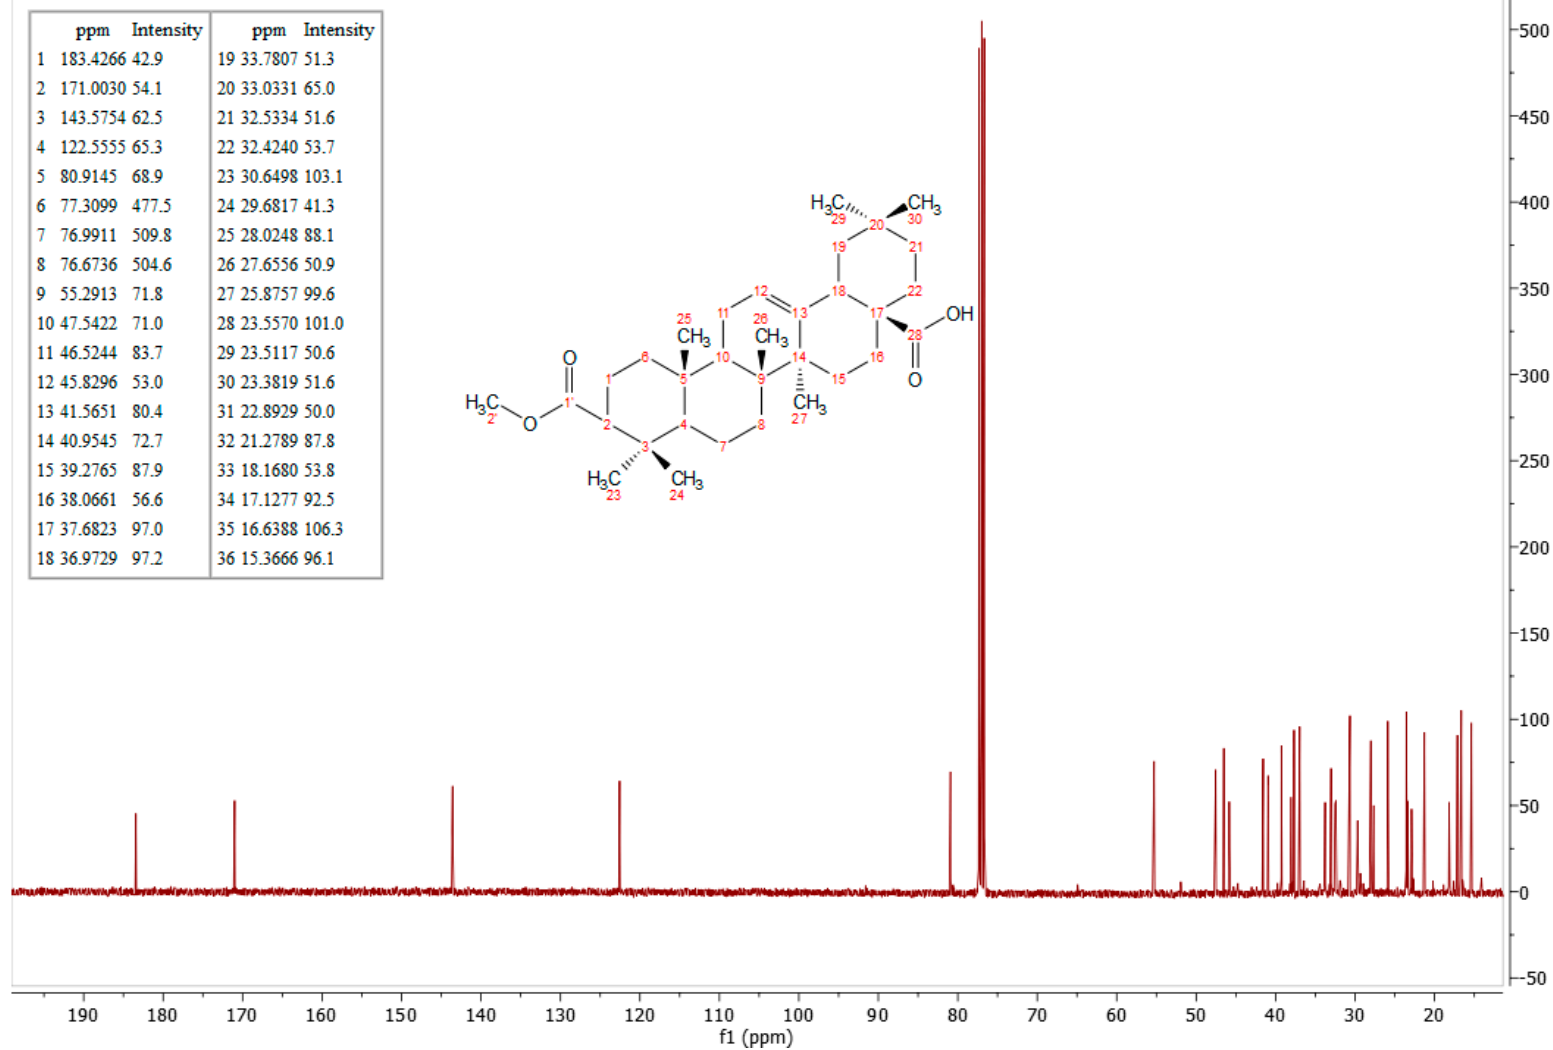

**Figure S26:**  $^{13}\text{C}$  NMR spectrum of Oleanolic acid acetate (7) recorded in  $\text{CDCl}_3$

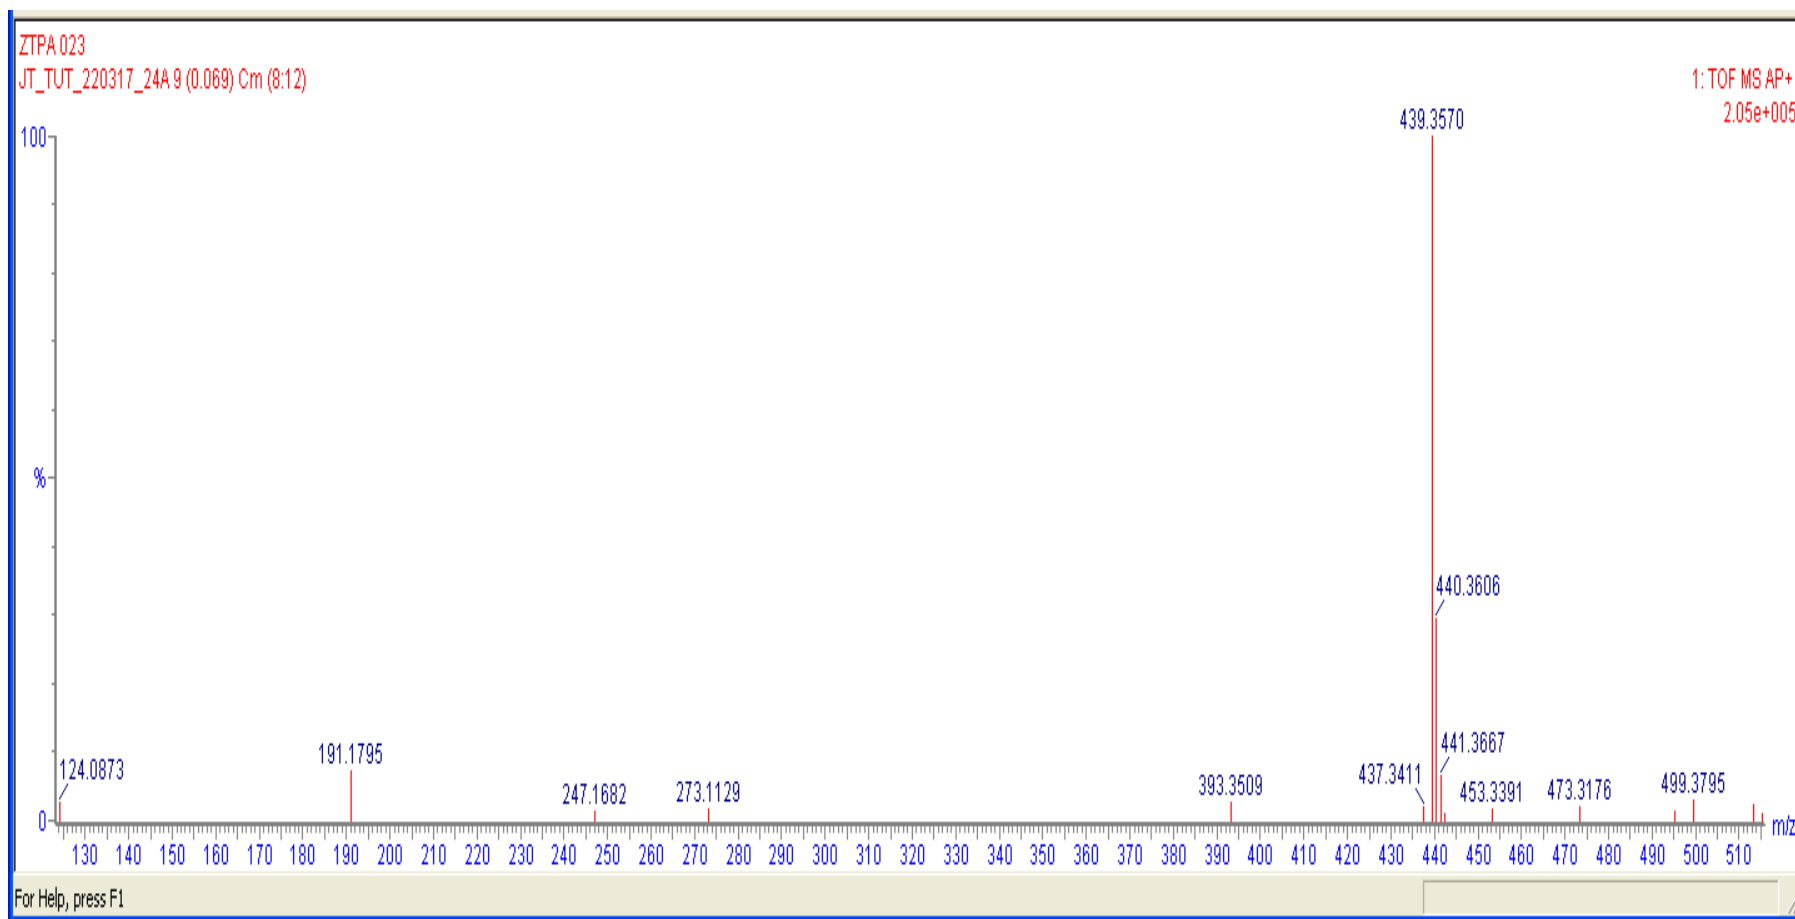

**Figure S27:** MS spectrum of Oleanolic acid acetate (**7**).

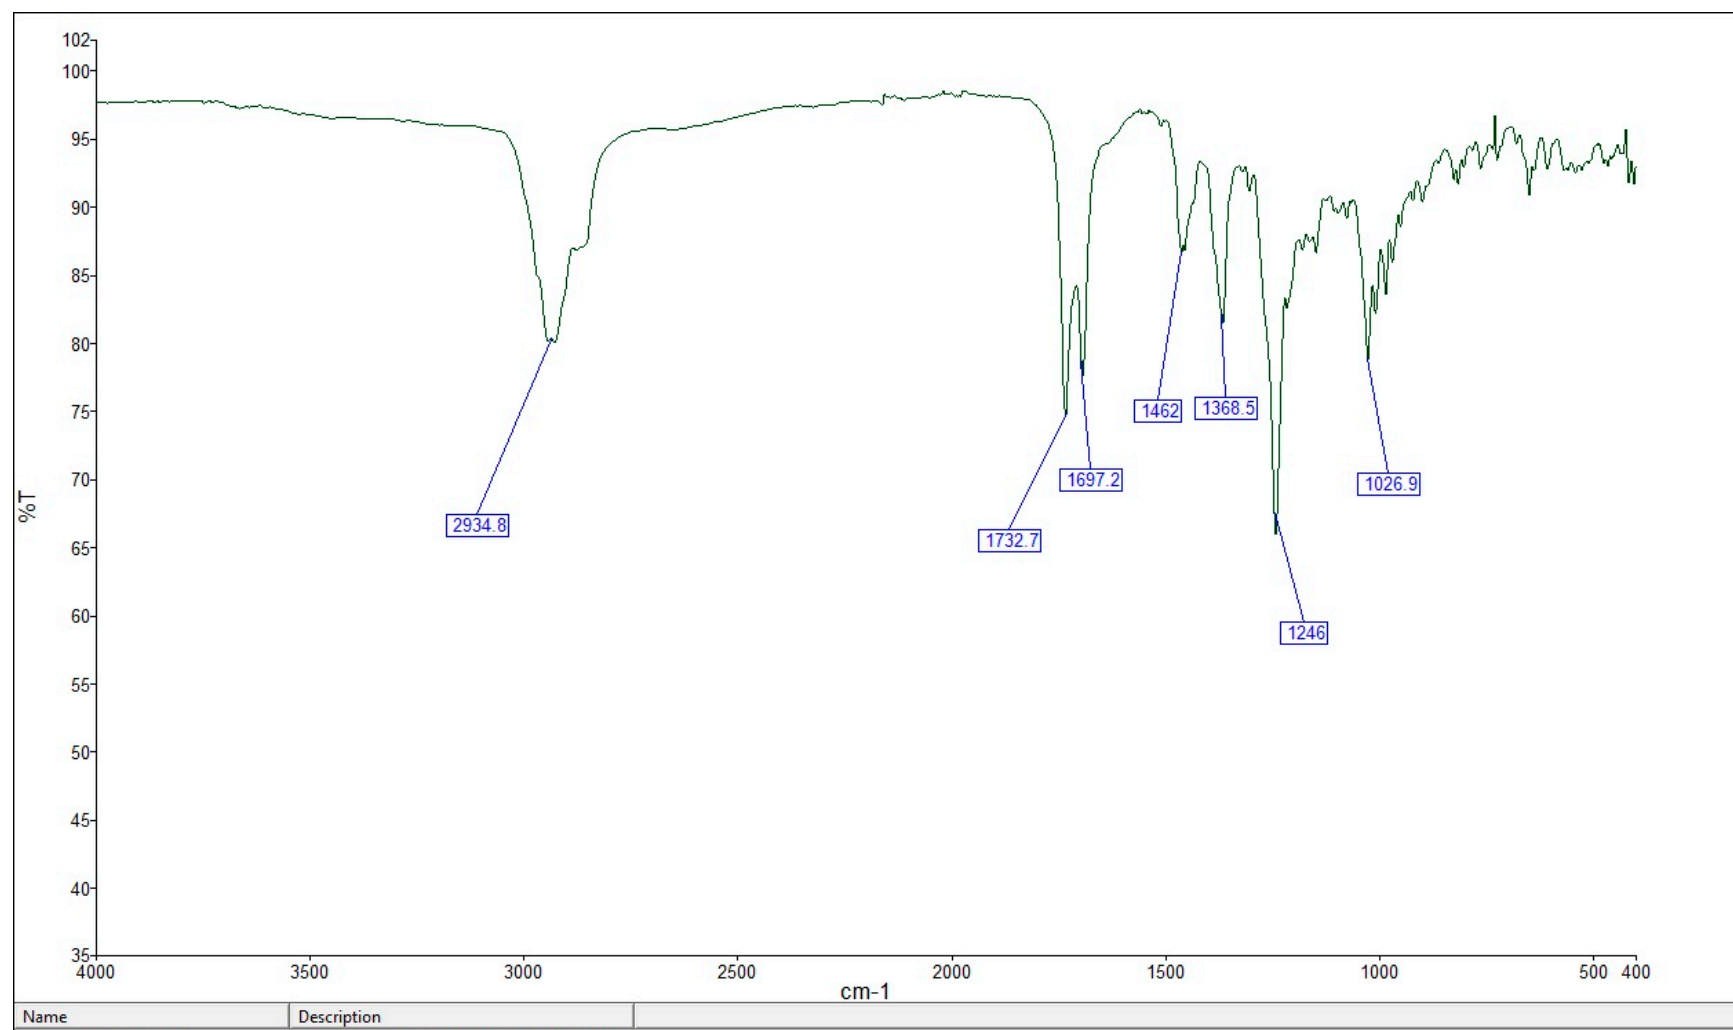

**Figure S28:** FT-IR spectrum of Oleanolic acid acetate (**7**).

PROTON\_06  
ZTPA266-274\_2\_new\_cult

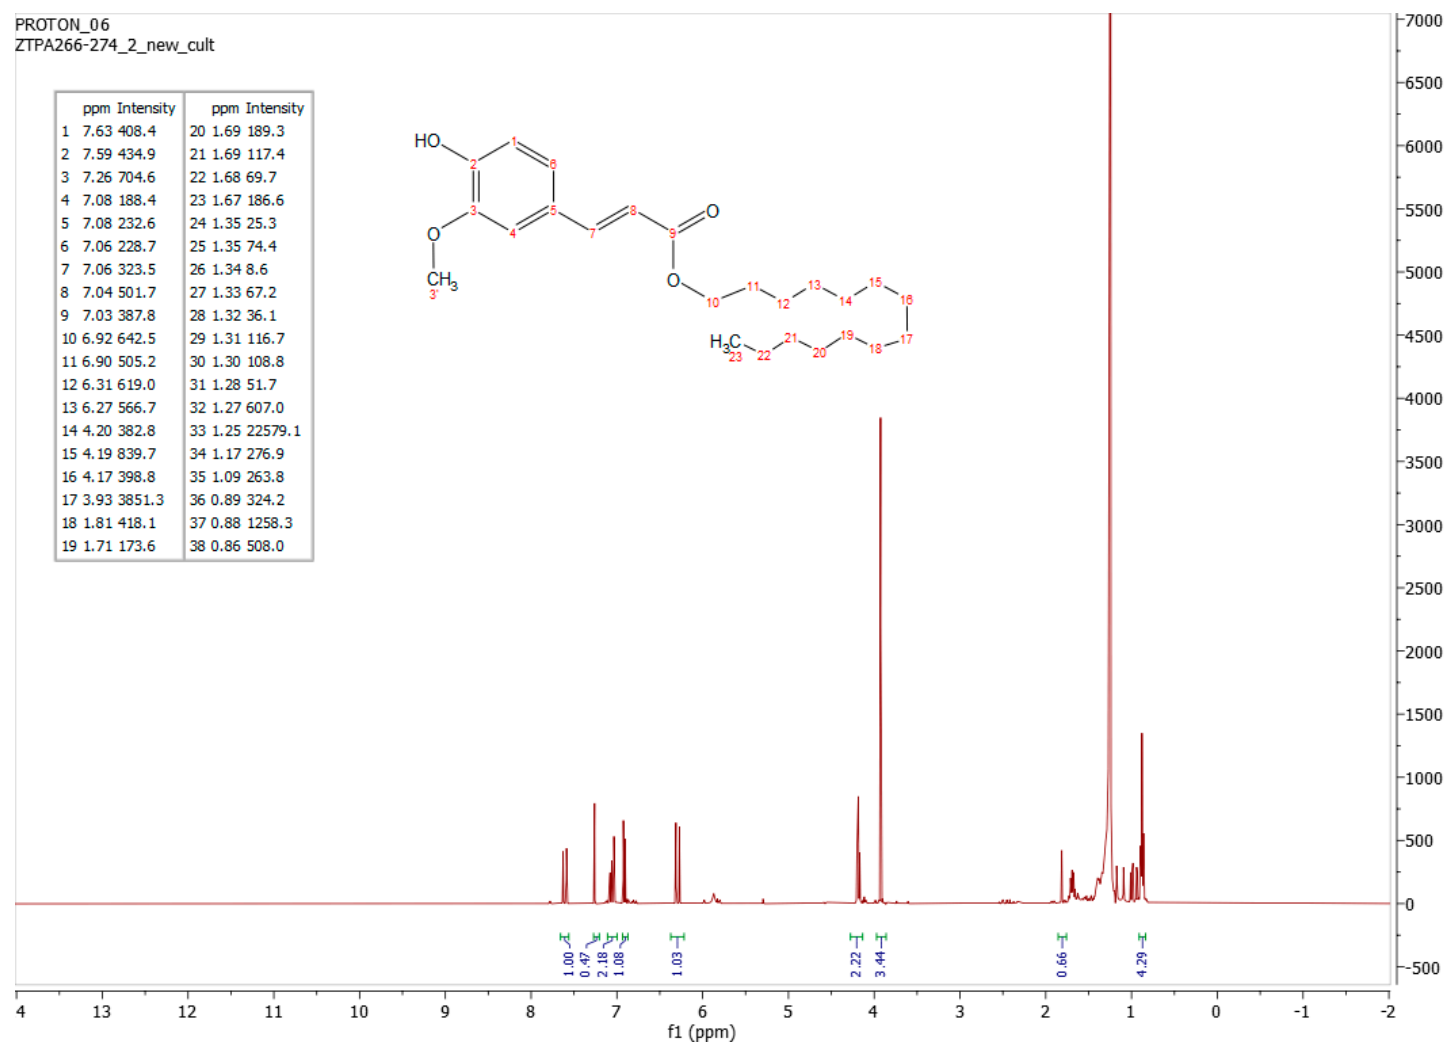

**Figure S29:**  $^1\text{H}$  NMR spectrum of Tetradecyl (E)-ferulate (**8**) recorded in  $\text{CDCl}_3$ .

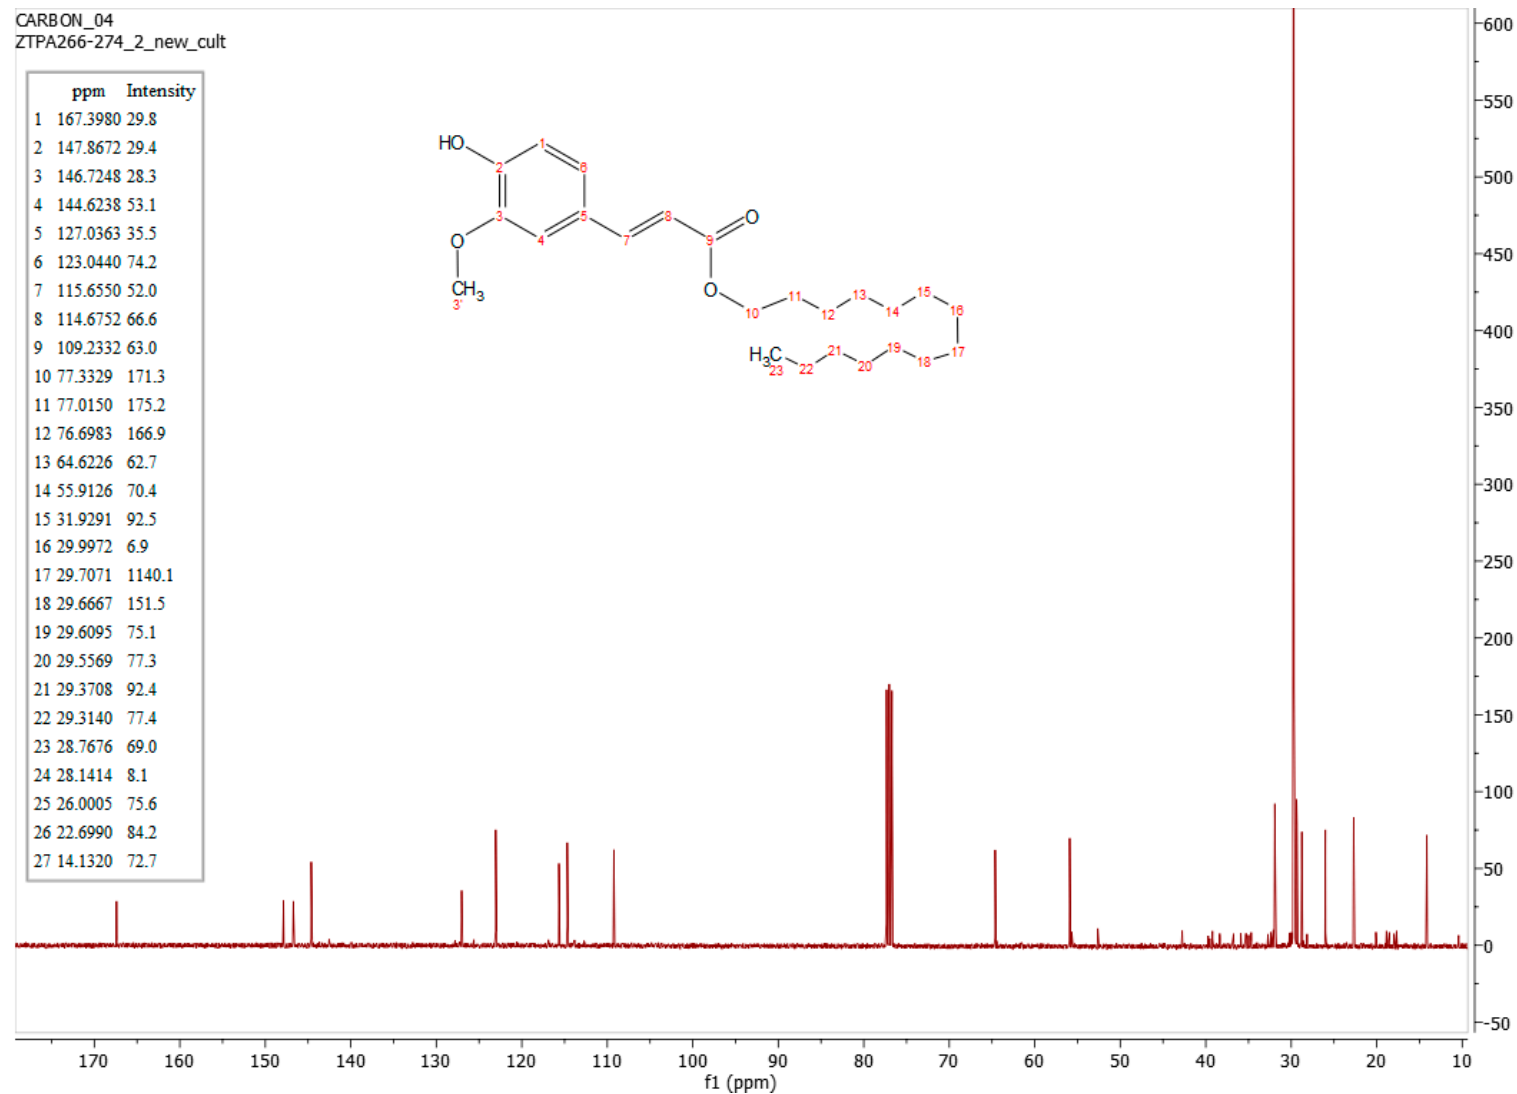

**Figure S30:**  $^{13}\text{C}$  NMR spectrum of Tetradecyl (E)-ferulate (**8**) recorded in  $\text{CDCl}_3$



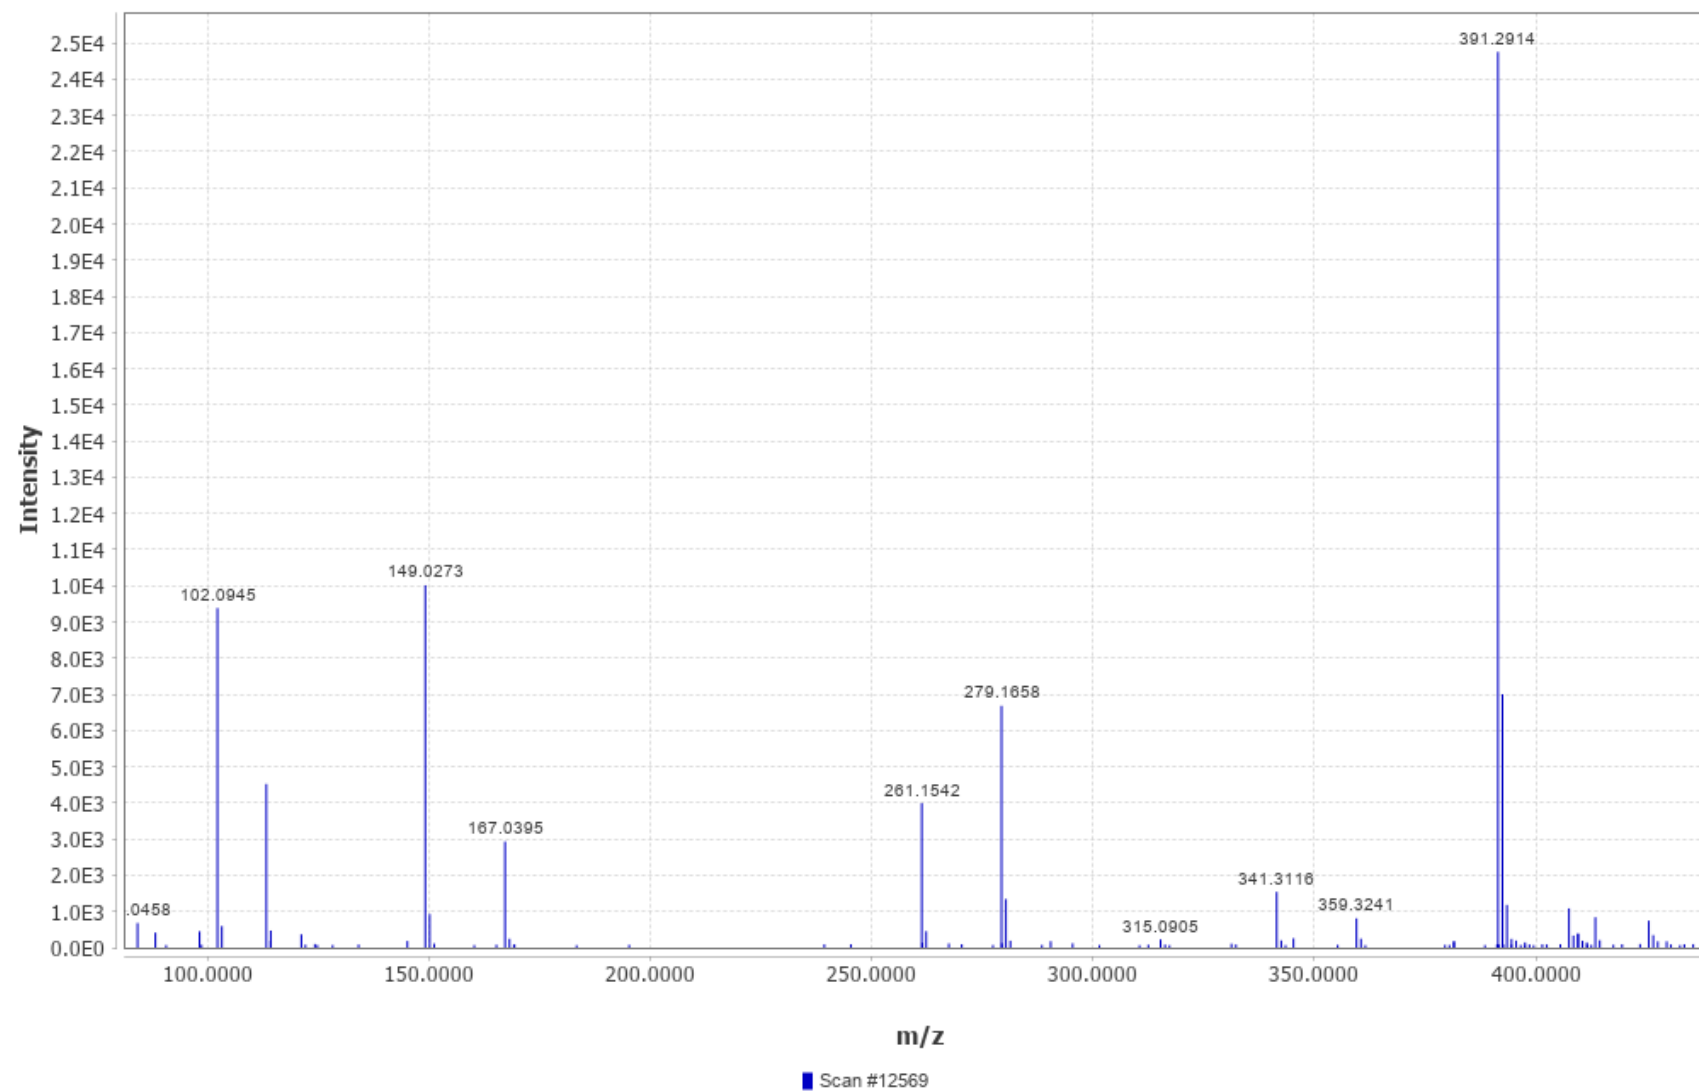

**Figure S31:** MS spectrum of Tetradecyl (E)-ferulate (**8**).

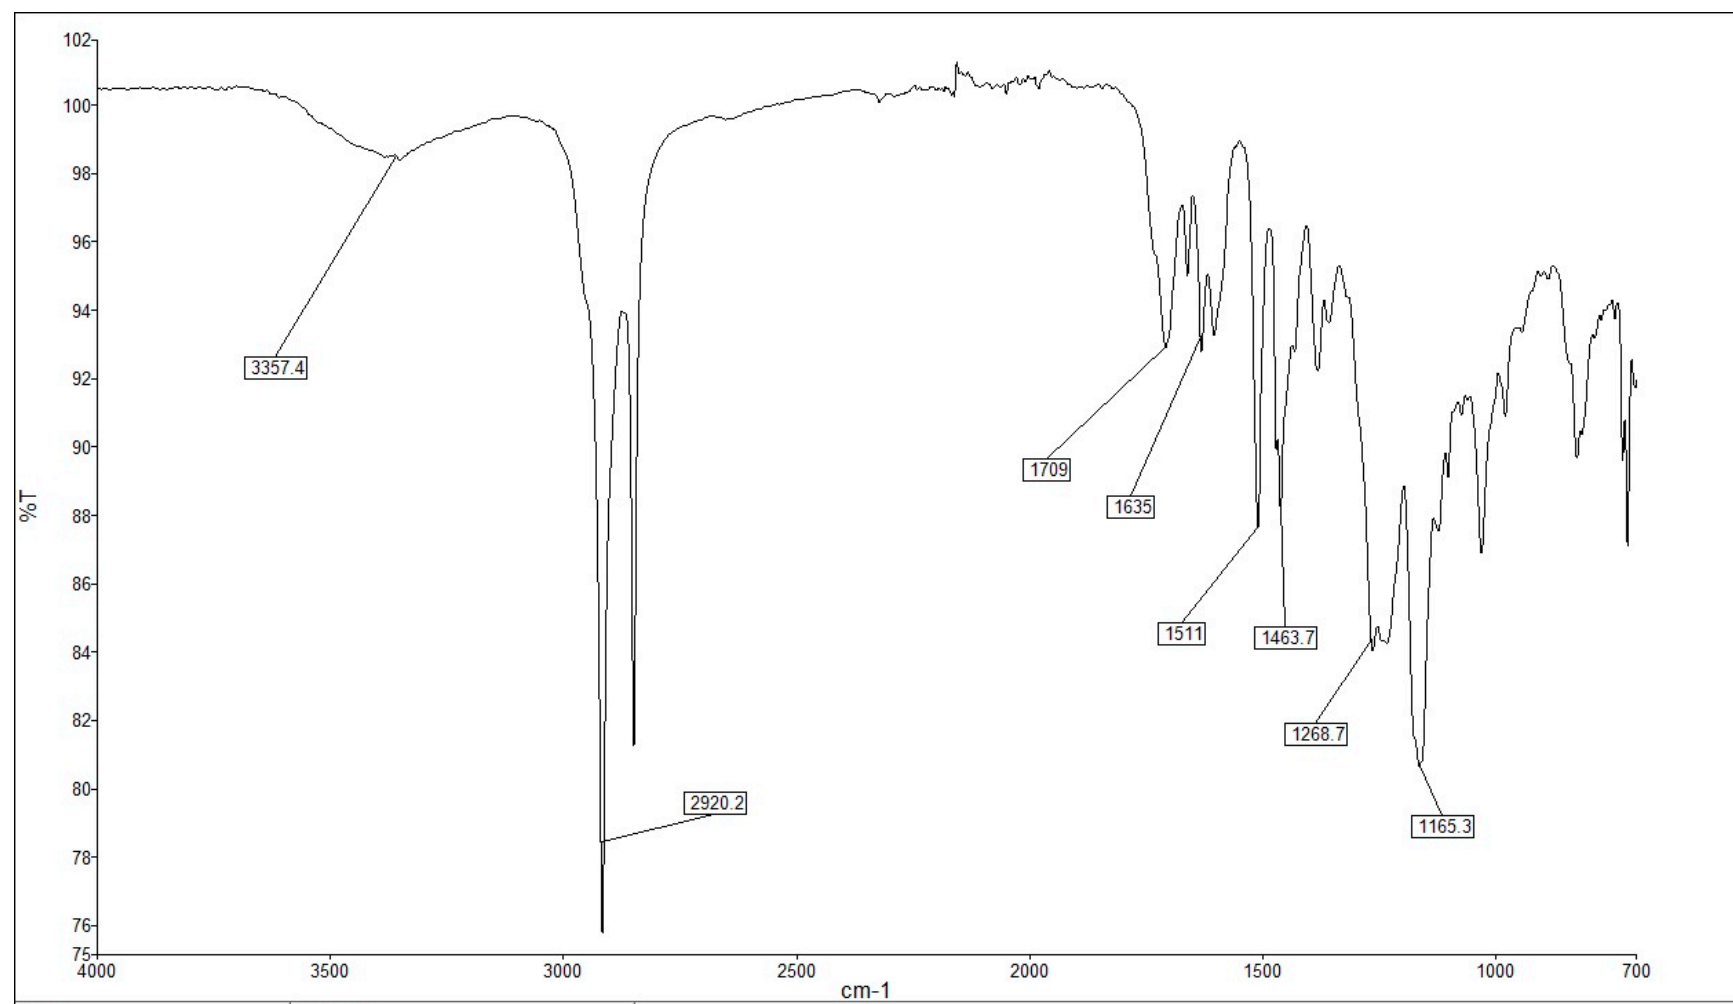

**Figure S32:** FT-IR spectrum of Tetradecyl (E)-ferulate (**8**).

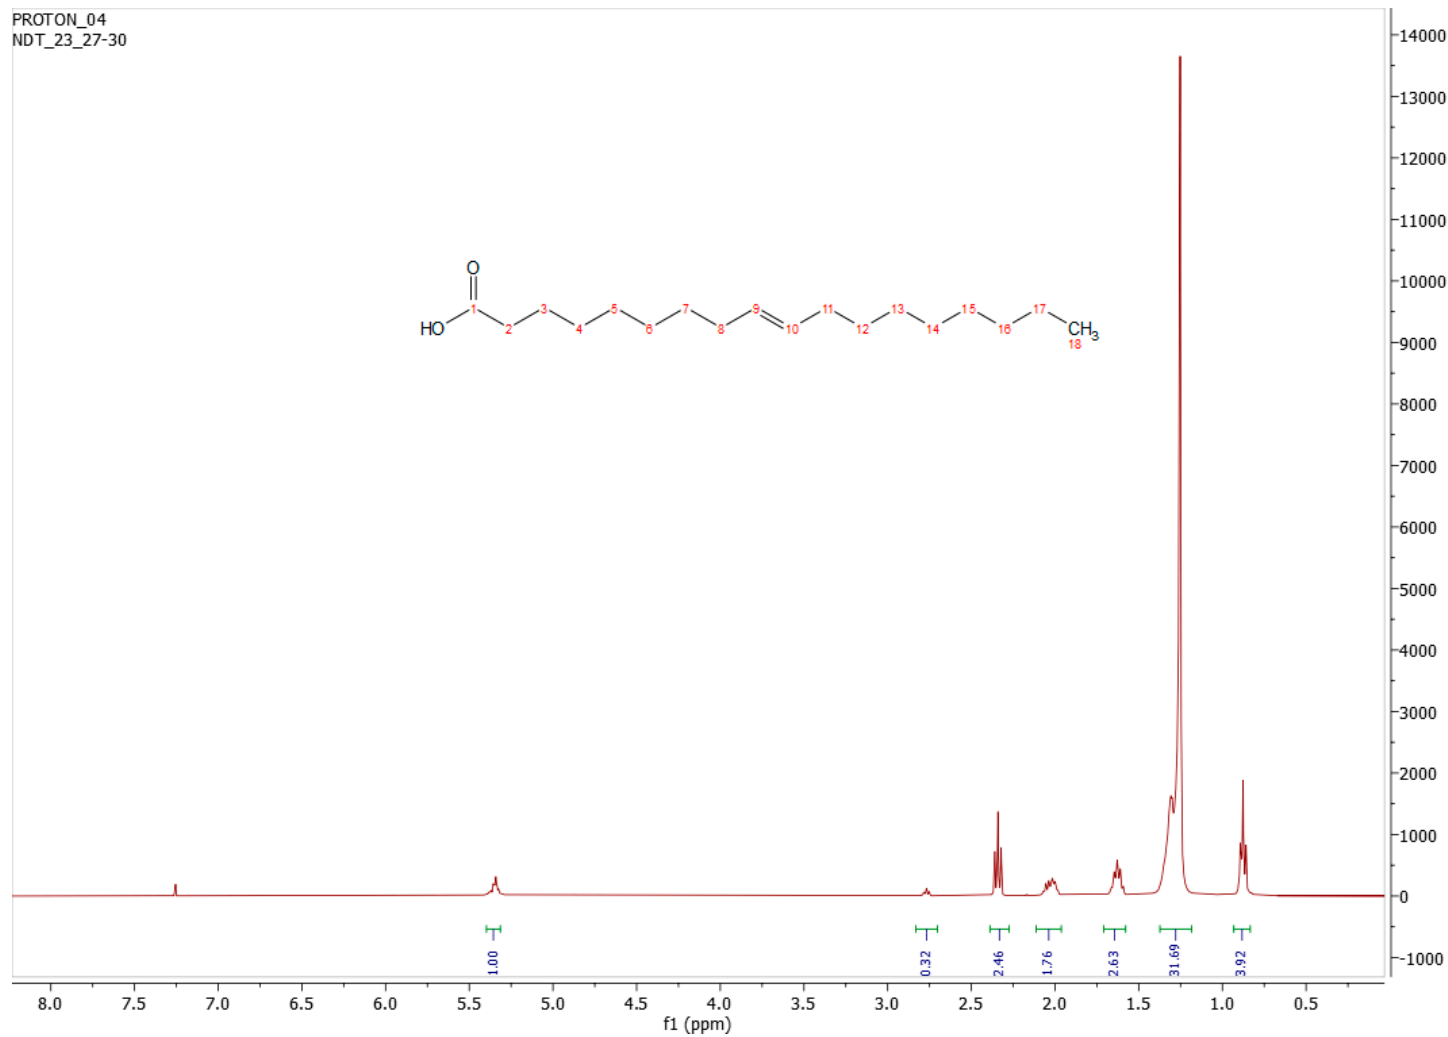

**Figure S33:**  $^1\text{H}$  NMR spectrum of 9-Octadecenoic acid (**9**) recorded in  $\text{CDCl}_3$ .

CARBON\_03

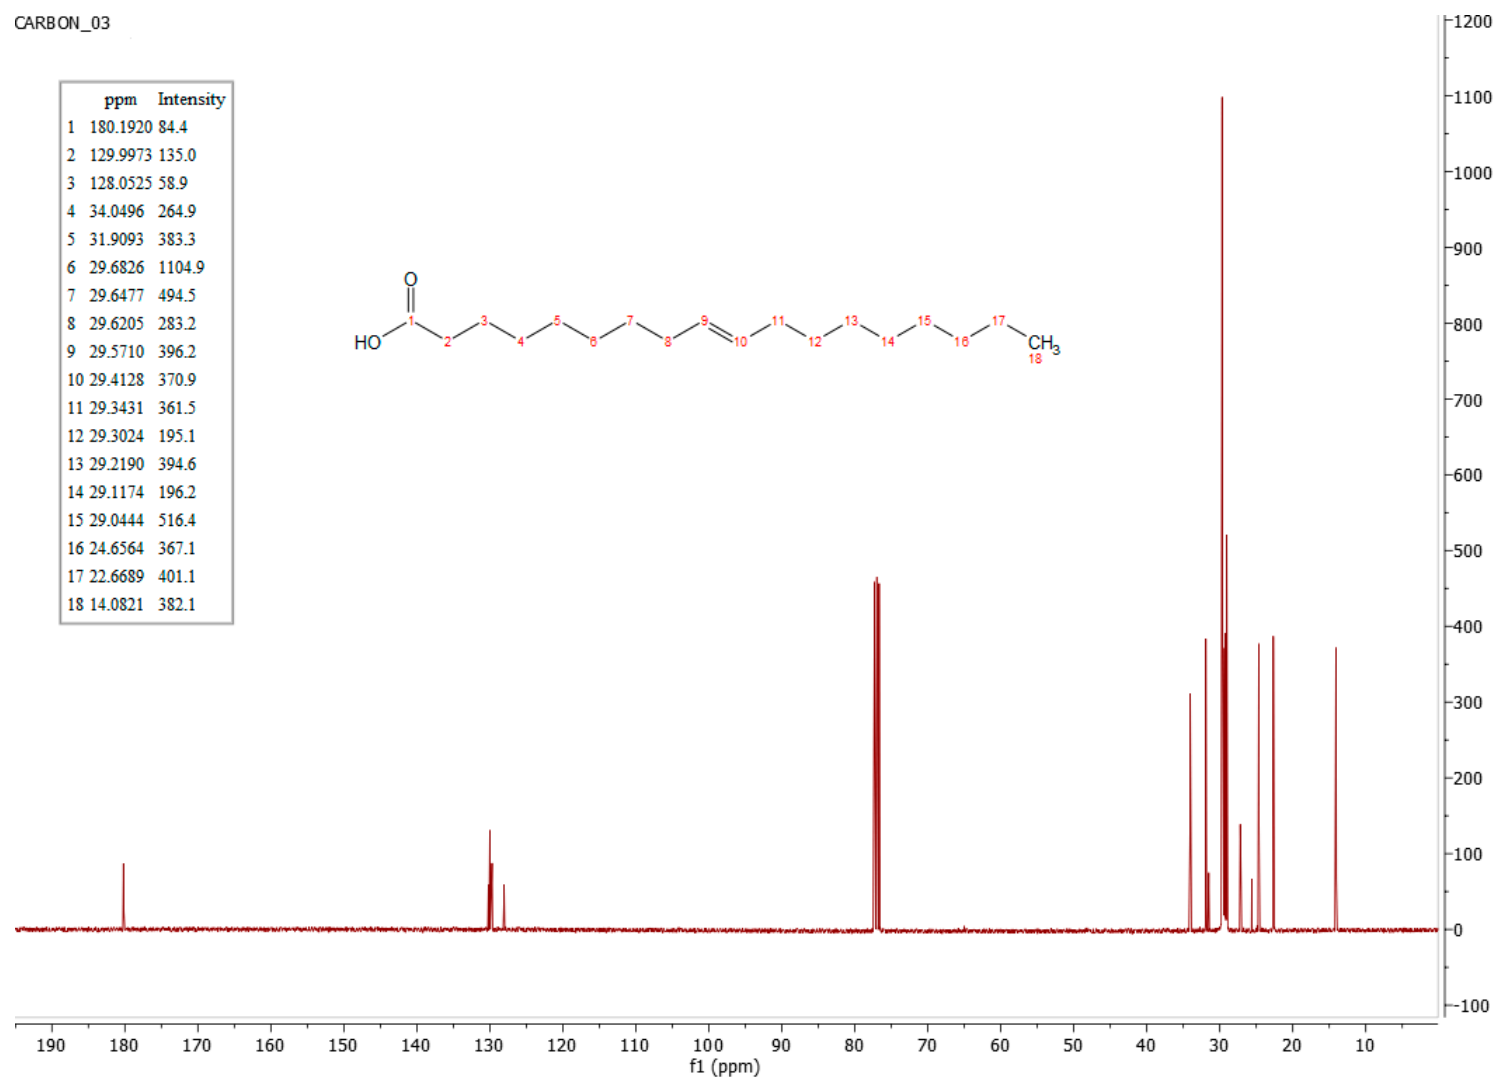

**Figure S34:**  $^{13}\text{C}$  NMR spectrum of 9-Octadecenoic acid (**9**) recorded in  $\text{CDCl}_3$

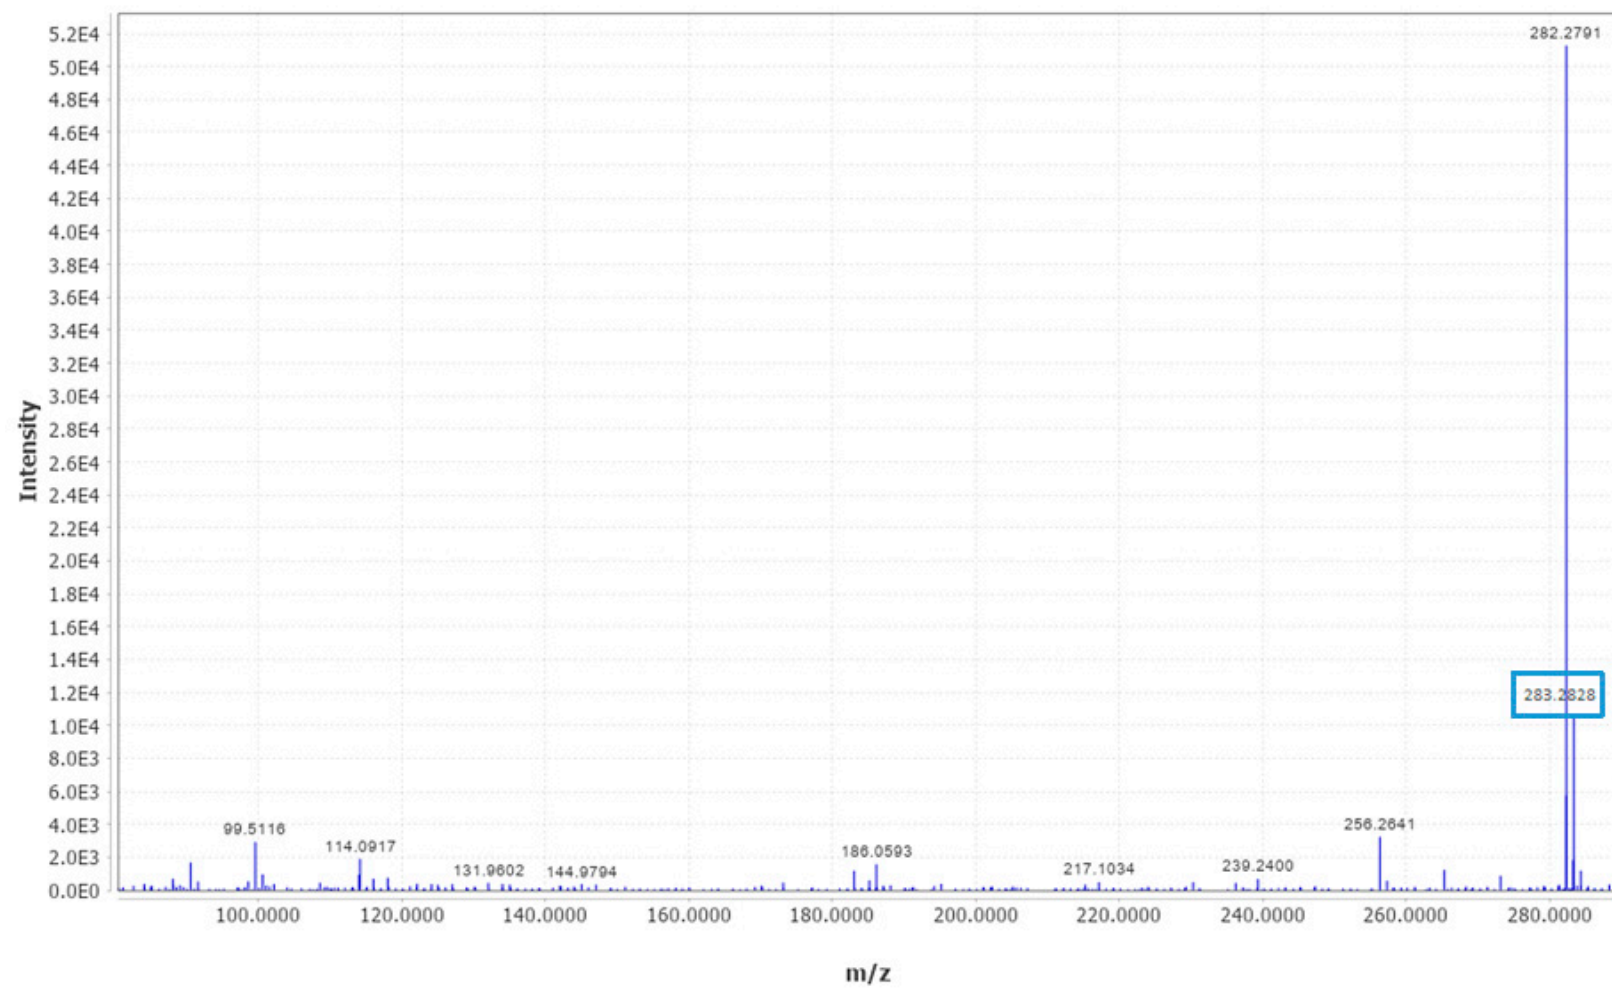

**Figure S35:** MS spectrum of 9-Octadecenoic acid (**9**).

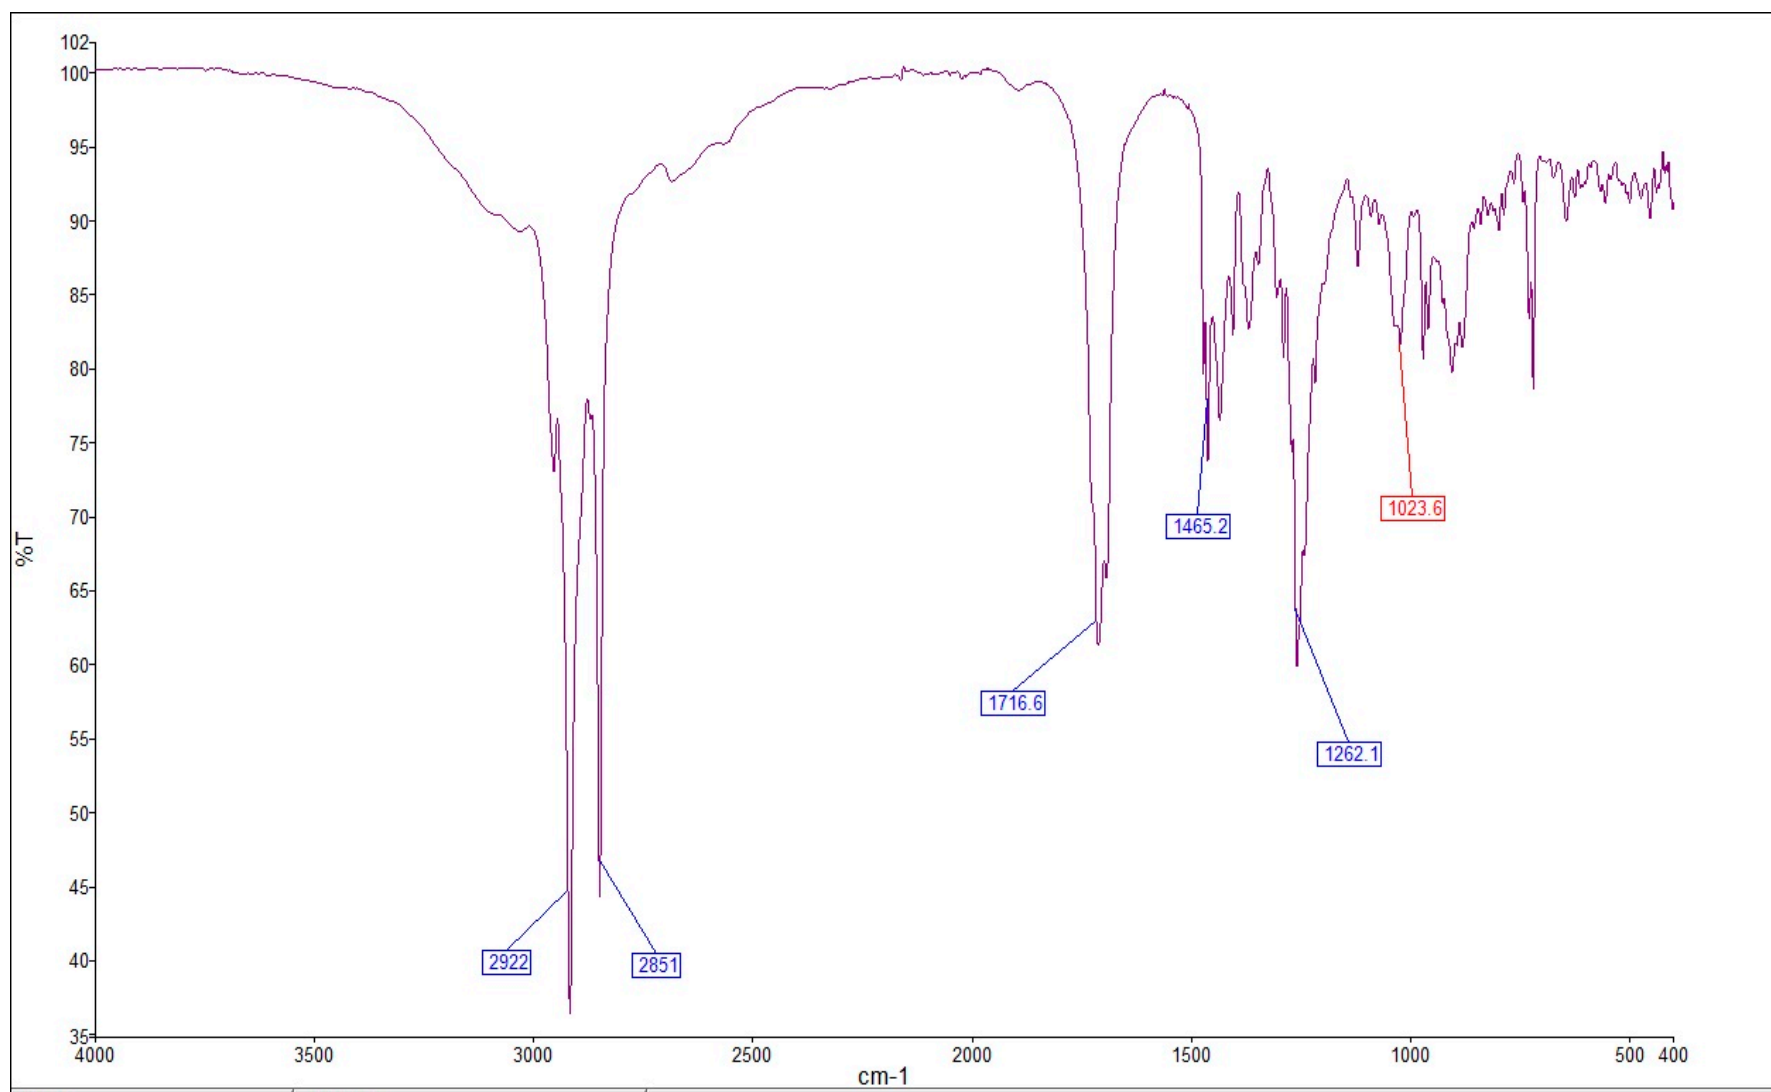

**Figure S36:** FT-IR spectrum of 9-Octadecenoic acid (**9**).

Table S1. <sup>13</sup>C NMR (100 MHz) data (δ value) of isolated compounds (1-9) in CHCl<sub>3</sub>

| C.<br>No | 13C NMR (100 MHz) δ value |                         |                         |                         |                         |                             |                         |                         |                         |
|----------|---------------------------|-------------------------|-------------------------|-------------------------|-------------------------|-----------------------------|-------------------------|-------------------------|-------------------------|
|          | Compound<br>1             | Compound<br>2           | Compound<br>3           | Compound<br>4           | Compound<br>5           | Compound<br>6               | Compound<br>7           | Compound<br>8           | Compound<br>9           |
| 1.       | 22.3 (CH <sub>2</sub> )   | 36.1 (CH <sub>2</sub> ) | 32.1 (CH <sub>2</sub> ) | 38.7 (CH <sub>2</sub> ) | 37.2 (CH <sub>2</sub> ) | 113.0 (C)                   | 38.1 (CH <sub>2</sub> ) | 127.0 (C)               | 180.1 (C)               |
| 2.       | 41.6 (CH <sub>2</sub> )   | 211.9 (C)               | 195.0 (C)               | 27.4 (CH <sub>2</sub> ) | 31.7 (CH <sub>2</sub> ) | 165.9 (CH)                  | 27.7 (CH <sub>2</sub> ) | 123.1 (CH)              | 34.2 (CH <sub>2</sub> ) |
| 3.       | 213.1 (C)                 | 76.9 (CH <sub>2</sub> ) | 142.6 (CH)              | 79.0 (CH)               | 71.8 (CH)               | 103.6 (CH)                  | 80.9 (CH)               | 114.7 (CH)              | 24.7 (CH <sub>2</sub> ) |
| 4.       | 58.2 (CH)                 | 54.6 (CH)               | 140.8 (C)               | 38.9 (C)                | 42.3 (CH <sub>2</sub> ) | 55.2<br>(OCH <sub>3</sub> ) | 37.7 (C)                | 147.9(C)                | 28.9 (CH <sub>2</sub> ) |
| 5.       | 42.1 (C)                  | 38.1 (C)                | 39.7 (C)                | 55.3 (CH)               | 140.8 (C)               | 162.4 (C)                   | 55.3 (CH)               | 146.7 (C)               | 29.3 (CH <sub>2</sub> ) |
| 6.       | 41.6 (CH <sub>2</sub> )   | 40.6 (CH <sub>2</sub> ) | 38.4 (CH <sub>2</sub> ) | 18.3 (CH <sub>2</sub> ) | 121.7 (CH)              | 107.7 (CH)                  | 18.2 (CH <sub>2</sub> ) | 109.3 (CH)              | 29.7 (CH <sub>2</sub> ) |
| 7.       | 18.3 (CH <sub>2</sub> )   | 17.6 (CH <sub>2</sub> ) | 18.0 (CH <sub>2</sub> ) | 34.3 (CH <sub>2</sub> ) | 31.9 (CH <sub>2</sub> ) | 132.7 (CH)                  | 32.5 (CH <sub>2</sub> ) | 144.8 (CH)              | 29.4 (CH <sub>2</sub> ) |
| 8.       | 53.1 (CH)                 | 53.9 (CH)               | 52.6 (CH)               | 40.8 (C)                | 31.9 (CH)               | 205.0 (C)                   | 39.3 (C)                | 115.7 (CH)              | 27.2 (CH <sub>2</sub> ) |
| 9.       | 37.4 (C)                  | 37.6 (C)                | 36.7 (C)                | 50.4 (CH)               | 50.1 (CH)               | 46.0 (CH)                   | 47.5 (CH)               | 167.4 (C)               | 130.0 (C)               |
| 10.      | 59.5 (CH)                 | 60.4 (CH)               | 55.7 (CH)               | 37.1 (C)                | 36.5 (C)                | 19.2 (CH <sub>3</sub> )     | 37.0 (C)                | 64 (CH <sub>2</sub> )   | 128.1 (C)               |
| 11.      | 35.6 (CH <sub>2</sub> )   | 35.0 (CH <sub>2</sub> ) | 34.7 (CH <sub>2</sub> ) | 20.9 (CH <sub>2</sub> ) | 21.1 (CH)               | 133.5 (C)                   | 23.4 (CH <sub>2</sub> ) | 28.9 (CH <sub>2</sub> ) | 25.7 (CH <sub>2</sub> ) |
| 12.      | 30.5 (CH <sub>2</sub> )   | 30.1 (CH)               | 30.2 (CH <sub>2</sub> ) | 25.1 (CH <sub>2</sub> ) | 39.7 (CH <sub>2</sub> ) | 128.6 (CH)                  | 122.6 (CH)              | 26.1 (CH <sub>2</sub> ) | 29.2 (CH <sub>2</sub> ) |
| 13.      | 39.7 (C)                  | 39.6 (C)                | 39.5 (C)                | 38.0 (CH)               | 42.2                    | 114.4 (CH)                  | 143.6 (C)               | 29.3 (CH <sub>2</sub> ) | 29.3 (CH <sub>2</sub> ) |
| 14.      | 38.3 (C)                  | 38.3 (C)                | 38.2 (C)                | 42.8 (C)                | 56.8 (CH)               | 55.2(OCH <sub>3</sub> )     | 41.6 (C)                | 29.4 (CH <sub>2</sub> ) | 29.6 (CH <sub>2</sub> ) |
| 15.      | 32.4 (CH <sub>2</sub> )   | 32.2 (CH <sub>2</sub> ) | 32.2 (CH <sub>2</sub> ) | 27.4 (CH <sub>2</sub> ) | 24.4 (CH <sub>2</sub> ) | 158.7 (C)                   | 27.7 (CH <sub>2</sub> ) | 29.5 (CH <sub>2</sub> ) | 29.7 (CH <sub>2</sub> ) |
| 16.      | 36.0 (CH <sub>2</sub> )   | 35.8 (CH <sub>2</sub> ) | 35.9 (CH <sub>2</sub> ) | 35.6 (CH <sub>2</sub> ) | 29.7 (CH <sub>2</sub> ) | 114.4 (CH)                  | 22.9 (CH <sub>2</sub> ) | 29.5 (CH <sub>2</sub> ) | 31.9 (CH <sub>2</sub> ) |
| 17.      | 30.0 (C)                  | 30.0 (C)                | 30.0 (C)                | 43.0 (C)                | 56.8 (CH)               | 128.6 (CH)                  | 46.5 (C)                | 29.6 (CH <sub>2</sub> ) | 22.7 (CH <sub>2</sub> ) |
| 18.      | 42.8 (CH)                 | 42.7 (CH)               | 42.6 (CH)               | 48.3 (CH)               | 12.0 (CH <sub>3</sub> ) | -                           | 41.0 (CH <sub>2</sub> ) | 29.6 (CH <sub>2</sub> ) | 14.1 (CH <sub>3</sub> ) |
| 19.      | 35.3 (CH)                 | 35.3 (CH <sub>2</sub> ) | 35.3 (CH <sub>2</sub> ) | 48.0 (CH)               | 19.4 (CH <sub>3</sub> ) | -                           | 45.8 (CH <sub>2</sub> ) | 29.7 (CH <sub>2</sub> ) | -                       |
| 20.      | 28.1 (C)                  | 28.1 (CH <sub>2</sub> ) | 28.1 (C)                | 151.0 (C)               | 40.5 (CH)               | -                           | 30.7 (C)                | 29.7 (CH <sub>2</sub> ) | -                       |
| 21.      | 32.8 (CH <sub>2</sub> )   | 32.8 (CH <sub>2</sub> ) | 32.7 (CH <sub>2</sub> ) | 29.8 (CH <sub>2</sub> ) | 21.2 (CH <sub>3</sub> ) | -                           | 33.8 (CH <sub>2</sub> ) | 29.8 (CH <sub>2</sub> ) | -                       |
| 22.      | 39.2 (CH <sub>2</sub> )   | 39.2 (CH <sub>2</sub> ) | 39.3 (CH <sub>2</sub> ) | 40.0 (CH <sub>2</sub> ) | 138.3 (CH)              | -                           | 32.4 (CH <sub>2</sub> ) | 22.7 (CH <sub>2</sub> ) | -                       |
| 23.      | 6.8 (CH <sub>3</sub> )    | 10.8 (CH <sub>3</sub> ) | 10.4 (CH <sub>3</sub> ) | 28.0 (CH <sub>3</sub> ) | 129.3 (CH)              | -                           | 16.6 (CH <sub>3</sub> ) | 14.2 (CH <sub>3</sub> ) | -                       |

|     |                         |                         |                         |                          |                         |   |                         |                          |   |
|-----|-------------------------|-------------------------|-------------------------|--------------------------|-------------------------|---|-------------------------|--------------------------|---|
| 24. | 14.6 (CH <sub>3</sub> ) | 14.2 (CH <sub>3</sub> ) | 17.7 (CH <sub>3</sub> ) | 15.3 (CH <sub>3</sub> )  | 51.2 (CH)               | - | 28.0 (CH <sub>3</sub> ) | 55.9 (OCH <sub>3</sub> ) | - |
| 25. | 17.9 (CH <sub>3</sub> ) | 17.6 (CH <sub>3</sub> ) | 18.6 (CH <sub>3</sub> ) | 16.1 (CH <sub>3</sub> )  | 31.9 (CH)               | - | 15.4 (CH <sub>3</sub> ) | -                        | - |
| 26. | 20.2 (CH <sub>3</sub> ) | 19.9 (CH <sub>3</sub> ) | 18.9 (CH <sub>3</sub> ) | 16.0 (CH <sub>3</sub> )  | 21.1 (CH <sub>3</sub> ) | - | 17.1 (CH <sub>3</sub> ) | -                        | - |
| 27. | 18.6 (CH <sub>3</sub> ) | 18.6 (CH <sub>3</sub> ) | 20.1 (CH <sub>3</sub> ) | 14.5 (CH <sub>3</sub> )  | 19.0 (CH <sub>3</sub> ) | - | 25.9 (CH <sub>3</sub> ) | -                        | - |
| 28. | 32.1 (CH <sub>3</sub> ) | 32.2 (CH <sub>3</sub> ) | 32.1 (CH <sub>3</sub> ) | 18.0 (CH <sub>3</sub> )  | 25.4 (CH <sub>2</sub> ) | - | 183.4 (C)               | -                        | - |
| 29. | 35.0 (CH <sub>3</sub> ) | 31.9 (CH <sub>3</sub> ) | 31.8 (CH <sub>3</sub> ) | 109.3 (CH <sub>2</sub> ) | 12.2 (CH <sub>3</sub> ) | - | 23.6 (CH <sub>3</sub> ) | -                        | - |
| 30. | 31.8 (CH <sub>3</sub> ) | 35.3 (CH <sub>3</sub> ) | 35.0 (CH <sub>3</sub> ) | 19.3 (CH <sub>3</sub> )  | -                       | - | 33.0 (CH <sub>3</sub> ) | -                        | - |
| 31. | -                       | -                       | -                       | -                        | -                       | - | 21.3 (CH <sub>3</sub> ) | -                        | - |
| 32. | -                       | -                       | -                       | -                        | -                       | - | 171.0 (C)               | -                        | - |



Table S2. <sup>1</sup>H NMR (400 MHz) data (δ value) of isolated compounds (1-5 and 7) in CHCl<sub>3</sub>

| C.<br>No | <sup>1</sup> H NMR (400MHz, δ, ppm) |                                                                                      |                                                                                         |                                         |                                            |                                                |
|----------|-------------------------------------|--------------------------------------------------------------------------------------|-----------------------------------------------------------------------------------------|-----------------------------------------|--------------------------------------------|------------------------------------------------|
|          | Compound 1                          | Compound 2                                                                           | Compound 3                                                                              | Compound 4                              | Compound 5                                 | Compound 7                                     |
| 1.       | 1.91 (1H, m)<br>1.65 (1H, m)        | 2.39 (1H, t, <i>J</i> =13.8 Hz)<br>2.52 (1H, dd <i>J</i> = 10.8, 2.9 Hz)             | 2.42 (1H, dd <i>J</i> =<br>17.8.0, 15.7 Hz)<br>2.53 (1H, dd <i>J</i> = 17.8,<br>3.64 Hz | 0.91 (1H, m)                            | 1.85 (1H, m),<br>1.08 (1H, m)              | 1.60, 1.05 (2H, m)                             |
| 2.       | 2.36 (1H, m)<br>2.27 (1H, m)        | -                                                                                    | -                                                                                       | 1.67 (1H, m)                            | 1.84 (1H, m), 1.50<br>(1H, m)              | 162, 188 (2H, m)                               |
| 3.       | -                                   | 3.81 (1H, dd <i>J</i> =11.8, 2.96<br>Hz)<br>3.51 (1H, d, <i>J</i> = 3.48 Hz OH-<br>3 | 5.98 (1H, s, OH-3)                                                                      | 1.60 (1H, d, <i>J</i> =<br>10.0 Hz)     | 3.51 (tdd, <i>J</i> = 6.1,<br>4.4, 5.1 Hz) | 4.51 (1H, t, <i>J</i> = 7.6<br>Hz)             |
| 4.       | 2.21 (1H, q,<br><i>J</i> =6.7 Hz)   | 1.29 (m)                                                                             | -                                                                                       | 1.52 (1H, m)                            | 2.30 (1H, m)<br>2.23 (1H, m)               | -                                              |
| 5.       | -                                   | -                                                                                    | -                                                                                       | 3.19 (1H, dd, <i>J</i><br>=4.4, 6.4 Hz) | -                                          | 0.85 (1H, m)                                   |
| 6.       | 1.73 (1H, m)<br>1.23 (1H, m)        | 1.06 (1H, m)<br>1.85 (1H, br d <i>J</i> =12.8 Hz)                                    | 1.93 (1H, dd <i>J</i> = 12.0,<br>2.52 Hz)<br>181 (1H, m)                                | -                                       | 5.34 (d, <i>J</i> = 5.2<br>Hz)             | 1.52, 1.40 (2H, m)                             |
| 7.       | 1.47 (1H, m)<br>1.38 (1H, m)        | 1.43 (1H, m)<br>1.48 (1H, m)                                                         | 1.50 (1H, m)<br>1.44 (1H, m)                                                            | 0.70 (1H, d, <i>J</i> =<br>5.2 Hz)      | 1.99(1H, m)<br>1.53 (1H, m)                | 1.40, 1.28 (2H, m)                             |
| 8.       | 1.38 (1H, m)                        | 1.29 (1H, m)                                                                         | 1.37 (1H, m)                                                                            | 1.52 (1H, m)                            | 1.49 (1H, m)                               | -                                              |
| 9.       | -                                   | -                                                                                    | -                                                                                       | 1.39 (1H, m)                            | 0.93 (1H, m)                               | 1.55 (1H, t)                                   |
| 10.      | 1.53 (1H, m)                        | 1.30 (1H, m)                                                                         | 1.80 (1H, m)                                                                            | <1.38> (2H, m)                          | -                                          | -                                              |
| 11.      | 1.45 (1H, m)<br>1.27 (1H, m)        | 1.20 (1H, m)<br>1.30 (1H, m)                                                         | 1.32 (1H, m)<br>1.26 (1H, m)                                                            | -                                       | <1.50> (1H, m)                             | 1.88, 1.62 (2H,<br>dd, <i>J</i> = 6.0, 3.7 Hz) |
| 12.      | 1.32 <1H, m>                        | 1.33 (2H, m)                                                                         | 1.33 (2H, m)                                                                            | 1.26 (1H, m)                            | 2.04 (1H, m)<br>1.17 (H, m)                | 5.28 (1H, t, <i>J</i> = 3.7<br>Hz)             |
| 13.      | -                                   | -                                                                                    | -                                                                                       | -                                       | -                                          | -                                              |

|     |                                     |                                  |                              |                                     |                                     |                                              |
|-----|-------------------------------------|----------------------------------|------------------------------|-------------------------------------|-------------------------------------|----------------------------------------------|
| 14. | -                                   | -                                | -                            | 1.40 (1H, m)                        | 1.02 (1H, m)                        | -                                            |
| 15. | 1.46 (1H, m)<br>1.25 (1H, m)        | 1.27 (1H, m)<br>1.51 (1H, m)     | 1.50 (1H, m)<br>1.30 (1H, m) | 1.25 (1H, m)                        | 1.56 (1H, m)<br>1.03 (1H, m)        | 1.05, 1.72 (2H, m)                           |
| 16. | 1.55 (1H, m)                        | 1.33 (1H, m)<br>1.51 (1H, m)     | 1.54 (1H, m)<br>1.38 (1H, m) | 1.67 (1H, d,<br>$J=9.6\text{Hz}$ ), | 1.26 (1H, m)<br>1.05 (1H, m)        | 1.98, 1.94 (2H,<br>dd, $J = 9.4, 4.0$<br>Hz) |
| 17. | -                                   | -                                | -                            | 1.02 (1H, m)                        | 1.16 (1H, m)                        | -                                            |
| 18. | 1.53 (1H, m)                        | 1.52 (1H, m)                     | 1.55 (1H, m)                 | 1.67 (1H, t)                        | 0.69 (3H, s)                        | 2.84 (2H, dd, $J=$<br>9.4, 4.6 Hz)           |
| 19. | 1.44 (1H, m)                        | 1.16 (1H, m)<br>1.32 (1H, m)     | 1.20 (1H, m)                 | -                                   | 1.02 (3H, s)                        | 1.62, 1.18 (2H, m)                           |
| 20. | -                                   | -                                | -                            | 1.71 (1H, m)                        | 2.04 (1H, m)                        | -                                            |
| 21. | 1.46 (1H, m)<br>1.26 (1H, m)        | 1.47 (2H, m)                     | 1.46 (1H, m)<br>1.28 (1H, m) | 1.02 (1H, m)                        | 1.02 (3H, s)                        | 1.22, 1.19 (2H, m)                           |
| 22. | 1.45 (1H, m)<br>0.93 (1H, m)        | 1.46 (2H, m)                     | 1.51 (1H, m)                 | 1.46 (1H, m)                        | 5.14 (1H, dd, $J =$<br>8.5, 6.6 Hz) | 1.76, 1.57 (2H, m)                           |
| 23. | 0.86 (3H, d,<br>$J=6.3\text{ Hz}$ ) | 1.05 (3H, d, $J=6.6\text{ Hz}$ ) | 1.80 (3H, s)                 | 1.36 (1H, m)                        | 5.05 (1H, dd, $J =$<br>8.5, 6.4 Hz) | 0.85 (3H, s)                                 |
| 24. | 0.71 (3H, s)                        | 1.03 (3H, s)                     | 0.93 (3H, s)                 | -                                   | 1.52 (1H, m)                        | 0.86 (3H, s)                                 |
| 25. | 0.86 (3H, s)                        | 0.87 (3H, s)                     | 0.98 (3H, s)                 | 1.36 (1H, t)                        | 1.52 (1H, m)                        | 0.94 (3H, s)                                 |
| 26. | 0.98 (3H, s)                        | 1.00 (3H, s)                     | 1.09 (3H, s)                 | 2.38 (1H, td, $J=$<br>5.2, 5.6 Hz)  | 0.83 (3H, d, $J =$<br>5.8 Hz)       | 0.75 (3H, s)                                 |
| 27. | 1.04 (3H, s)                        | 0.97 (3H, s)                     | 1.00 (3H, s)                 | -                                   | 0.80 (3H, d, $J =$<br>5.8 Hz)       | 1.13 (3H, s)                                 |
| 28. | 1.16 (3H, s)                        | 1.17 (3H, s)                     | 1.17 (3H, s)                 | 1.91 (1H, m)                        | 1.42 (1H, m)<br>1.16 (1H, m)        | -                                            |
| 29. | 0.99 (3H, s)                        | 0.98 (3H, s)                     | 0.99 (3H, s)                 | 1.33 (1H, m)                        | 0.80 (3H, t, $J =$<br>6.4 Hz)       | 0.93 (3H, s)                                 |
| 30. | 0.94 (3H, s)                        | 0.94 (3H, s)                     | 0.93 (3H, s)                 | 1.38 (1H, m)                        | -                                   | 0.90 (3H, s)                                 |
| 31. | -                                   | -                                | -                            | -                                   | -                                   | 2.04 (3H, s)                                 |

Table S3. <sup>1</sup>H NMR (400 MHz) data (δ value) of isolated compounds (6, 8 and 9) in CHCl<sub>3</sub>

| Carbon No | <sup>1</sup> H NMR (400MHz, δ, ppm)   |                                       |                                 |
|-----------|---------------------------------------|---------------------------------------|---------------------------------|
|           | Compound 6                            | Compound 8                            | Compound 9                      |
| 1.        | -                                     | -                                     | -                               |
| 2.        | 13.05 (1H, s, -OH)                    | 7.07 (1H, dd, <i>J</i> = 8.2, 1.6 Hz) | 2.34 (2H, t, <i>J</i> = 7.5 Hz) |
| 3.        | 6.36 (1H, d, <i>J</i> = 2.6 Hz)       | 6.92 (1H, d, <i>J</i> = 8.1 Hz)       | 1.63 (2H, m)                    |
| 4.        | 3.76 (3H, s, OCH <sub>3</sub> )       | -                                     | 1.31 (2H, m)                    |
| 5.        |                                       | -                                     | 1.26 (2H, m)                    |
| 6.        | 6.33 (1H, dd, <i>J</i> = 8.0, 2.6 Hz) | 7.03 (1H, d, <i>J</i> = 2.0 Hz)       | 1.26 (2H, m)                    |
| 7.        | 7.70 (1H, d, <i>J</i> = 8.0 Hz)       | 7.36 (1H, d, <i>J</i> = 15.9 Hz)      | 1.30 (2H, m)                    |
| 8.        | -                                     | 6.31(1H, d, <i>J</i> = 15.9 Hz)       | 2.02 (2H, m)                    |
| 9.        | 4.60 (1H, q, <i>J</i> = 8.0 Hz)       | -                                     | 5.35 (1H, m)                    |
| 10.       | 1.50 (3H, s)                          | 4.19 (2H, t, <i>J</i> = 6.7 Hz)       | 5.35 (1H, m)                    |
| 11.       | -                                     | 1.69 (2H, m)                          | 2.78 (2H, m)                    |
| 12.       | 7.21 (1H, d, <i>J</i> = 7.0 Hz)       | 1.38 (2H, m)                          | 1.25 (2H, m)                    |
| 13.       | 6.85 (1H, d, <i>J</i> = 7.0Hz)        | 1.34 (2H, m)                          | 1.26 (2H, m)                    |
| 14.       | 3.76 (3H, s, OCH <sub>3</sub> )       | 1.33 (2H, m)                          | 1.26 (2H, m)                    |
| 15.       | -                                     | 1.32 (2H, m)                          | 1.26 (2H, m)                    |
| 16.       | 6.83 (2H, d, <i>J</i> = 7.0 Hz)       | 1.31 (2H, m)                          | 1.27 (2H, m)                    |
| 17.       | 7.21 (2H, d, <i>J</i> = 7.0 Hz)       | 1.32 (2H, m)                          | 1.30 (2H, m)                    |
| 18.       | -                                     | 1.30 (2H, m)                          | 0.88 (3H, t, <i>J</i> = 7.0 Hz) |
| 19.       | -                                     | 1.26 (2H, m)                          | -                               |
| 20.       | -                                     | 1.26 (2H, m)                          | -                               |
| 21.       | -                                     | 1.25 (2H, m)                          | -                               |
| 22.       | -                                     | 1.25 (2H, m)                          | -                               |
| 23.       | -                                     | 3.91 O-CH <sub>3</sub> (3H, s)        | -                               |

|     |   |                           |   |
|-----|---|---------------------------|---|
| 24. | - | 0.88 (3H, t, $J= 6.6$ Hz) | - |
|-----|---|---------------------------|---|
